# Supplementary material
Source: PubMed Central journal article supplement (PMC2638762)
Supplement: NIHMS62971-supplement-1si20070924_12.pdf [file NIHMS62971-supplement-1si20070924_12.pdf]

## Asymmetric Allylboration of Acyl Imines Catalyzed by Chiral Diols

Sha Lou, Philip N. Moquist, Scott E. Schaus\*

*Department of Chemistry, Center for Chemical Methodology and Library Development at Boston University (CMLD-BU), Life Science and Engineering Building, Boston University  
24 Cummington Street, Boston, Massachusetts, 02215*

### Supporting Information

#### Table of Contents

|                                                                                  |     |
|----------------------------------------------------------------------------------|-----|
| General information.....                                                         | S2  |
| Preparation of acyl imines.....                                                  | S2  |
| Preparation of crotyldiisopropoxyborane.....                                     | S7  |
| General procedure for asymmetric allylboration of acyl imines. ....              | S8  |
| Absolute stereochemistry determination of allylboration products .....           | S9  |
| Analytical data for allylboration products <b>9a-9p, 11e-11l</b> .....           | S10 |
| Procedures for the synthesis of Maraviroc <b>17</b> .....                        | S18 |
| General procedure for asymmetric crotylboration of acyl imines.....              | S21 |
| Crotylation diastereoselectivity and absolute stereochemistry determination..... | S22 |
| Kinetic study.....                                                               | S24 |
| <sup>1</sup> H-NMR and <sup>11</sup> B-NMR study ... ..                          | S25 |
| ESI-MS study.....                                                                | S33 |
| NMR spectra for aliphatic imines and Maraviroc.....                              | S36 |
| HPLC traces for <b>9a-9p, 11e-11l</b> .....                                      | S40 |

**General Information.** All  $^1\text{H}$  NMR, and  $^{13}\text{C}$  NMR spectra were recorded using Varian Unity Plus 400 (93.94 kG,  $^1\text{H}$  400 MHz) or Varian Gemini 300 (70.5 kG,  $^{13}\text{C}$  75 MHz) spectrometers at ambient temperature in  $\text{CDCl}_3$ . Chemical shifts are reported in parts per million as follows: chemical shift, multiplicity (s = singlet, d = doublet, t = triplet, q = quartet, m = multiplet, br = broad), coupling constant, and integration. Infrared spectra were recorded on a Nicolet Nexus 670 FT-IR ESP spectrophotometer. Optical rotations were recorded on an AUTOPOL III digital polarimeter at 589 nm, and were reported as  $[\alpha]_D$  (concentration in grams/100 mL solvent). Analytical thin layer chromatography was performed using EMD 0.25 mm silica gel 60-F plates. Flash column chromatography was performed on Sorbent Technologies 60 Å silica gel. Chiral HPLC analysis was performed using an Agilent 1100 series HPLC with a diode array detector. Chiral columns include Chiralcel<sup>®</sup>OD (Chiral Technologies Inc., 24cm×4.6mm I.D.), Chiralpak<sup>®</sup>AD-H (Chiral Technologies Inc., 25cm × 4.6 mm I.D.) and (*R,R*)-Whelk-O 1 (Regis<sup>®</sup> Technologies Inc., 25cm× 4.6mm I.D.) columns. High-resolution mass spectra were obtained in the Boston University Chemical Instrumentation Center using a Waters Q-TOF mass spectrometer. Low-resolution mass were performed on a MicroMass ZQ 2000 mass spectrometer. Melting points were recorded using a Thomas Hoover capillary melting point apparatus. All reactions were performed under argon, in oven dried glassware with magnetic stirring. (*S*)-BINOL **7e** and (*S*)-3,3'-Br<sub>2</sub>-BINOL **7f**, and (*S*)-3,3'-Br<sub>2</sub>-H<sub>8</sub>-BINOL **7g** were purchased from STREM and used without further purification. (*S*)-3,3'-Ph<sub>2</sub>-BINOL **7h** was prepared according to literature procedure.<sup>1</sup> Monomethyl ether **7i** was prepared via reaction of **7h** with  $\text{CH}_3\text{I}$  in the presence of NaH in DMF at room temperature. Kinetic parameters for the asymmetric allylboration reaction were determined by *in situ* monitoring of the formation of homoallylic amide **6a** at  $1428.23\text{ cm}^{-1}$  using a ReactIR 4000 system (Mettler Toledo-AutoChem). The ReactIR 4000 system, running software version 3.1, was fitted with a FiberConduit and a 6 mm DiComp Probe. IR spectra, comprised of 64 scans per spectrum, were collected every one minute at a resolution of  $8\text{ cm}^{-1}$ . Allyldiisopropoxyborane was prepared according our previous reported procedure.<sup>2</sup>

### General procedure for preparation of acyl imines.<sup>3</sup>

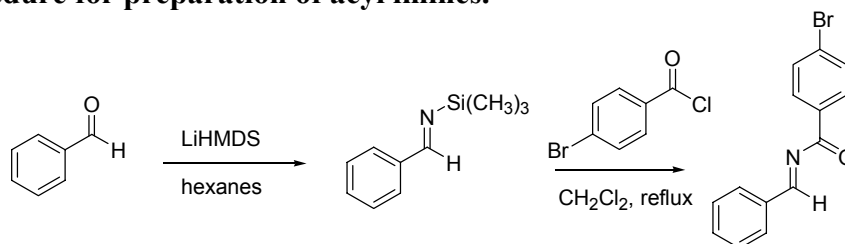

**Method A:** To a 100 mL flame-dried round bottom flask equipped with stir bar was added 1,1,1,3,3,3-hexamethyldisilazane (16 mL, 75.8 mmol) under Ar and cooled to  $0\text{ }^\circ\text{C}$ . *n*-BuLi (1.6 M in hexanes, 45.2 mL, 72.3 mmol) was added slowly using an air-tight syringe, and the reaction was warmed to room temperature for 15 minutes. The solution was cooled to  $0\text{ }^\circ\text{C}$  and benzaldehyde (7.0 mL, 68.8 mmol) was slowly added. The reaction was warmed to room temperature and stirred for 30 minutes. The hexane was rotavaped and the resulting slurry was

(1) (a) Wipf, P.; Jung, J-K. *J. Org. Chem.* **2000**, *20*, 6319. (b) McDougal, N. T.; Trevellini, W. L.; Rodgen, S. A.; Kliman, L. T.; Schaus, S. E. *Adv. Synth. Catal.* **2004**, *346*, 1231.

(2) Lou, S.; Moquist P. N. ; Schaus S. E. *J. Am. Chem. Soc.* **2006**, *128*, 12660.

(3) (a) Hart, D. J.; Kanai, K-I.; Thomas, D. G.; Y, T-K. *J. Org. Chem.* **1983**, *48*, 289. (b) Vidal, J.; Damaestoy, S.; Guy, L.; Hannachi, J-C.; Aubry, A.; Collet, A. *Chem. Eur. J.* **1997**, *3*, 1691.

distilled *in vacuo* to give silyl imine (bp 55 °C, 0.2 mm Hg) as a pale yellow liquid (10.3 g, 84.5% yield). A portion of the silyl imine distillate (4.27 g, 24.1 mmol) was dissolved in CH<sub>2</sub>Cl<sub>2</sub> (30 mL) and cooled to 0 °C. To the solution 4-bromobenzoyl chloride (5.02 g, 23.0 mmol) was added and the reaction mixture was refluxed for 3 hours. Upon cooling the solvent and TMSCl were removed under reduced pressure to afford the acyl imine as yellow solid (6.5 g, 99% yield). <sup>1</sup>H NMR spectra was in agreement with reported data.<sup>4</sup> Imines **8a-8i**, **10a-10l** were prepared using similar procedure.

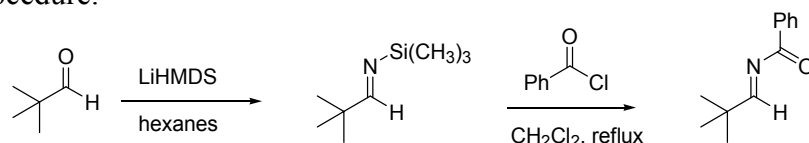

To a 100 mL flame-dried round bottom flask equipped with stir bar was added 1,1,1,3,3,3-hexamethyldisilazane (5.34 mL, 25.3 mmol) under Ar and cooled to 0 °C. *n*-BuLi (1.6 M in hexane, 15.1 mL, 24.1 mmol) was added slowly using an air-tight syringe, and the reaction was warmed to room temperature for 15 minutes. The solution was cooled to 0 °C and pivaldehyde (2.5 mL, 23.0 mmol) was slowly added. The reaction was warmed to room temperature and stirred for 30 minutes. The hexane was rotovaped and the resulting slurry was distilled *in vacuo* to give silyl imine (bp 65 °C, 30 Torr) as clear liquid. The resulting silyl imine (2.82g, 78% yield) was dissolved CH<sub>2</sub>Cl<sub>2</sub> (30 mL) and cooled to 0 °C. To the solution benzoyl chloride (1.97mL, 17.0 mmol) was added and the reaction was refluxed for 3 hours. Upon cooling the solvent and TMSCl were removed under reduced pressure to afford the acyl imine as clear oil (3.2 g, 99% yield). <sup>1</sup>H NMR (400 MHz, CDCl<sub>3</sub>): δ 7.94 (d, *J* = 8.0 Hz, 2H), 7.92 (s, 1H), 7.50 (t, *J* = 7.2 Hz, 1H), 7.38 (t, *J* = 8.0 Hz, 2H), 1.15 (s, 9H). <sup>13</sup>C NMR (75.0 MHz, CDCl<sub>3</sub>): δ 181.2, 175.7, 135.6, 133.5, 130.1, 128.7, 26.4.

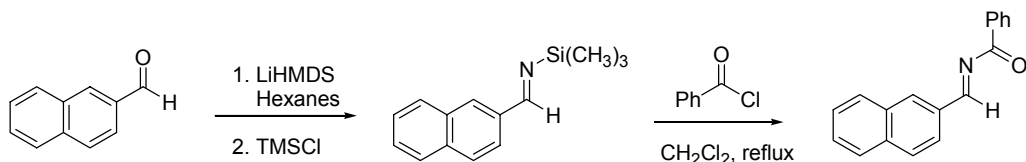

**Method B:** To a 100 mL flame-dried round bottom flask equipped with stir bar was added 1,1,1,3,3,3-hexamethyldisilazane (4.46 mL, 21.1 mmol) under Ar and cooled to 0 °C. *n*-BuLi (1.6 M in hexane, 12.6 mL, 20.2 mmol) was added slowly using an air-tight syringe, and the reaction was warmed to room temperature for 15 minutes. The solution was cooled to 0 °C and 2-naphthaldehyde (3.0 g, 19.2 mmol) was slowly added. The reaction was stirred at room temperature for 30 minutes then cooled to 0 °C. TMSCl (2.44 mL, 19.2 mmol) was added slowly and the resulting reaction mixture was stirred at room temperature for 2 hours. The precipitate was filtered through a celite bed. The filtrate was concentrated *in vacuo* and diluted with CH<sub>2</sub>Cl<sub>2</sub> (30 mL). Benzoyl chloride (2.1 mL, 18.2 mmol) was added and the reaction mixture was refluxed overnight. The solvent and TMSCl were removed under reduced pressure to afford the acyl imine as yellow solid (4.8 g, 96% yield). <sup>1</sup>H NMR (400 MHz, CDCl<sub>3</sub>): δ 8.94 (s, 1H), 8.29 (s, 1H), 8.23 (d, *J* = 7.2 Hz, 2H), 8.19 (d, *J* = 8.8 Hz, 1H), 7.95 (t, *J* = 7.8 Hz, 2H), 7.89 (t, *J* = 8.0 Hz, 1H), 7.60 (m, 3H), 7.50 (t, *J* = 8.0 Hz, 2H). <sup>13</sup>C NMR (75.0 MHz, CDCl<sub>3</sub>): δ 179.6, 163.4, 134.6, 132.6, 132.2, 131.5, 131.0, 128.9, 127.8, 127.6, 127.2, 127.1, 126.6, 125.6, 122.4.

(4) Uraguchi, D.; Sorimachi, K.; Terada, M. *J. Am. Chem. Soc.* **2005**, *127*, 9360.

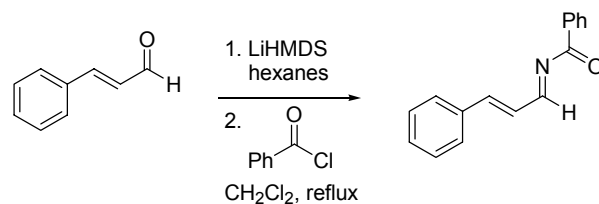

**Method C:** To a 100 mL flame-dried round bottom flask equipped with stir bar was added 1,1,1,3,3,3-hexamethyldisilazane (5.53 mL, 26.2 mmol) under Ar and cooled to 0 °C. *n*-BuLi (1.6 M in hexane, 15.6 mL, 25.0 mmol) was added slowly using an air-tight syringe, and the reaction was warmed to room temperature for 15 minutes. The solution was cooled to 0 °C and *trans*-cinnamaldehyde (3.0 mL, 23.8 mmol) was added. The reaction was stirred at room temperature for 30 minutes and the hexane was removed *in vacuo*. The resulting slurry was diluted with 30 mL CH<sub>2</sub>Cl<sub>2</sub> and benzoyl chloride (2.63 mL, 22.6 mmol) was added. The reaction mixture was refluxed for overnight. Upon cooling hexanes (10 mL) was added and the precipitate was filtered through a celite bed. The filtrate was concentrated and the residue was dried under reduced pressure to afford the acyl imine as orange solid (4.5 g, 98% yield). This product was used in the allylboration reaction without further purification. <sup>1</sup>H NMR (400 MHz, CDCl<sub>3</sub>): δ 8.48 (d, *J* = 9.2 Hz, 1H), 8.09 (d, *J* = 8.0 Hz, 2H), 7.52-7.31 (m, 4H), 6.98 (dd, *J* = 16, 9.2 Hz, 1H). <sup>13</sup>C NMR (75.0 MHz, CDCl<sub>3</sub>): δ 180.8, 166.3, 149.9, 134.9, 133.6, 130.8, 130.3, 129.2, 128.6, 128.3, 126.9.

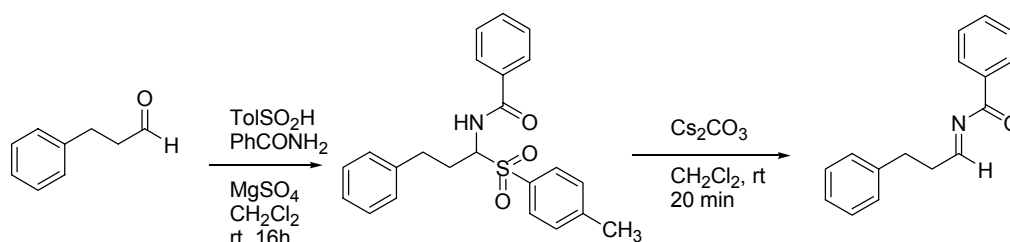

**Method D:**<sup>5</sup> To a 100 mL round bottom flask equipped with stir bar was added flame dried magnesium sulfate (12 g, 100 mmol), benzamide (1.21 g, 10 mmol), and *p*-toluene sulfonic acid (1.56 g, 10 mmol). CH<sub>2</sub>Cl<sub>2</sub> (20 mL) and 3-phenylpropanal (1.31 mL, 10 mmol) were added subsequently and the reaction mixture was stirred at room temperature for 16 h. The solution was diluted with CH<sub>2</sub>Cl<sub>2</sub> (20 mL) and filtered through a celite bed. The filtrate was concentrated under reduced pressure to afford the  $\alpha$ -amido sulfone as white solid (3.9 g, 99% yield). <sup>1</sup>H NMR (400 MHz, CDCl<sub>3</sub>): δ 7.71 (d, *J* = 8.4 Hz, 2H), 7.57 (d, *J* = 8.0 Hz, 2H), 7.49 (t, *J* = 7.6 Hz, 1H), 7.37 (t, *J* = 8.0 Hz, 2H), 7.25-7.18 (m, 5H), 7.15 (t, *J* = 6.8 Hz, 2H), 6.95 (d, *J* = 10.0 Hz, 1H), 5.49 (td, *J* = 10.8, 3.2 Hz, 1H), 2.84-2.78 (m, 2H), 2.65 (m, 1H), 2.37 (s, 3H), 2.29 (m, 1H).

To a round bottom flask equipped with stir bar was added flame-dried cesium carbonate (1.63 g, 5.0 mmol) and CH<sub>2</sub>Cl<sub>2</sub> (20 mL). The solution was vigorously stirred (>800 rpm) and  $\alpha$ -amido sulfone (393 mg, 1.0 mmol) was added. The reaction mixture was stirred at room temperature for 10 min. The mixture was diluted with hexanes (20 mL), filtered through a celite bed and washed with CH<sub>2</sub>Cl<sub>2</sub> (20 mL). The filtrate was concentrated under reduced pressure to afford the acyl imine as yellow oil (230 mg, 96% yield). This acyl imine was used in the allylboration reaction

(5) (a) Song, J.; Wang, Y.; Deng, L. *J. Am. Chem. Soc.* **2006**, *128*, 6048. (b) Trost, B. M.; Jaratjaroonphong, J.; Reutrakul, V. *J. Am. Chem. Soc.* **2006**, *128*, 2778. (c) Mataloni, M.; Petrini, M.; Profeta, R. *Synlett*, **2003**, 1129. (d) Murry, J. A.; Frantz, D. E.; Soheili, A.; Tillyer, R.; Grabowski, E. J. J.; Reider, P. J. *J. Am. Chem. Soc.* **2001**, *123*, 9696-9697.

immediately.  $^1\text{H NMR}$  (400 MHz,  $\text{CDCl}_3$ ):  $\delta$  8.16 (t,  $J = 4.4$  Hz, 1H), 7.87 (d,  $J = 8.4$  Hz, 2H), 7.52 (t,  $J = 8.0$  Hz, 1H), 7.39 (t,  $J = 8.4$  Hz, 2H), 7.22 (m, 5H), 3.05 (t,  $J = 7.6$  Hz, 2H), 2.97 (t,  $J = 7.6$  Hz, 2H).  $^{13}\text{C NMR}$  (75.0 MHz,  $\text{CDCl}_3$ ):  $\delta$  181.0, 168.5, 140.2, 133.6, 130.1, 129.3, 128.8, 128.3, 126.5, 38.0, 31.9.

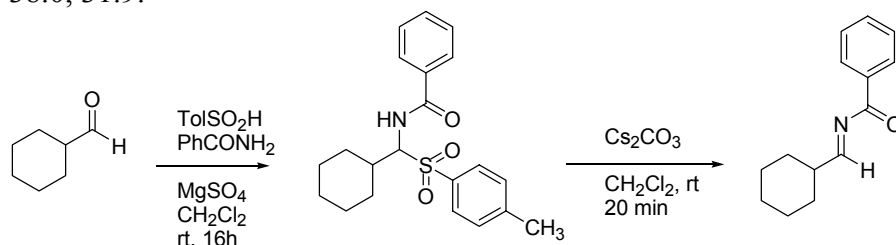

To a round bottom flask equipped with stir bar was added flame-dried magnesium sulfate (12 g, 100 mmol), benzamide (1.21 g, 10 mmol), and *p*-toluene sulfonic acid (1.56 g, 10 mmol).  $\text{CH}_2\text{Cl}_2$  (20 mL) and cyclohexanecarboxaldehyde (1.21 mL, 10 mmol) were added subsequently and the reaction mixture was stirred at room temperature for 16 h. The solution was diluted with  $\text{CH}_2\text{Cl}_2$  (20 mL) and filtered through a celite bed. The filtrate was concentrated under reduced pressure to afford the  $\alpha$ -amido sulfone as white solid (3.7 g, 99% yield).  $^1\text{H NMR}$  (400 MHz,  $\text{CDCl}_3$ ):  $\delta$  7.72 (d,  $J = 8.4$  Hz, 2H), 7.61 (d,  $J = 8.0$  Hz, 2H), 7.53 (t,  $J = 8.0$  Hz, 1H), 7.43 (t,  $J = 8.4$  Hz, 2H), 7.23 (d,  $J = 8.0$  Hz, 2H), 6.59 (d,  $J = 10.4$  Hz, 1H), 5.29 (dd,  $J = 10.8, 3.6$  Hz, 1H), 2.57 (m, 1H), 2.36 (s, 3H), 2.20 (d,  $J = 24$  Hz, 1H), 1.89 (d,  $J = 24$  Hz, 1H), 1.79 (t,  $J = 24$  Hz, 2H), 1.68 (d,  $J = 24$  Hz, 1H), 1.38 (m, 2H), 1.18 (m, 2H).

To a round bottom flask equipped with stir bar was added flame-dried cesium carbonate (1.63 g, 5.0 mmol) and  $\text{CH}_2\text{Cl}_2$  (20 mL). The solution was vigorously stirred ( $>800$  rpm) and  $\alpha$ -amido sulfone (371 mg, 1.0 mmol) was added. The reaction mixture was stirred at room temperature for 20 min. The solution was diluted with hexanes (20 mL) and filtered through a celite bed and washed with  $\text{CH}_2\text{Cl}_2$  (20 mL). The filtrate was concentrated under reduced pressure to afford the desired acyl imine as a white solid (210 mg, 95% yield). This imine was used in the allylboration reaction immediately.  $^1\text{H NMR}$  (400 MHz,  $\text{CDCl}_3$ ):  $\delta$  7.99 (d,  $J = 4$  Hz, 1H), 7.90 (d,  $J = 8.0$  Hz, 2H), 7.54 (t,  $J = 7.2$  Hz, 1H), 7.42 (t,  $J = 8.0$  Hz, 2H), 2.36 (m, 1H), 1.96 (m, 2H), 1.79 (m, 2H), 1.69 (m, 1H), 1.35 (m, 4H), 1.25 (m, 1H).  $^{13}\text{C NMR}$  (75.0 MHz,  $\text{CDCl}_3$ ):  $\delta$  180.8, 172.6, 133.2, 129.7, 128.3, 44.2, 28.7, 25.8, 25.2.

### *N*-(2-(benzyloxy)-1-tosylethyl)benzamide

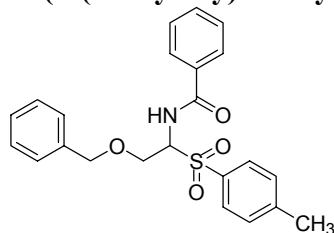

Following method D, this compound was prepared as white solid (1.35 g, 5.0 mmol, 99% yield).  $^1\text{H NMR}$  (400 MHz,  $\text{CDCl}_3$ ):  $\delta$  7.77 (d,  $J = 8.0$  Hz, 2H), 7.65 (d,  $J = 8.0$  Hz, 2H), 7.51 (t,  $J = 8.0$  Hz, 1H), 7.39 (t,  $J = 8.0$  Hz, 2H), 7.24 (d,  $J = 8.0$  Hz, 2H), 7.20 (m, 5H), 7.18 (d,  $J = 10.0$  Hz, 1H), 5.64 (m, 1H), 4.62 (d,  $J = 11.6$  Hz, 1H), 4.56 (d,  $J = 11.6$  Hz, 1H), 4.28 (dd,  $J = 10.8, 4.0$  Hz, 1H), 3.96 (dd,  $J = 10.8, 4.0$  Hz, 1H), 2.37 (s, 3H);  $^{13}\text{C NMR}$  (75.0 MHz,  $\text{CDCl}_3$ ):  $\delta$  166.7, 145.5, 137.3, 134.7, 133.1, 132.5, 130.1, 129.3, 128.9, 128.7, 128.2, 128.1, 127.4, 73.9, 68.8, 65.9, 21.9.

**(E)-N-(2-(benzyloxy)ethylidene)benzamide (9p)**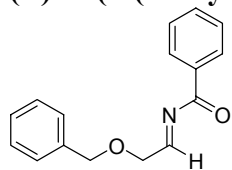

To a round bottom flask equipped with stir bar was added flame-dried cesium carbonate (163 mg, 0.5 mmol) and CH<sub>2</sub>Cl<sub>2</sub> (4.0 mL). The mixture was vigorously stirred (>800 rpm) and  $\alpha$ -amido sulfone (104 mg, 0.25 mmol) was added. The reaction mixture was stirred at room temperature for 30 min. The solution was diluted with hexanes (4.0 mL) and filtered through a celite bed and washed with CH<sub>2</sub>Cl<sub>2</sub> (4.0 mL). Toluene (2.5 mL) was added to the filtrate and the solvent was concentrated under reduced pressure to afford the desired imine in a toluene solution which was used in the allylation reaction immediately. <sup>1</sup>H NMR (400 MHz, CDCl<sub>3</sub>):  $\delta$  8.04 (t, *J* = 2.8 Hz, 1H), 7.91 (d, *J* = 8.0 Hz, 2H), 7.47 (t, *J* = 8.0 Hz, 1H), 7.37 (t, *J* = 8.0 Hz, 2H), 7.21 (m, 5H), 4.69 (d, *J* = 1.2 Hz, 1H), 4.67 (d, *J* = 1.2 Hz, 1H), 4.37 (d, *J* = 1.2 Hz, 1H), 4.35 (d, *J* = 1.2 Hz, 1H).

**(Z)-N-(1-tosylhept-4-enyl)benzamide**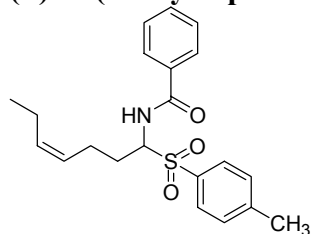

Following method D, this compound was prepared as white solid (1.35 g, 5.0 mmol, 99% yield). <sup>1</sup>H NMR (400 MHz, CDCl<sub>3</sub>):  $\delta$  7.73 (d, *J* = 8.0 Hz, 2H), 7.63 (d, *J* = 8.0 Hz, 2H), 7.45 (t, *J* = 8.0 Hz, 1H), 7.34 (t, *J* = 8.0 Hz, 2H), 7.23 (d, *J* = 8.0 Hz, 2H), 7.15 (d, *J* = 10.4 Hz, 1H), 5.45 (m, 2H), 5.34 (m, 1H), 2.35 (s, 3H), 2.22-2.07 (m, 4H), 1.92 (m, 2H), 0.89 (t, *J* = 7.2 Hz, 3H); <sup>13</sup>C NMR (75.0 MHz, CDCl<sub>3</sub>):  $\delta$  166.9, 145.3, 134.5, 134.0, 133.2, 132.3, 130.0, 129.3, 128.8, 127.4, 126.5, 69.4, 28.6, 26.7, 25.7, 21.9, 13.9.

**(E)-N-((Z)-hept-4-enylidene)benzamide (9p)**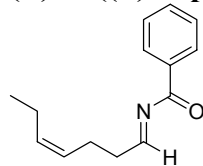

To a round bottom flask equipped with stir bar was added flame-dried cesium carbonate (163 mg, 0.5 mmol) and CH<sub>2</sub>Cl<sub>2</sub> (4 mL). The solution was vigorously stirred (>800 rpm) and  $\alpha$ -amido sulfone (96 mg, 0.25 mmol) was added. The reaction mixture was stirred at room temperature for 30 min. The solution was diluted with hexanes (4 mL) and filtered through a celite bed and washed with CH<sub>2</sub>Cl<sub>2</sub> (4 mL). The filtrate was concentrated under reduced pressure at 20 °C to afford the desired imine as clear oil (51 mg, 96%yield). <sup>1</sup>H NMR (400 MHz, CDCl<sub>3</sub>):  $\delta$  8.04 (t, *J* = 4.4 Hz, 1H), 7.93 (d, *J* = 8.0 Hz, 2H), 7.47 (t, *J* = 8.0 Hz, 1H), 7.37 (t, *J* = 8.0 Hz, 2H), 5.47 (m, 1H), 5.39 (m, 1H), 2.47 (m, 1H), 2.34 (m, 2H), 1.94 (m, 2H), 0.88 (t, *J* = 7.2 Hz, 3H); <sup>13</sup>C NMR (75.0 MHz, CDCl<sub>3</sub>):  $\delta$  181.0, 169.4, 1333.9, 133.6, 130.1, 128.6, 127.1, 36.5, 28.1, 25.7, 13.9.

## Preparation of crotyldiisopropoxyboranes<sup>6</sup>

### (*E*)-but-2-enyldiisopropoxyborane (18a)

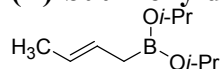

To a 250 mL flame-dried three-neck round bottom flask equipped with stir bar and thermometer was added *t*-BuOK (4.65 g, 41.5 mmol) and THF (40 mL) under Ar and cooled to  $-78\text{ }^{\circ}\text{C}$ . *trans*-2-Butene (2.50g, 44 mmol), condensed into a flame-dried rubber-stoppered flask at  $-78\text{ }^{\circ}\text{C}$ , was added to the mixture via cannula. *n*-BuLi (1.6 M in hexane, 26 mL, 41.5 mmol) was added drop wise over 1 hour using an addition funnel ensuring internal temperature did not rise. Upon completion, the reaction was warmed to an internal temperature of  $-52\text{ }^{\circ}\text{C}$ . The reaction was maintained at  $-52\text{ }^{\circ}\text{C}$  for 15 minutes, and cooled back to  $-78\text{ }^{\circ}\text{C}$ . Triisopropylborate (10.5 mL, 45.6 mmol) was then added drop wise over 0.5 hours by an addition funnel. The reaction mixture was maintained at  $-78\text{ }^{\circ}\text{C}$  for 2 hours and followed by a slow addition of HCl (2.0 M in Et<sub>2</sub>O, 41.5 mL, 83 mmol,). The solution was stirred for 0.5 hours and warmed to room temperature. Reaction was concentrated under reduced pressure to 25 mL and filtered. The filtrate was concentrated *in vacuo* and filtered again. The remaining oily product was dissolved in toluene and stored as 1.0 M solution at  $0\text{ }^{\circ}\text{C}$ . This solution was used in the crotylboration reaction without any further purification. The analytical sample was obtained by distillation under reduce pressure ( $90\text{ }^{\circ}\text{C}$ , 0.1 Torr) and the pure sample was sensitive to moisture. <sup>1</sup>H NMR (400 MHz, CDCl<sub>3</sub>):  $\delta$  5.43(m, 1H), 5.30 (m, 1H), 4.42-4.27 (m, 2H), 1.61 (br d,  $J = 6.0$  Hz, 2H), 1.56 (br d,  $J = 6.0$  Hz, 3H), 1.10 (d,  $J = 6.0$  Hz, 12H); <sup>13</sup>C NMR (75.0 MHz, CDCl<sub>3</sub>):  $\delta$  129.0, 128.2, 69.1, 24.6, 24.5, 18.1.

### (*Z*)-but-2-enyldiisopropoxyborane (18b)

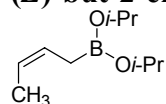

To a 250 mL flame-dried three-neck round bottom flask equipped with stir bar and thermometer was add *t*-BuOK (4.65 g, 41.5 mmol) and THF (40 mL) under Ar and cooled to  $-78\text{ }^{\circ}\text{C}$ . *cis*-2-Butene (2.50 g, 44 mmol), condensed into a flame-dried rubber-stoppered flask at  $-78\text{ }^{\circ}\text{C}$ , was added to the mixture via cannula. *n*-BuLi (1.6 M in hexane, 26 mL, 41.5 mmol) was added drop wise over 0.5 hours by an addition funnel ensuring internal temperature did not rise. Upon completion, the reaction was warmed to an internal temperature of  $-25\text{ }^{\circ}\text{C}$ . The solution was maintained at  $-25\text{ }^{\circ}\text{C}$  for 30 minutes, and cooled to  $-78\text{ }^{\circ}\text{C}$ . Triisopropylborate (10.5 mL, 45.6 mmol) was then added drop wise over 0.5 hours by an addition funnel. The reaction mixture was maintained at  $-78\text{ }^{\circ}\text{C}$  for 2 hours and followed by a slow addition of HCl (2.0 M in Et<sub>2</sub>O, 41.5 mL, 83 mmol, 2.0 M solution). The solution was stirred for 0.5 hours and warmed to room temperature. Reaction was concentrated under reduced pressure to 25 mL and filtered. The filtrate was concentrated *in vacuo* and filtered again. The remaining oily product was dissolved in toluene and stored as 1.0 M solution at  $0\text{ }^{\circ}\text{C}$ . This solution was used in the crotylboration reaction without any further purification. The analytical sample was obtained by distillation under reduce pressure ( $90\text{ }^{\circ}\text{C}$ , 0.1 Torr) and the pure sample was sensitive to moisture. <sup>1</sup>H NMR (400 MHz, CDCl<sub>3</sub>):  $\delta$  5.52 (m, 2H), 4.47 (m, 1H), 4.36 (m, 1H), 1.64 (br d,  $J = 7.2$  Hz, 2H), 1.58

(6) Roush, W. R.; Ando, K.; Powers, D. B.; Palkowitz, A. D.; Halterman, R. L. *J. Am. Chem. Soc.* **1990**, *112*, 6339

(br d,  $J = 6.0$  Hz, 3H), 1.18 (d,  $J = 6.0$  Hz, 12H);  $^{13}\text{C}$  NMR (75.0 MHz,  $\text{CDCl}_3$ ):  $\delta$  126.9, 124.8, 68.1, 24.8, 12.7.

### General procedure for asymmetric allylboration of acyl imines.

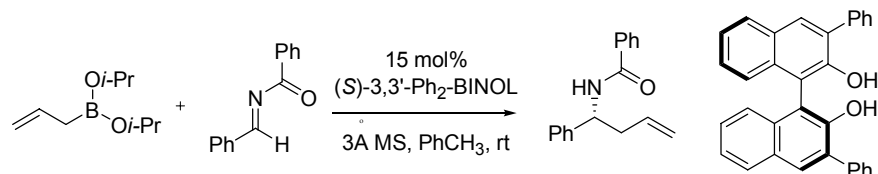

A 50 mL oven-dried round bottom flask was charged with stir bar and flushed with Ar. To the flask was added *N*-benzylidenebenzamide **5** (104 mg, 0.5 mmol), 3Å molecular sieves (500 mg), and (*S*)-3,3'-Ph<sub>2</sub>-BINOL **7h** (33 mg, 0.05 mol). The flask was fitted with a septum and placed under an atmosphere of Ar. To the flask was added toluene (3.0 mL) and the mixture was stirred at room temperature. Allyldiisopropoxyborane **4** (500  $\mu\text{L}$ , 0.50 mmol, 1.0 M in toluene) was added drop wise and the reaction mixture was stirred at room temperature for 24 hours. The reaction was diluted with ether (10 mL) and water (10 mL). The biphasic mixture was stirred at room temperature for 10 minutes. The organic layer was separated and dried over  $\text{Na}_2\text{SO}_4$ . The organic layer was isolated by filtration and the filtrate was concentrated *in vacuo* at 20 °C. The residue was purified by flash chromatography over silica gel (elution with 95:5 – 9:1, hexanes:EtOAc) to afford the homoallylic amide as a white solid (109 mg, 85% yield). The enantiomeric ratio of the product was determined to be 99:1 by chiral HPLC analysis.  $t_{\text{R}}$  minor: 5.9 min,  $t_{\text{R}}$  major: 9.1 min, [Chiralcel<sup>®</sup> OD column, 24cm  $\times$  4.6 mm I.D., hexanes:IPA 90:10, 1.5 mL/min].

### General procedure for preparation of racemic allylboration products.

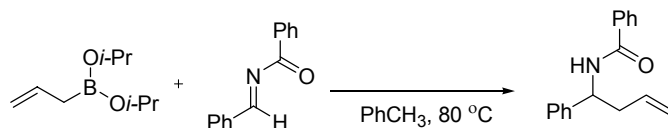

A 15  $\times$  100 mm oven-dried glass vessel was charged with stir bar and flushed with Ar. To the flask was added *N*-benzylidenebenzamide **5** (26.2 mg, 0.125 mmol) and toluene (0.5 mL). The mixture was stirred under Ar at room temperature and allyldiisopropoxyborane **4** (1.0 M in toluene, 125  $\mu\text{L}$ , 0.125 mmol) was added. The reaction mixture was heated to 80 °C and stirred for 12 hours. The reaction was diluted with ether (3.0 mL) and water (3.0 mL). The biphasic mixture was stirred at room temperature for 10 minutes. The organic layer was separated and dried over  $\text{Na}_2\text{SO}_4$ . After filtration, the filtrate was concentrated and the residue was purified by flash chromatography over silica gel (elution with 95:5 – 9:1, hexanes:EtOAc) to afford the homoallylic amide as a white solid.



## Absolute stereochemical determination of allylboration products.

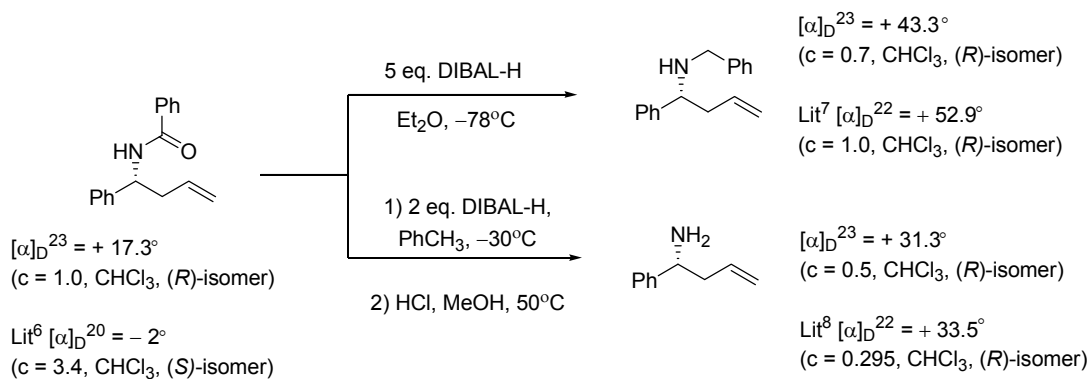

Direct stereochemical determination was assigned to *N*-((*R*)-1-phenylbut-3-enyl)benzamide **9a** by comparison of optical rotation to the known compound  $[\alpha]_D^{23} = +17.3^\circ$  (c = 1.0, CHCl<sub>3</sub>) Lit:<sup>7</sup>  $[\alpha]_D^{20} = -2.0^\circ$  (c = 3.4, CHCl<sub>3</sub>, (*S*)-isomer). In addition, **9a** was reduced by DIBAL-H to the known benzyl-(1-phenyl-but-3-enyl)-amine and optical rotation was in agreement with the (*R*)-isomer  $[\alpha]_D^{23} = +43.3^\circ$  (c = 0.7, CHCl<sub>3</sub>) Lit:  $[\alpha]_D^{22} = +52.9^\circ$  (c = 1.0, CHCl<sub>3</sub>, 93% ee).<sup>8</sup> Furthermore, reduction of amide followed by hydrolysis yielded corresponding homoallylic amine and optical rotation was in agreement literature value.  $[\alpha]_D^{23} = +31.3^\circ$  (c = 0.5, CHCl<sub>3</sub>) Lit:  $[\alpha]_D = +33.5^\circ$  (c = 0.295, CHCl<sub>3</sub>).<sup>9</sup>

**Experimental Detail.** A 50 mL flame-dried round bottom flask equipped with stir bar and flushed with Ar. *N*-(1-phenylbut-3-enyl)benzamide **9a** (62 mg, 0.25 mmol) was added, dissolved in CH<sub>2</sub>Cl<sub>2</sub> (2.0 mL) and cooled to -35 °C. Diisobutylaluminum hydride (5 mL, 0.5 mmol, 0.1 M in toluene) was slowly added in over 10 hours via syringe pump and stirred overnight. The reaction was quenched with MeOH (30 μL) and warmed to room temperature. To the reaction mixture was added NaF (60 mg), KOH(30 mg) and water (30 μL), and the resulting mixture was vigorously stirred for 1 hour. The solution was diluted with chloroform (10 mL) and filtered through a celite bed. The filtrate was dried over anhydrous Na<sub>2</sub>SO<sub>3</sub> and concentrated under reduced pressure. The residue was dissolved in MeOH (3.0 mL) and concentrated HCl (0.5 mL) and stirred at 50 °C overnight. The mixture was diluted with chloroform (6.0 mL) and water (6.0 mL) and pH adjusted to 12 with solid KOH. The organic layer was separated and aqueous layer was extracted with chloroform (2 × 10 mL). The combined organic layer was dried over Na<sub>2</sub>SO<sub>4</sub> and concentrated under reduced pressure. The residue was purified by flash chromatography over silica gel (elution with 98:2 – 9:1 CH<sub>2</sub>Cl<sub>2</sub>:MeOH) to afford the desired homoallylic amine as a clear oil (31 mg, 82% yield).

(7) Ding, H.; Friestad, G. *Angew Chem. Int. Ed.* **2001**, *40*, 4491.

(8) Fernandes, R.; Yamamoto, Y. *J. Org. Chem.* **2004**, *69*, 735.

(9) Berger, R.; Rabbat, P. M. A.; Leighton, J. L. *J. Am. Chem. Soc.* **2003**, *125*, 9596.

**Analytical data for homoallylic acyl amines.*****N*-((*R*)-1-phenylbut-3-enyl)benzamide (9a)**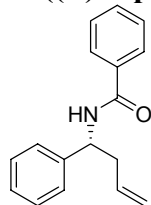

The reaction was run on 0.5 mmol scale and crude mixture was purified by flash column chromatography with elution by 95:5 – 9:1, hexanes:EtOAc. **Yield:** 112 mg, 85%; **er:** 99:1;  $[\alpha]_D^{23} = +17.3^\circ$  ( $c = 1.0$ ,  $\text{CHCl}_3$ ) Lit:  $[\alpha]_D^{20} = -2.0^\circ$  ( $c = 3.4$ ,  $\text{CHCl}_3$ , (*S*)-isomer); **mp:** 122-123 °C; **HPLC Analysis**,  $t_r$  minor: 5.94 min.,  $t_r$  major: 9.06 min., [Chiralcel<sup>®</sup>OD column, 24cm × 4.6 mm I.D., Hexanes:IPA = 90:10, 1.5 mL/min]; All spectra was in agreement with reported data.<sup>7</sup>

***N*-((*R*)-1-*p*-tolylbut-3-enyl)benzamide (9b)**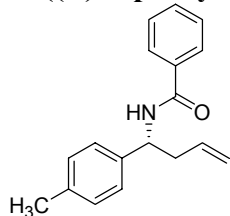

The crude mixture was purified by flash column chromatography with elution by 95:5 – 9:1, hexanes:EtOAc. **Yield:** 106 mg, 80%; **er:** 98:2;  $[\alpha]_D^{23} = +14.9^\circ$  ( $c = 1.0$ ,  $\text{CHCl}_3$ ); **mp:** 121-125 °C; **HPLC Analysis**,  $t_r$  minor: 6.49 min.,  $t_r$  major: 9.91 min., [Chiralcel<sup>®</sup>OD column, 24cm × 4.6 mm I.D., Hexanes:IPA = 90:10, 1.5 mL/min]; **<sup>1</sup>H NMR** (400 MHz,  $\text{CDCl}_3$ ):  $\delta$  7.76 (d,  $J = 8.0$  Hz, 2H), 7.48 (m, 3H), 7.39 (m, 4H), 6.46 (b, 1H), 5.76 (m, 1H), 5.28 (dd,  $J = 10.5, 6.8$  Hz, 1H), 5.15 (m, 2H) 2.69 (t,  $J = 6.8$  Hz, 2H) 2.41 (s, 3H) **<sup>13</sup>C NMR** (75.0 MHz,  $\text{CDCl}_3$ ):  $\delta$  168.1, 134.3, 131.8, 128.9, 128.8, 127.7, 127.2, 126.6, 118.8, 52.9, 40.87, 23.4 **IR** (thin film,  $\text{cm}^{-1}$ ): 3320, 3062, 3027, 2926, 2847, 1643, 1507, 1451, 1358, 1258, 1148 **HRMS:** calc'd for ( $M$ )<sup>+</sup>  $\text{C}_{18}\text{H}_{19}\text{NO}$ : 266.1500; found: 266.1489.

***N*-((*R*)-1-(4-bromophenyl)but-3-enyl)benzamide (9c)**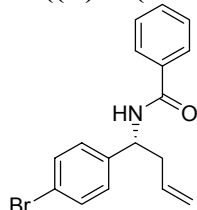

The crude mixture was purified by flash column chromatography with elution by 95:5 – 85:15, hexanes:EtOAc. **Yield:** 141 mg, 86%; **er:** 97.5:2.5;  $[\alpha]_D^{23} = +12.5^\circ$  ( $c = 1.0$ ,  $\text{CHCl}_3$ ); **mp:** 125-128 °C; **HPLC Analysis**,  $t_r$  major: 6.7 min.,  $t_r$  minor: 9.1 min., [Chiralcel<sup>®</sup>OD column, 24cm × 4.6 mm I.D., Hexanes:IPA = 90:10, 1.5 mL/min]; **<sup>1</sup>H NMR** (400 MHz,  $\text{CDCl}_3$ ):  $\delta$  7.76 (d,  $J = 8.0$  Hz, 2H), 7.53 – 7.41 (m, 5H), 7.22 (d,  $J = 8.4$  Hz, 2H), 6.43 (d,  $J = 7.2$  Hz, 1H), 5.75 (m, 1H), 5.25 – 5.15 (m, 3H), 2.65 (t,  $J = 6.8$  Hz, 2H); **<sup>13</sup>C NMR** (75.0 MHz,  $\text{CDCl}_3$ ):  $\delta$  166.9, 141.0, 134.5, 133.8, 132.0, 131.9, 128.9, 128.4, 127.1, 121.4, 119.1, 52.5, 40.7; **IR** (thin film,  $\text{cm}^{-1}$ ):

3311, 3065, 2924, 1634, 1527, 1296, 1066, 1007, 920, 817, 696; **HRMS**: calc'd for (M+1)<sup>+</sup> C<sub>17</sub>H<sub>17</sub>BrNO: 330.0494; found: 330.0492.

***N*-((*R*)-1-(4-methoxyphenyl)but-3-enyl)benzamide (9d)**

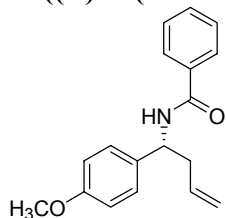

The crude mixture was purified by flash column chromatography with elution by 98:2 – 95:5, hexanes:EtOAc. **Yield**: 120 mg, 85%; **er**: 95:5;  $[\alpha]_D^{23} = +17.7^\circ$  ( $c = 1.0$ , CHCl<sub>3</sub>); **mp**: 122–124 °C; **HPLC Analysis**,  $t_r$  major: 7.8 min.,  $t_r$  minor: 9.4 min., [Chiralcel<sup>®</sup>OD column, 24cm × 4.6 mm I.D., Hexanes:IPA = 90:10 1.5mL/min]; **<sup>1</sup>H NMR** (400 MHz, CDCl<sub>3</sub>): δ 7.77 (d,  $J = 8.0$  Hz, 1H), 7.49 (m, 1H), 7.42 (m, 2H), 7.28 (d,  $J = 8.8$  Hz, 2H), 6.88 (d,  $J = 8.8$  Hz, 2H), 6.37 (d,  $J = 6.8$  Hz, 1H), 5.77 (m, 1H), 5.25 (dd,  $J = 10.4, 6.8$  Hz, 1H), 5.13 (m, 2H), 3.80 (s, 3H), 2.68 (m, 2H); **<sup>13</sup>C NMR** (75.0 MHz, CDCl<sub>3</sub>): δ 166.4, 155.3, 134.4, 131.7, 128.8, 127.8, 127.1, 118.5, 114.3, 55.5, 52.5, 40.7; **IR** (thin film, cm<sup>-1</sup>): 3310, 3063, 2948, 2842, 1645, 1521, 1253, 1177, 1032, 925, 824, 706; **HRMS**: calc'd for (M+1)<sup>+</sup> C<sub>18</sub>H<sub>20</sub>NO<sub>2</sub>: 282.1494; found: 282.1497.

***N*-((*R*)-1-(4-fluorophenyl)but-3-enyl)benzamide (9e)**

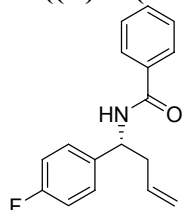

The crude mixture was purified by flash column chromatography with elution by 98:2 – 95:5, hexanes:EtOAc. **Yield**: 124 mg, 92%. **er**: 98:2;  $[\alpha]_D^{23} = +16.9^\circ$  ( $c = 1.0$ , CHCl<sub>3</sub>); **mp**: 92–95 °C; **HPLC Analysis**,  $t_r$  major: 5.7 min.,  $t_r$  minor: 7.3 min., [Chiralcel<sup>®</sup>OD column, 24cm × 4.6 mm I.D., Hexanes:IPA = 90:10 1.5mL/min]; **<sup>1</sup>H NMR** (400 MHz, CDCl<sub>3</sub>): δ 7.76 (d,  $J = 8.0$  Hz, 2H), 7.53 (m, 1H), 7.44 (t,  $J = 8.0$  Hz, 2H), 7.32 (m, 2H), 7.04 (t,  $J = 8.4$  Hz, 2H), 6.40 (d,  $J = 6.8$  Hz, 1H), 5.76 (m, 1H), 5.26 (dd,  $J = 14.4, 6.8$  Hz, 1H), 5.22–5.14 (m, 2H), 2.67 (t,  $J = 6.8$  Hz, 1H); **<sup>13</sup>C NMR** (75.0 MHz, CDCl<sub>3</sub>): δ 163.1, 157.2, 143.1, 133.9, 131.8, 128.8, 128.3, 128.2, 127.1, 119.0, 115.8, 115.6, 52.3, 40.9; **IR** (thin film, cm<sup>-1</sup>): 3308, 3068, 2925, 1642, 1518, 1226, 1058, 919, 830, 697; **HRMS**: calc'd for (M+1)<sup>+</sup> C<sub>17</sub>H<sub>16</sub>FNO: 270.1294; found: 270.1277.

***N*-((*R*)-1-(2-fluorophenyl)but-3-enyl)benzamide (9f)**

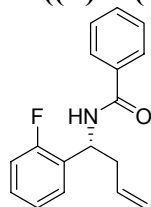

The crude mixture was purified by flash column chromatography with elution by 98:2 – 95:5, hexanes:EtOAc. **Yield**: 117 mg, 87% **er**: 95.5:4.5;  $[\alpha]_D^{23} = +15.8^\circ$  ( $c = 1.0$ , CHCl<sub>3</sub>); **mp**: 157–161 °C; **HPLC Analysis**,  $t_r$  major: 4.7 min.,  $t_r$  minor: 6.3 min., [Chiralcel<sup>®</sup>OD column,

24cm × 4.6 mm I.D., Hexanes:IPA = 90:10 1.5mL/min]; <sup>1</sup>H NMR (400 MHz, CDCl<sub>3</sub>): δ 7.80 (d, *J* = 8.0 Hz, 1H), 7.58 (m, 1H), 7.50 (m, 2H), 7.31 (m, 1H), 7.17 (m, 1H), 7.10 (m, 1H), 6.88 (d, *J* = 6.8 Hz, 1H), 5.75 (m, 1H), 5.13 (m, 2H), 2.70 (dd, *J* = 13.2, 6.8 Hz, 2H); <sup>13</sup>C NMR (75.0 MHz, CDCl<sub>3</sub>): δ 166.9, 159.3, 134.1, 132.1, 130.3, 129.3, 129.2, 128.8, 127.3, 127.1, 124.5, 118.7, 116.2, 116.0, 50.0, 40.1; IR (thin film, cm<sup>-1</sup>): 3443, 3282, 3058, 1658, 1511, 1286, 1222, 1039, 750; HRMS: calc'd for (M+)<sup>+</sup> C<sub>17</sub>H<sub>17</sub>FNO: 270.1294; found: 270.1259.

### *N*-((*R*)-1-(3-(trifluoromethyl)phenyl)but-3-enyl)benzamide (9g)

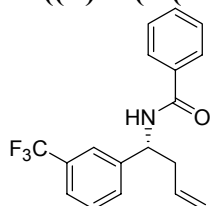

The crude mixture was purified by flash column chromatography with elution by 95:5 – 9:1, hexanes:EtOAc. **Yield:** 143 mg, 90%; **er:** 97.5:2.5; [ $\alpha$ ]<sub>D</sub><sup>23</sup> = +19.0° (c = 1.0, CHCl<sub>3</sub>); **mp:** 64–67 °C; **HPLC Analysis**, t<sub>r</sub> major: 4.8 min., t<sub>r</sub> minor: 7.3 min., [Chiralcel<sup>®</sup>OD column, 24cm × 4.6 mm I.D., Hexanes:IPA = 90:10, 1.5 mL/min]; <sup>1</sup>H NMR (400 MHz, CDCl<sub>3</sub>): δ 7.77 (d, *J* = 8.0 Hz, 2H), 7.59 (s, 1H), 7.53 (m, 3H), 7.45 (m, 3H), 6.49 (d, *J* = 6.0 Hz, 1H), 5.76 (m, 1H), 5.32 (dd, *J* = 13.2, 6.0 Hz, 1H), 5.25–5.18 (m, 2H), 2.68 (m, 1H); <sup>13</sup>C NMR (75.0 MHz, CDCl<sub>3</sub>): δ 166.7, 142.8, 134.1, 133.3, 131.8, 129.9, 129.1, 128.7, 126.9, 124.3, 122.9, 119.2, 52.4, 40.6; IR (thin film, cm<sup>-1</sup>): 3301, 3068, 2932, 1643, 1531, 1323, 1166, 919, 802, 701; HRMS: calc'd for (M+)<sup>+</sup> C<sub>18</sub>H<sub>17</sub>F<sub>3</sub>NO: 320.1262; found: 320.1254.

### *N*-((*R*)-1-(furan-2-yl)but-3-enyl)benzamide (9h)

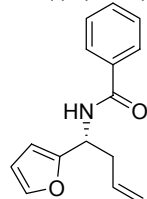

The reaction was run in 0.125 mmol scale and the crude mixture was purified by flash column chromatography with elution by 98:2 – 95:5, hexanes:EtOAc. **Yield:** 25 mg, 83%; **er:** 96:4; [ $\alpha$ ]<sub>D</sub><sup>23</sup> = +75.0° (c = 0.5, CHCl<sub>3</sub>); **HPLC Analysis**, t<sub>r</sub> major: 4.8 min., t<sub>r</sub> minor: 5.5 min., [Chiralcel<sup>®</sup>OD column, 24cm × 4.6 mm I.D., Hexanes:IPA = 90:10 1.5mL/min]; <sup>1</sup>H NMR (400 MHz, CDCl<sub>3</sub>): δ 7.77 (d, *J* = 8.0 Hz, 2H), 7.51 (m, 1H), 7.44 (m, 2H), 7.38 (s, 1H), 6.40 (d, *J* = 7.2 Hz, 1H), 6.33 (s, 1H), 6.25 (s, 1H), 5.78 (m, 1H), 5.42 (dd, *J* = 14.4, 7.2 Hz, 1H), 5.18–5.11 (m, 2H), 2.72 (m, 2H); <sup>13</sup>C NMR (75.0 MHz, CDCl<sub>3</sub>): δ 167.1, 151.1, 142.2, 133.7, 131.8, 129.2, 127.2, 118.8, 110.5, 106.8, 47.2, 38.6; IR (thin film, cm<sup>-1</sup>): 3306, 3072, 2928, 1643, 1531, 1291, 1143, 1004, 921, 703; HRMS: calc'd for (M)<sup>+</sup> C<sub>15</sub>H<sub>15</sub>NO<sub>2</sub>: 241.1103; found: 241.1035.

***N*-((*R*)-1-(thiophen-2-yl)but-3-enyl)benzamide (9i)**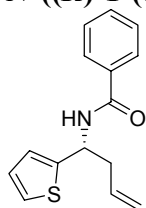

The crude mixture was purified by flash column chromatography with elution by 98:2 – 95:5, hexanes:EtOAc. **Yield:** 105 mg, 82%; **er:** 95:5;  $[\alpha]_D^{23} = +51.8^\circ$  ( $c = 0.5$ ,  $\text{CHCl}_3$ ); **mp:** 74–76 °C; **HPLC Analysis**,  $t_r$  major: 6.3 min.,  $t_r$  minor: 9.6 min., [Chiralcel<sup>®</sup>OD column, 24cm × 4.6 mm I.D., Hexanes:IPA = 90:10 1.5mL/min]; **<sup>1</sup>H NMR** (400 MHz,  $\text{CDCl}_3$ ):  $\delta$  7.78 (d,  $J = 8.0$  Hz, 1H), 7.51 (m, 1H), 7.43 (m, 2H), 7.23 (d,  $J = 5.2$  Hz, 1H), 7.03 (m, 1H), 6.97 (dd,  $J = 5.2$ , 3.6 Hz, 1H), 6.40 (d,  $J = 6.8$  Hz, 1H), 5.85 (m, 1H), 5.62 (dd,  $J = 14.8$ , 6.8 Hz, 1H), 5.19 (m, 2H), 2.78 (dd,  $J = 6.8$  Hz, 2H); **<sup>13</sup>C NMR** (75.0 MHz,  $\text{CDCl}_3$ ):  $\delta$  164.6, 133.7, 131.8, 128.8, 127.2, 124.7, 119.1, 48.8, 41.0; **IR** (thin film,  $\text{cm}^{-1}$ ): 3305, 3071, 2925, 1648, 1532, 1393, 1294, 1055, 922, 702; **HRMS:** calc'd for  $(\text{M}+\text{Na})^+$   $\text{C}_{15}\text{H}_{15}\text{NONaS}$ : 280.0772; found: 280.0761.

***N*-((*R*)-1-(naphthalen-3-yl)but-3-enyl)benzamide (9j)**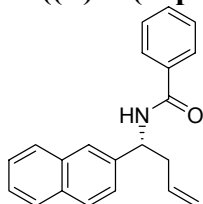

The reaction was run in 0.125 mmol scale and the crude mixture was purified by flash column chromatography with elution by 98:2 – 95:5, hexanes:EtOAc. **Yield:** 33 mg, 88%; **er:** 96:4;  $[\alpha]_D^{23} = +14.9^\circ$  ( $c = 0.8$ ,  $\text{CHCl}_3$ ); **mp:** 72–75 °C; **HPLC Analysis**,  $t_r$  major: 8.9 min.,  $t_r$  minor: 15.9 min., [Chiralcel<sup>®</sup>OD column, 24cm × 4.6 mm I.D., Hexanes:IPA = 90:10 1.5mL/min]; **<sup>1</sup>H NMR** (400 MHz,  $\text{CDCl}_3$ ):  $\delta$  8.0–7.78 (m, 6H), 7.69–7.42 (m, 6H), 7.29 (m, 1H), 6.55 (m, 1H), 5.83 (m, 1H), 5.47 (m, 1H), 5.27–5.13 (m, 2H), 2.81 (m, 2H); **<sup>13</sup>C NMR** (75.0 MHz,  $\text{CDCl}_3$ ):  $\delta$  167.6, 134.8, 134.2, 131.8, 128.9, 128.8, 128.2, 127.9, 127.2, 126.5, 126.2, 125.4, 124.9, 118.8, 53.0, 40.7; **IR** (thin film,  $\text{cm}^{-1}$ ): 3302, 3056, 2972, 2927, 1648, 1521, 1333, 1271, 1128, 1055, 926, 817, 702; **HRMS:** calc'd for  $(\text{M})^+$   $\text{C}_{21}\text{H}_{19}\text{NONa}$ : 324.1364; found: 324.1393.

***N*-((*R,E*)-1-phenylhexa-1,5-dien-3-yl)benzamide (9k)**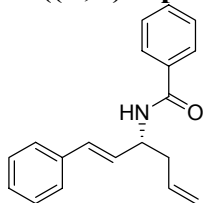

The crude mixture was purified by flash column chromatography with elution by 98:2 – 9:1, hexanes:EtOAc. **Yield:** 111 mg, 82%; **er:** 95.5:4.5;  $[\alpha]_D^{23} = +26.6^\circ$  ( $c = 0.5$ ,  $\text{CHCl}_3$ ); **mp:** 97–100 °C; **HPLC Analysis**,  $t_r$  minor: 11.8 min.,  $t_r$  minor: 14.5 min., [Chiralcel<sup>®</sup>OD column, 24cm × 4.6 mm I.D., Hexanes:IPA = 90:10 1.5mL/min]; **<sup>1</sup>H NMR** (400 MHz,  $\text{CDCl}_3$ ):  $\delta$  7.79 (d,  $J = 8.8$  Hz, 2H), 7.51 (t,  $J = 8.4$  Hz, 1H), 7.45 (t,  $J = 8.0$  Hz, 2H), 7.36 (d,  $J = 8.4$  Hz, 2H), 7.30 (t,  $J = 8.0$  Hz, 2H), 7.25 (m, 1H), 6.59 (d,  $J = 16$  Hz, 1H), 6.24 (dd,  $J = 16$ , 6.0 Hz, 1H), 6.21 (d,  $J = 6.8$  Hz, 1H), 5.87 (m, 1H), 5.21 (d,  $J = 16$  Hz, 1H), 5.18 (d,  $J = 13.6$  Hz, 1H), 4.96

(m, 1H), 2.55 (t,  $J = 6.4$  Hz, 2H);  $^{13}\text{C}$  NMR (75.0 MHz,  $\text{CDCl}_3$ ):  $\delta$  166.9, 136.8, 134.8, 134.1, 131.7, 131.0, 129.3, 128.8, 127.9, 127.1, 126.7, 118.9, 50.5, 39.7; IR (thin film,  $\text{cm}^{-1}$ ): 3303, 3063, 2924, 1638, 1534, 1306, 973, 920, 701; HRMS: calc'd for  $(\text{M}+\text{Na})^+$   $\text{C}_{19}\text{H}_{19}\text{NONa}$ : 300.1364; found: 300.1364.

### *N*-((*S*)-1-phenylhex-5-en-3-yl)benzamide (9l)

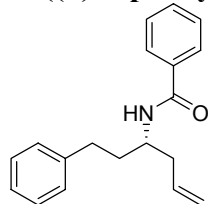

The crude mixture was purified by flash column chromatography with elution by 98:2 – 9:1, hexanes:EtOAc. **Yield:** 115 mg, 83%; **er:** 99.5:0.5;  $[\alpha]_{\text{D}}^{23} = +3.2^\circ$  ( $c = 1.0$ ,  $\text{CHCl}_3$ ); **HPLC Analysis**,  $t_{\text{r}}$  major: 8.1 min.,  $t_{\text{r}}$  minor: 10.0 min., [Chiralcel<sup>®</sup>OD-H column, 24cm  $\times$  4.6 mm I.D., Hexanes:IPA = 90:10 1.5mL/min];  $^1\text{H}$  NMR (400 MHz,  $\text{CDCl}_3$ ):  $\delta$  7.68 (d,  $J = 8.4$  Hz, 2H), 7.49 (t,  $J = 7.6$  Hz, 1H), 7.42 (t,  $J = 8.0$  Hz, 2H), 7.27 (m, 3H), 7.20 (m, 2H), 5.87 (m, 2H), 5.13 (m, 2H), 4.30 (m, 1H), 2.73 (t,  $J = 8.0$  Hz, 2H), 2.39 (m, 2H), 1.95 (m, 1H), 1.87 (m, 1H);  $^{13}\text{C}$  NMR (75.0 MHz,  $\text{CDCl}_3$ ):  $\delta$  167.2, 141.9, 134.3, 131.6, 128.9, 128.8, 128.7, 128.5, 126.9, 126.2, 118.4, 49.2, 39.5, 36.4, 32.7; IR (thin film,  $\text{cm}^{-1}$ ): 3298, 3063, 2923, 1636, 1534, 1489, 1304; HRMS: calc'd for  $(\text{M}+\text{H})^+$   $\text{C}_{19}\text{H}_{21}\text{NO}$ : 280.1701; found: 280.1662.

### *N*-((*R*)-1-cyclohexylbut-3-enyl)benzamide (9m)

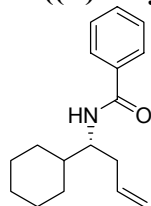

The crude mixture was purified by flash column chromatography with elution by 98:2 – 9:1, hexanes:EtOAc. **Yield:** 102 mg, 80%; **er:** 98:2;  $[\alpha]_{\text{D}}^{23} = +10.5^\circ$  ( $c = 0.8$ ,  $\text{CHCl}_3$ ); **mp:** 105–107  $^\circ\text{C}$ ; **HPLC Analysis**,  $t_{\text{r}}$  major: 6.2 min.,  $t_{\text{r}}$  minor: 8.0 min., [Chiralpak<sup>®</sup>AD-H column, 24cm  $\times$  4.6 mm I.D., Hexanes:IPA = 90:10 1.0mL/min];  $^1\text{H}$  NMR (400 MHz,  $\text{CDCl}_3$ ):  $\delta$  7.74 (d,  $J = 8.0$  Hz, 2H), 7.51 (d,  $J = 7.6$  Hz, 1H), 7.43 (d,  $J = 8.0$  Hz, 2H), 5.88 (d,  $J = 10.4$  Hz, 1H), 5.82 (m, 1H), 5.08 (m, 2H), 4.09 (m, 1H), 2.40 (m, 1H), 2.28 (m, 1H), 2.16 (m, 2H), 1.78 (m, 3H), 1.64 (d,  $J = 12$  Hz, 1H), 1.50 (m, 1H), 1.27–1.02 (m, 4H);  $^{13}\text{C}$  NMR (75.0 MHz,  $\text{CDCl}_3$ ):  $\delta$  167.3, 135.1, 131.4, 128.7, 127.0, 117.8, 53.5, 41.6, 36.6, 29.0, 28.3, 27.2, 26.4; IR (thin film,  $\text{cm}^{-1}$ ): 3301, 1917, 1852, 1637, 1532, 1487, 1444, 1283; HRMS: calc'd for  $(\text{M}+\text{H})^+$   $\text{C}_{17}\text{H}_{23}\text{NO}$ : 258.1813; found: 258.1868.

### *N*-((*R*)-2,2-dimethylhex-5-en-3-yl)benzamide (9n)

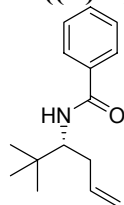

The crude mixture was purified by flash column chromatography with elution by 98:2 – 9:1, hexanes:EtOAc. **Yield:** 94 mg, 81%; **er:** 99.5:0.5;  $[\alpha]_{\text{D}}^{23} = -8.4^{\circ}$  ( $c = 1.4$ ,  $\text{CHCl}_3$ ); **mp:** 151–155 °C; **HPLC Analysis**,  $t_{\text{r}}$  minor: 5.24 min.,  $t_{\text{r}}$  major: 5.72 min., [Chiralpak<sup>®</sup>AD-H column, 24cm × 4.6 mm I.D., Hexanes:IPA = 90:10 1.0mL/min]; **<sup>1</sup>H NMR** (400 MHz,  $\text{CDCl}_3$ ):  $\delta$  7.73 (d,  $J = 8.8$  Hz, 2H), 7.48 (t,  $J = 7.2$  Hz, 1H), 7.43 (t,  $J = 7.2$  Hz, 2H), 5.80 (m, 2H), 5.05 (d,  $J = 17.2$  Hz, 1H), 5.01 (d,  $J = 10.4$  Hz, 1H), 4.11 (ddd,  $J = 10.4, 10.4, 3.2$  Hz, 1H), 2.55 (m, 1H), 2.05 (m, 1H), 0.99 (s, 9H); **<sup>13</sup>C NMR** (75.0 MHz,  $\text{CDCl}_3$ ):  $\delta$  166.7, 136.1, 131.5, 128.8, 126.9, 117.1, 57.1, 35.4, 35.1, 26.8; **IR** (thin film,  $\text{cm}^{-1}$ ): 3332, 3061, 2960, 1638, 1535, 1356, 1269, 1074, 992, 921, 728; **HRMS:** calc'd for  $(\text{M}+\text{H})^+$   $\text{C}_{15}\text{H}_{22}\text{NO}$ : 232.1701; found: 232.1682.

**(R)-N-(1-(benzyloxy)pent-4-en-2-yl)benzamide (9o)**

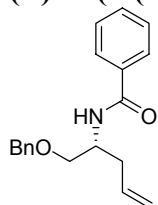

The crude mixture was purified by flash column chromatography with elution by 9:1 – 85:15, hexanes:EtOAc. **Yield:** 124 mg, 84%; **er:** 96.5:3.5;  $[\alpha]_{\text{D}}^{23} = +7.2^{\circ}$  ( $c = 1.0$ ,  $\text{CHCl}_3$ ); **HPLC Analysis**,  $t_{\text{r}}$  major: 16.7 min.,  $t_{\text{r}}$  minor: 18.2 min., [(R,R)-Whelk-O 1 (Regis<sup>®</sup> Technologies Inc., 25cm × 4.6mm I.D., Hexanes:IPA = 90:10 1.0mL/min)]; **<sup>1</sup>H NMR** (400 MHz,  $\text{CDCl}_3$ ):  $\delta$  7.73 (d,  $J = 8.8$  Hz, 2H), 7.48 (t,  $J = 7.2$  Hz, 1H), 7.73 (d,  $J = 8.4$  Hz, 2H), 7.49 (t,  $J = 8.4$  Hz, 1H), 7.41 (t,  $J = 8.4$  Hz, 2H), 7.34 (m, 5H), 6.40 (d,  $J = 8.0$  Hz, 1H), 5.83 (m, 1H), 5.12 (dd,  $J = 16, 1.2$  Hz, 1H), 5.08 (dd,  $J = 12, 1.2$  Hz, 1H), 4.52 (d,  $J = 4.0$  Hz, 2H), 4.35 (m, 1H), 3.64 (dd,  $J = 9.6, 3.6$  Hz, 1H), 3.57 (dd,  $J = 9.6, 3.6$  Hz, 1H), 2.48 (t,  $J = 7.6$  Hz, 2H); **<sup>13</sup>C NMR** (75.0 MHz,  $\text{CDCl}_3$ ):  $\delta$  167.1, 138.3, 135.0, 134.7, 131.6, 128.87, 128.6, 128.0, 127.9, 127.1, 118.1, 73.5, 70.9, 49.1, 36.5; **IR** (thin film,  $\text{cm}^{-1}$ ): 3342, 3065, 2917, 1737, 1641, 1536, 1487, 1453, 1246, 1112, 914; **HRMS:** calc'd for  $(\text{M}+\text{H})^+$   $\text{C}_{19}\text{H}_{22}\text{NO}_2$ : 296.1651; found: 296.1625.

**(S,Z)-N-(deca-1,7-dien-4-yl)benzamide (9p)**

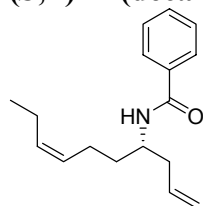

The crude mixture was purified by flash column chromatography with elution by 98:2 – 9:1, hexanes:EtOAc. **Yield:** 94 mg, 82%; **er:** 95.5:4.5;  $[\alpha]_{\text{D}}^{23} = +4.3^{\circ}$  ( $c = 1.0$ ,  $\text{CHCl}_3$ ); **HPLC Analysis**,  $t_{\text{r}}$  major: 7.3 min.,  $t_{\text{r}}$  minor: 9.3 min., [Chiralcel<sup>®</sup>OD column, 24cm × 4.6 mm I.D., Hexanes:IPA = 93:7 1.0mL/min]; **<sup>1</sup>H NMR** (400 MHz,  $\text{CDCl}_3$ ):  $\delta$  7.73 (d,  $J = 8.8$  Hz, 2H), 7.48 (t,  $J = 8.8$  Hz, 1H), 7.41 (t,  $J = 8.8$  Hz, 2H), 5.95 (d,  $J = 8.4$  Hz, 1H), 5.82 (m, 1H), 5.44 (m, 2H), 5.13 (d,  $J = 16.4$  Hz, 1H), 5.11 (d,  $J = 12$  Hz, 1H), 4.22 (m, 1H), 2.31 (m, 2H), 2.09 (m, 1H), 1.98 (m, 1H), 1.67 (m, 1H), 1.55 (m, 1H), 0.94 (t,  $J = 7.6$  Hz, 3H); **<sup>13</sup>C NMR** (75.0 MHz,  $\text{CDCl}_3$ ):  $\delta$  167.1, 134.5, 133.1, 131.5, 128.7, 128.4, 127.0, 118.2, 48.9, 39.3, 34.5, 29.3, 25.8, 14.0; **IR** (thin film,  $\text{cm}^{-1}$ ): 3306, 3065, 2961, 2931, 2243, 1733, 1635, 1579, 1490, 1448, 1311, 1265, 968, 911, 737, 703; **HRMS:** calc'd for  $(\text{M}+\text{H})^+$   $\text{C}_{17}\text{H}_{24}\text{NO}$ : 258.1858; found: 258.1861.

**4-(dimethylamino)-*N*-((*R*)-1-phenylbut-3-enyl)benzamide (11e)**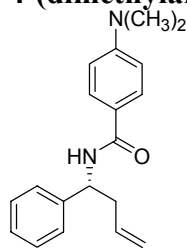

The reaction was run in 0.125 mmol scale and the crude mixture was purified by flash column chromatography with elution by 9:1 – 7:3, hexanes:EtOAc. **Yield:** 28 mg, 80%; **er:** 97:3;  $[\alpha]_D^{23} = -14.1^\circ$  ( $c = 1.4$ ,  $\text{CHCl}_3$ ); **mp:** 137-141  $^\circ\text{C}$ ; **HPLC Analysis**,  $t_r$  major: 15.4 min.,  $t_r$  minor: 17.6 min., [Chiralcel<sup>®</sup>OD column, 24cm  $\times$  4.6 mm I.D., Hexanes:IPA = 90:10, 1.5 mL/min]; **<sup>1</sup>H NMR** (400 MHz,  $\text{CDCl}_3$ ):  $\delta$  7.68 (d,  $J = 9.2$  Hz, 2H), 7.34 (m, 4H), 7.25 (m, 1H), 6.68 (d,  $J = 9.2$  Hz, 2H), 6.28 (d,  $J = 7.6$  Hz, 1H), 5.75 (m, 1H), 5.29 (dd,  $J = 16, 6.8$  Hz, 1H), 5.18 (d,  $J = 17.2$  Hz, 1H), 5.11 (d,  $J = 10$  Hz, 1H), 3.02 (s, 6H), 2.68 (t,  $J = 6.8$  Hz, 2H). **<sup>13</sup>C NMR** (75.0 MHz,  $\text{CDCl}_3$ ):  $\delta$  166.5, 152.4, 142.1, 134.2, 128.5, 128.3, 127.2, 126.4, 118.2, 111.1, 52.4, 40.7, 40.1; **IR** (thin film,  $\text{cm}^{-1}$ ): 3323, 2919, 1609, 1513, 1358, 1296, 1192, 760; **HRMS:** calc'd for  $(\text{M}+1)^+$   $\text{C}_{18}\text{H}_{20}\text{NO}_2$ : 282.1494; found: 282.1490.

**4-methoxy-*N*-((*R*)-1-phenylbut-3-enyl)benzamide (11f)**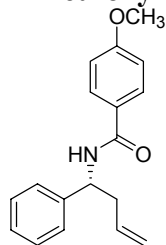

The reaction was run in 0.125 mmol scale and the crude mixture was purified by flash column chromatography with elution by 9:1 – 7:3, hexanes:EtOAc. **Yield:** 28 mg, 80%; **er:** 97.5:2.5;  $[\alpha]_D^{23} = +1.6^\circ$  ( $c = 0.5$ ,  $\text{CHCl}_3$ ); **mp:** 143-146  $^\circ\text{C}$ ; **HPLC Analysis**,  $t_r$  major: 9.3 min.,  $t_r$  minor: 13.7 min., [Chiralcel<sup>®</sup>OD column, 24cm  $\times$  4.6 mm I.D., Hexanes:IPA = 90:10, 1.5 mL/min]; **<sup>1</sup>H NMR** (400 MHz,  $\text{CDCl}_3$ ):  $\delta$  7.74 (d,  $J = 8.8$  Hz, 2H), 7.35 (d,  $J = 4.4$  Hz, 3H), 7.27 (m, 2H), 6.92 (d,  $J = 8.8$  Hz, 2H), 6.35 (d,  $J = 6.8$  Hz, 1H), 5.77 (m, 1H), 5.27 (dd,  $J = 14.4, 6.8$  Hz, 1H), 5.15 (m, 2H), 3.85 (s, 3H), 2.68 (t,  $J = 6.8$  Hz, 2H); **<sup>13</sup>C NMR** (75.0 MHz,  $\text{CDCl}_3$ ):  $\delta$  166.4, 159.9, 152.2, 134.5, 128.9, 127.6, 126.7, 118.6, 114.0, 55.6, 52.8, 40.8; **IR** (thin film,  $\text{cm}^{-1}$ ): 3302, 3068, 2926, 1639, 1535, 1484, 1299, 1006, 918, 841, 750, 695; **HRMS:** calc'd for  $(\text{M}+1)^+$   $\text{C}_{18}\text{H}_{19}\text{NO}_2$ : 282.1449; found: 282.1445.

**4-bromo-*N*-((*R*)-1-phenylbut-3-enyl)benzamide (11g)**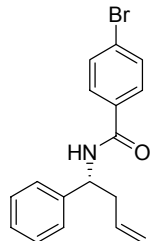

The reaction was run in 0.125 mmol scale and the crude mixture was purified by flash column chromatography with elution by 95:5 – 9:1, hexanes:EtOAc. **Yield:** 34 mg, 84%; **er:** 96.5:3.5;



$[\alpha]_D^{23} = -2.9^\circ$  ( $c = 0.8$ ,  $\text{CHCl}_3$ ); **mp**: 107-110 °C; **HPLC Analysis**,  $t_r$  major: 6.9 min.,  $t_r$  minor: 11.4 min., [Chiralcel<sup>®</sup>OD column, 24cm × 4.6 mm I.D., Hexanes:IPA = 90:10, 1.5 mL/min]; **<sup>1</sup>H NMR** (400 MHz,  $\text{CDCl}_3$ ):  $\delta$  7.63 (d,  $J = 8.8$  Hz, 2H), 7.56 (d,  $J = 8.8$  Hz, 2H), 7.34 (m, 4H), 7.28 (m, 1H), 6.37 (d,  $J = 6.8$  Hz, 1H), 5.76 (m, 1H), 5.26 (dd,  $J = 14.4, 6.8$  Hz, 1H), 5.18 (dd,  $J = 16.8, 1.6$  Hz, 1H), 5.13 (d,  $J = 9.6$  Hz, 1H), 2.69 (t,  $J = 6.8$  Hz, 2H); **<sup>13</sup>C NMR** (75.0 MHz,  $\text{CDCl}_3$ ):  $\delta$  167.1, 143.5, 137.2, 134.1, 132.1, 128.9, 128.7, 127.7, 126.6, 118.8, 53.1, 40.7; **IR** (thin film,  $\text{cm}^{-1}$ ): 3307, 3067, 2929, 1628, 1500, 1253, 1179, 1028, 844, 757; **HRMS**: calc'd for  $(\text{M}+\text{Na})^+$   $\text{C}_{17}\text{H}_{16}\text{BrNNaO}$ : 352.0912; found: 352.0925.

#### 4-fluoro-*N*-((*R*)-1-phenylbut-3-enyl)benzamide (11h)

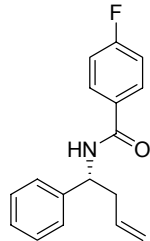

The reaction was run in 0.125 mmol scale and the crude mixture was purified by flash column chromatography with elution by 95:5 – 9:1, hexanes:EtOAc. **Yield**: 34 mg, 84%; **er**: 97.5:2.5;  $[\alpha]_D^{23} = +16.2^\circ$  ( $c = 0.7$ ,  $\text{CHCl}_3$ ); **mp**: 120-122 °C; **HPLC Analysis**,  $t_r$  major: 6.0 min.,  $t_r$  minor: 9.5 min., [Chiralcel<sup>®</sup>OD column, 24cm × 4.6 mm I.D., Hexanes:IPA = 90:10, 1.5 mL/min]; **<sup>1</sup>H NMR** (400 MHz,  $\text{CDCl}_3$ ):  $\delta$  7.77 (m, 2H), 7.33 (m, 4H), 7.28 (m, 1H), 7.09 (m, 2H), 6.41 (d,  $J = 6.8$  Hz, 1H), 5.76 (m, 1H), 5.26 (dd,  $J = 14.8, 6.8$  Hz, 1H), 5.18 (d,  $J = 16.2$  Hz, 1H), 5.13 (d,  $J = 10$  Hz, 1H), 2.69 (t,  $J = 6.8$  Hz, 2H); **<sup>13</sup>C NMR** (75.0 MHz,  $\text{CDCl}_3$ ):  $\delta$  166.6, 165.8, 141.7, 134.2, 129.4, 128.9, 127.7, 126.6, 118.7, 115.9, 115.7, 53.1, 40.8; **IR** (thin film,  $\text{cm}^{-1}$ ): 3336, 3072, 2923, 1631, 1540, 1499, 1286, 1232, 1157, 853, 752, 692; **HRMS**: calc'd for  $(\text{M}+1)^+$   $\text{C}_{17}\text{H}_{17}\text{FNO}$ : 270.1294; found: 270.1275.

#### 4-nitro-*N*-((*R*)-1-phenylbut-3-enyl)benzamide (11i)

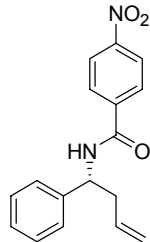

The reaction was run in 0.125 mmol scale and the crude mixture was purified by flash column chromatography with elution by 95:5 – 9:1, hexanes:EtOAc. **Yield**: 34 mg, 92%; **er**: 99.5:0.5;  $[\alpha]_D^{23} = -1.6^\circ$  ( $c = 1.1$ ,  $\text{CHCl}_3$ ); **mp**: 105-108 °C; **HPLC Analysis**,  $t_r$  major: 23.4 min.,  $t_r$  minor: 35.4 min., [Chiralcel<sup>®</sup>OD column, 24cm × 4.6 mm I.D., Hexanes:IPA = 90:10, 1.5 mL/min]; **<sup>1</sup>H NMR** (400 MHz,  $\text{CDCl}_3$ ):  $\delta$  8.28 (d,  $J = 8.8$  Hz, 2H), 7.91 (d,  $J = 8.8$  Hz, 2H), 7.36-7.30 (m, 5H), 6.43 (br, 1H), 5.78 (m, 1H), 5.30 (dd,  $J = 13.2, 6.8$  Hz, 1H), 5.22-5.14 (m, 2H), 2.72 (t,  $J = 6.8$  Hz, 2H); **<sup>13</sup>C NMR** (75.0 MHz,  $\text{CDCl}_3$ ):  $\delta$  164.6, 140.9, 140.1, 133.7, 128.8, 128.1, 127.7, 126.4, 123.9, 118.8, 53.1, 40.5; **IR** (thin film,  $\text{cm}^{-1}$ ): 3420, 3303, 3073, 2928, 1645, 1531, 1341, 856, 701; **HRMS**: calc'd for  $(\text{M})^+$   $\text{C}_{17}\text{H}_{16}\text{N}_2\text{O}_3\text{Na}$ : 319.1059; found: 319.1075.

**(R)-N-(1-phenylbut-3-enyl)cinnamamide (11k)**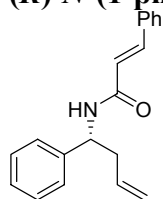

The crude mixture was purified by flash column chromatography with elution by 95:5 – 9:1, hexanes:EtOAc. **Yield:** 113 mg, 82%; **er:** 95:5;  $[\alpha]_D^{23} = -8.4^\circ$  ( $c = 1.4$ ,  $\text{CHCl}_3$ ); **mp:** 107-109 °C; **HPLC Analysis**,  $t_r$  major: 16.3 min.,  $t_r$  minor: 18.3 min., [Chiralpak<sup>®</sup>AD-H column, 24cm × 4.6 mm I.D., Hexanes:IPA = 90:10 1.5mL/min]; **<sup>1</sup>H NMR** (400 MHz,  $\text{CDCl}_3$ ):  $\delta$  7.63 (d,  $J = 16$  Hz, 1H), 7.47 (m, 2H), 7.32 (m, 7H), 7.26 (m, 1H), 6.42 (d,  $J = 16$  Hz, 1H), 6.01 (d,  $J = 7.6$  Hz, 1H), 5.73 (m, 1H), 5.23 (dd,  $J = 14.4, 7.2$  Hz, 1H), 5.14 (d,  $J = 16$  Hz, 1H), 5.09 (d,  $J = 10.4$  Hz, 1H), 2.65 (t,  $J = 7.8$  Hz, 2H); **<sup>13</sup>C NMR** (75.0 MHz,  $\text{CDCl}_3$ ):  $\delta$  167.2, 141.6, 135.0, 134.2, 129.9, 129.0, 128.9, 128.0, 127.6, 126.7, 120.8, 118.5, 52.9, 40.7; **IR** (thin film,  $\text{cm}^{-1}$ ): 3271, 3062, 1655, 1618, 1543, 1344, 1215, 989, 919, 738; **HRMS:** calc'd for  $(\text{M}+\text{H})^+$   $\text{C}_{19}\text{H}_{20}\text{NO}$ : 278.1545; found: 278.1526.

**(S)-N-(1-phenylbut-3-enyl)cyclohexanecarboxamide (11l) [(R)-7h was used as catalyst]**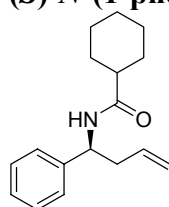

The crude mixture was purified by flash chromatography with elution by 95:5 – 9:1, hexanes:EtOAc. **Yield:** 238 mg, 83% **er:** 95:5;  $[\alpha]_D^{23} = -35.0^\circ$  ( $c = 0.5$ ,  $\text{CHCl}_3$ ); **mp:** 108-110 °C; **HPLC Analysis**,  $t_r$  major: 7.7 min.,  $t_r$  minor: 5.7 min., [Chiralcel<sup>®</sup>AD column, 24cm × 4.6 mm I.D., Hexanes:IPA = 90:10 1.5mL/min]; **<sup>1</sup>H NMR** (400 MHz,  $\text{CDCl}_3$ ):  $\delta$  7.33-7.21 (m, 5H), 5.88 (d,  $J = 8$  Hz, 1H), 5.67 (m, 1H), 5.07 (m, 3H), 2.43 (m, 2H), 2.06 (m, 1H), 1.80 (m, 4H), 1.42 (t,  $J = 12.4$  Hz, 2H), 1.26 (m, 4H); **<sup>13</sup>C NMR** (75.0 MHz,  $\text{CDCl}_3$ ):  $\delta$  175.5, 142.2, 134.4, 128.8, 127.4, 126.6, 118.3, 52.0, 45.8, 40.8, 30.0, 29.9, 25.9; **IR** (thin film,  $\text{cm}^{-1}$ ): 3269, 3066, 2928, 2852, 1640, 1549, 1459, 1448, 1336, 1271, 1220, 915, 701; **HRMS:** calc'd for  $(\text{M}+\text{H})^+$   $\text{C}_{17}\text{H}_{23}\text{NO}$ : 258.1858; found: 258.1862.

## Procedure for the Synthesis of Maraviroc<sup>10</sup>

### 4,4-Difluoro-cyclohexanecarboxylic acid benzylideneamide (13)

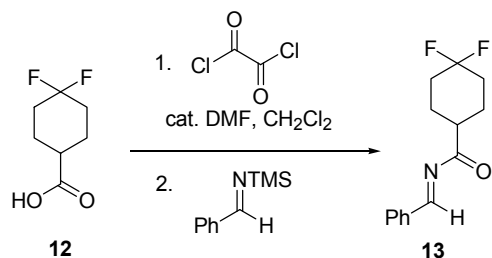

A 100 mL flame-dried round bottom flask under Ar was charged with a stir bar and 4,4-difluoro-cyclohexanecarboxylic acid (2.0 g, 12.2 mmol) **12**.<sup>11</sup> The flask was charged with dry  $\text{CH}_2\text{Cl}_2$  (12.2 mL) and 3 drops of dry DMF. Reaction was cooled to  $0^\circ\text{C}$  and under vigorous stirring oxalyl chloride (1.34 mL, 15.8 mmol) was carefully added. After evolution of gas was complete the reaction was warmed to room temperature and stirred an additional 30 min. Solvent and excess oxalyl chloride was removed *in vacuo* to give orange oil. The crude oil was distilled under reduced pressure to afford the acid chloride as a clear oil (1.9 g, 85% yield, bp 80-85, 10 Torr). In a new flame-dried flask under Ar charged with a stir bar and freshly distilled benzylidene-trimethylsilylamine<sup>12</sup> (1.94g, 10.9 mmol) was added dry  $\text{CH}_2\text{Cl}_2$  (10.9 mL) and cooled to  $0^\circ\text{C}$ . A solution of the acid chloride (1.99 g, 10.9 mmol, 2.0 M in  $\text{CH}_2\text{Cl}_2$ ) was slowly added via air-tight syringe. Upon completion of addition the reaction was refluxed at  $55^\circ\text{C}$  for 3 hours. The reaction was cooled to ambient temperature and the solvent was removed *in vacuo* to give the acyl imine **13** as yellow oil which slowly crystallized to a white solid over 48 hours. **Yield:** 2.08 g, 76% <sup>1</sup>H NMR (400 MHz,  $\text{CDCl}_3$ ):  $\delta$  8.42 (b, 1H), 7.84 (d,  $J = 7.2$  Hz, 2H), 7.53 (t,  $J = 5.2$  Hz, 1H), 7.46 (t,  $J = 7.2$  Hz, 2H), 2.65 (m, 1H), 2.18-2.06 (m, 4H), 1.94-1.72 (m, 4H) <sup>13</sup>C NMR (75.0 MHz,  $\text{CDCl}_3$ ):  $\delta$  174.7, 138.5, 133.4, 129.2, 129.1, 126.5, 126.2, 12.0, 43.9, 43.0, 32.9, 25.9, 25.1

### 4,4-Difluoro-cyclohexanecarboxylic acid (1-phenyl-but-3-enyl)-amide (14)

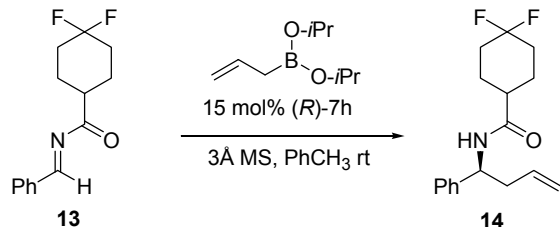

A 50 mL flame-dried round bottom flask was charged with stir bar and flushed with Ar. To the flask was added **14** (31 mg, 0.125 mmol), 3Å molecular sieves (120 mg), (*R*)-3,3'- $\text{Ph}_2$ -BINOL (8 mg, 0.02 mol) and toluene (3 mL). The mixture was stirred under Ar at room temperature and allyldiisopropoxyborane (1.0 M in toluene, 125  $\mu\text{L}$ , 0.125 mmol) was slowly added. The reaction

(10) Dorr, P.; Westby, M.; Dobbs, S.; Griffin, P.; Irvine, B.; Macartney, M.; Mori, J.; Rickett, G.; Smith-Burchnell, C.; Napier, C.; Webster, R.; Armour, D.; Price, D.; Stammen, B.; Wood, A.; Perros, M. *Antimicrob. Agents Chemother.* **2005**, *49*, 4721-4732.

(11) Price, D.; Gayton, S.; Selby, M. D.; Ahman, J.; Haycock-Lewandowski, S.; Stammen, B. L.; Warren, A. *Tetrahedron Lett.* **2005**, *46*, 5005-5007.

(12) See Method A.

mixture was stirred at room temperature for 24 hours and diluted with ether (2 mL) and water (2.0 mL). The biphasic mixture was stirred at room temperature for 10 minutes. The organic layer was separated and dried over Na<sub>2</sub>SO<sub>4</sub>. The organic layer was isolated by filtration and the filtrate was concentrated *in vacuo* at 20 °C. The residue was purified directly by flash chromatography over silica gel (elution with 95:5 – 8:2, hexanes:EtOAc) to afford the homoallylic amide **14** as a white solid. **Yield:** 27 mg, 75% **er:** 95.5:4.5 ;  $[\alpha]_D^{23} = +17.3^\circ$  ( $c = 0.4$ , CHCl<sub>3</sub>); **mp:** 109-110 °C; **HPLC Analysis**,  $t_r$  major: 12.5 min.,  $t_r$  minor: 6.8 min., [Chiralcel<sup>®</sup>OD column, 24cm × 4.6 mm I.D., Hexanes:IPA = 90:10, 1.5mL/min]; **<sup>1</sup>H NMR** (400 MHz, CDCl<sub>3</sub>): δ 7.24 (t,  $J = 1.6$  Hz, 2H), 7.26 (m, 3H), 5.72 (d,  $J = 7.6$  Hz, 1H), 5.59 (m, 1H), 5.01 (m, 3H), 2.47 (m, 1H), 2.09 (m, 3H), 1.88-1.60 (m, 6H). **<sup>13</sup>C NMR** (75.0 MHz, CDCl<sub>3</sub>): δ 173.4, 141.8, 134.2, 128.9, 127.7, 126.5, 125.3, 122.9, 120.5, 118.6, 52.3, 42.0, 40.8, 33.0, 26.2, 25.4. **IR** (thin film, cm<sup>-1</sup>): 3295, 3065, 2941, 1642, 1542, 1496, 1373, 1110, 963; **HRMS:** calc'd for (M+1)<sup>+</sup> C<sub>17</sub>H<sub>21</sub>F<sub>2</sub>NO: 316.1489; found 316.1488.

#### 4,4-Difluoro-cyclohexanecarboxylic acid (3-oxo-1-phenyl-propyl)-amide (**15**)<sup>13</sup>

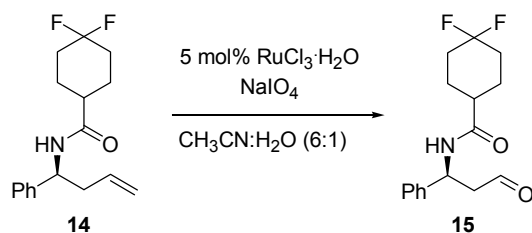

To an oven-dried round bottom flask was charged homoallylic amide **14** (50 mg, 0.170 mmol) under N<sub>2</sub> and dissolved in acetonitrile (3 mL). A solution of RuCl<sub>3</sub>·H<sub>2</sub>O (2 mg, 0.0085 mmol) in water (0.5 mL) was added at room temperature. Under vigorous stirring sodium periodate is added in one portion. Reaction was stirred for 3 hours and monitored by TLC. After consumption of starting material the reaction was quenched with a saturated aqueous solution of Na<sub>2</sub>S<sub>2</sub>O<sub>3</sub> (2 mL). The phases were separated and the aqueous layer was extracted with EtOAc (3 × 5 mL). The organic layers were combined and dried over Na<sub>2</sub>SO<sub>4</sub>. Silica gel flash chromatography (elution with 9:1 – 1:1, hexanes:EtOAc) afforded the aldehyde **15** as a white solid. **Yield:** 34 mg, 68%  $[\alpha]_D^{23} = -8.2^\circ$  ( $c = 1.0$ , CHCl<sub>3</sub>); **<sup>1</sup>H NMR** (400 MHz, CDCl<sub>3</sub>): δ 9.71 (s, 1H), 7.36 (m, 2H), 7.27 (m, 3H), 6.17 (d,  $J = 8$  Hz, 1H), 5.50 (q,  $J = 6.9$  Hz, 1H), 2.95 (qd, 1H), 2.09 (m, 3H), 1.89-1.61 (m, 6H). **<sup>13</sup>C NMR** (75.0 MHz, CDCl<sub>3</sub>): δ 173.6, 148.1, 140.5, 133.2, 129.3, 128.3, 126.6, 122.8, 55.8, 49.1, 48.6, 33.3, 33.0, 32.7, 26.0. **IR** (thin film, cm<sup>-1</sup>): 3302, 3087, 2941, 1723, 1647, 1589, 1496, 1373, 1263, 1109, 963, 848; **HRMS:** calc'd for (M+1)<sup>+</sup> C<sub>16</sub>H<sub>19</sub>F<sub>2</sub>NO<sub>2</sub>: 296.1; found: 296.2

(13) Yang, D.; Zhang, C. *J. Org. Chem.* **2001**, *66*, 4814-4818.

**Maravircoc. 4,4-Difluoro-cyclohexanecarboxylic acid {3-[3-(3-isopropyl-5-methyl-[1,2,4]triazol-4-yl)-8-aza-bicyclo[3.2.1]oct-8-yl]-1-phenyl-propyl}-amide (17)**

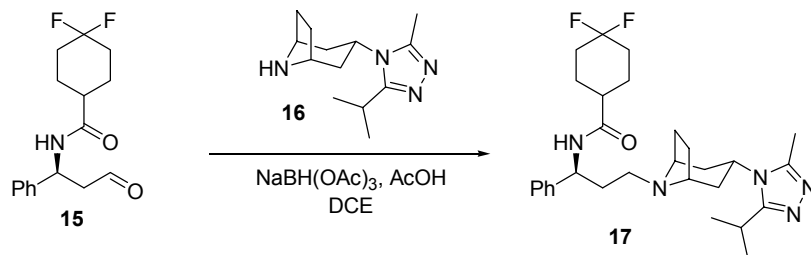

To a flame-dried reaction vial equipped with stir under Ar was added aldehyde **15** (9 mg, 0.03 mmol), tropane **16**<sup>1,14</sup> (8 mg, 0.03 mmol) and dry 1,2-dichloroethane (0.5 mL). Acetic acid (2  $\mu$ L, 0.03 mmol) was added via syringe and the solution stirred for 15 min at room temperature. In one portion, sodium triacetoxyborohydride (12 mg, 0.05 mmol) was added followed by the evolution of H<sub>2</sub> gas. The reaction was stirred for 12 hrs and monitored by TLC until consumption of the aldehyde was complete. The reaction was quenched with saturated aqueous NaHCO<sub>3</sub> and extracted with CH<sub>2</sub>Cl<sub>2</sub> (2  $\times$  5 mL) and the combined organic layers were purified by flash chromatography over silica gel (elution with 9:1 CH<sub>2</sub>Cl<sub>2</sub>:MeOH). The product **17** was obtained as a sticky white solid. **Yield:** 15 mg, 88% [ $\alpha$ ]<sub>D</sub><sup>23</sup> = -16.8° (c = 0.4, CHCl<sub>3</sub>); <sup>1</sup>H NMR (400 MHz, CDCl<sub>3</sub>):  $\delta$  7.36 (m, 2H), 7.23 (m, 3H), 6.55 (b, 1H), 5.15 (d, *J* = 6.6 Hz, 1H), 4.27 (m, 1H), 3.33 (m, 1H), 2.85 (m, 1H), 2.48 (s, 3H), 2.28 (m, 2H), 2.20-1.64 (m, 19H), 1.39 (d, *J* = 6.8 Hz, 6H); <sup>13</sup>C NMR (75.0 MHz, CDCl<sub>3</sub>):  $\delta$  172.4, 158.0, 149.6, 140.8, 127.8, 127.5, 126.5, 125.4, 123.9, 121.6, 119.2, 57.9, 57.0, 46.7, 46.0, 41.8, 34.0, 31.7, 31.5, 30.6, 28.7, 25.7, 24.8, 24.3, 21.6, 20.6, 13.1, 12.1 **IR** (thin film, cm<sup>-1</sup>): 3288, 3030, 2960, 1736, 1664, 1534, 1451, 1372, 1260, 1108, 1031, 964; **HRMS**: calc'd for (M+1)<sup>+</sup> C<sub>29</sub>H<sub>41</sub>F<sub>2</sub>N<sub>5</sub>O: 514.3357; found: 514.3409.

**General Procedure for Asymmetric Crotylation of Acyl imines.**

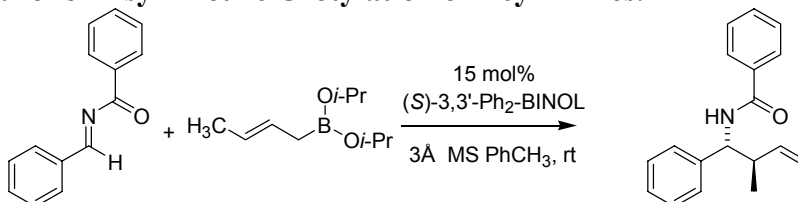

To a 15  $\times$  100 mm oven-dried glass vessel equipped with stir bar was added (*E*)-*N*-benzylidenebenzamide (26.2 mg, 0.125 mmol), 3Å molecular sieves (125 mg), (*S*)-3,3'-Ph<sub>2</sub>-BINOL (8.3 mg, 0.019 mmol) and dissolved in toluene (1.125 mL) under Ar. The mixture was stirred for 5 minutes at room temperature, charged with (*E*)-crotyldiisopropoxyborane (1.0 M in toluene, 125  $\mu$ L, 0.125 mmol) and stirred for 24 hours. The mixture was diluted with Et<sub>2</sub>O (1 mL) and water (1.5 mL) and stirred for 10 minutes at room temperature. The organic layer was separated and dried over Na<sub>2</sub>SO<sub>4</sub>. The organic layer was separated by filtration and the filtrate was concentrated *in vacuo* at 20 °C. The residue was purified by flash chromatography

- (14) (a) Armour, D. R.; de Groot, M. J.; Price, D. A.; Stammen, B. L. C.; Wood, A.; Perros, M. Burt, C; *Chem. Biol. Drug. Des.* **2006**, *67*, 305–308. (b) Lewin, A. H.; Sun, G.; Fudala, L.; Navarro, H.; Zhou, L.-M.; Popik, P.; Faynsteyn, A.; Skolnick, P. *J. Med. Chem.* **1998**, *41*, 988-995. (c) Price, D. A.; Gayton, S.; Selby, M. D.; Ahman, J. Haycock-Lewandowski, S. *Synlett*, **2005**, *7*, 1133-1134.

over silica gel (elution with 98:5 – 9:1, hexanes:EtOAc) to afford the homoallylic amide as a white solid.

### *N*-((1*R*,2*R*)-2-methyl-1-phenylbut-3-enyl)benzamide **19**

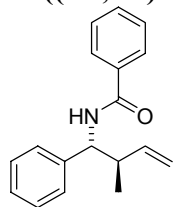

The reaction was run with (*E*)-crotyldiisopropoxyborane on 0.125 mmol scale and crude mixture was purified by flash column chromatography over silica gel (elution with 98:5 – 9:1, hexanes:EtOAc) to afford the homoallylic amide. **IR** (thin film,  $\text{cm}^{-1}$ ): **Yield:** 28 mg, 85%; **er:** 98.5:1.5;  $[\alpha]_{\text{D}}^{23} = +13.3^{\circ}$  ( $c = 1.0$ ,  $\text{CHCl}_3$ ); **mp:** 120-121  $^{\circ}\text{C}$ ; **HPLC Analysis**,  $t_{\text{r}}$  minor: 12.64 min.,  $t_{\text{r}}$  major: 15.33 min., [Chiralcel<sup>®</sup>OD column, 24cm  $\times$  4.6 mm I.D., Hexanes:IPA = 95:5, 1.0 mL/min]; **<sup>1</sup>H NMR** (400 MHz,  $\text{CDCl}_3$ ):  $\delta$  7.75 (d,  $J = 7.5$  Hz, 2H), 7.50 (t,  $J = 6.5$  Hz, 1H), 7.44 (d,  $J = 7.5$  Hz, 2H), 7.33 (m, 5H), 6.45 (d,  $J = 8.0$  Hz, 1H), 5.83 (m, 1H), 5.18 (m, 2H), 5.03 (t,  $J = 7.5$  Hz, 1H), 2.75 (m, 1H), 1.05 (d,  $J = 6.5$  Hz, 3H) **<sup>13</sup>C NMR** (75.0 MHz,  $\text{CDCl}_3$ ):  $\delta$  166.9, 141.5, 140.1, 134.9, 131.7, 129.0, 128.7, 127.5, 127.0, 116.6, 57.8, 43.8, 17.4 **IR** (thin film,  $\text{cm}^{-1}$ ): 3272, 3003, 2857, 1636, 1557, 1509, 1488, 1373, 1239, 1111, 1019 **HRMS**: calc'd for  $(\text{M}+1)^+$   $\text{C}_{18}\text{H}_{20}\text{NO}$  266.1427; found 266.1448.

### *N*-((1*R*,2*R*)-2-Methyl-1-phenyl-but-3-enyl)-benzamide **19**

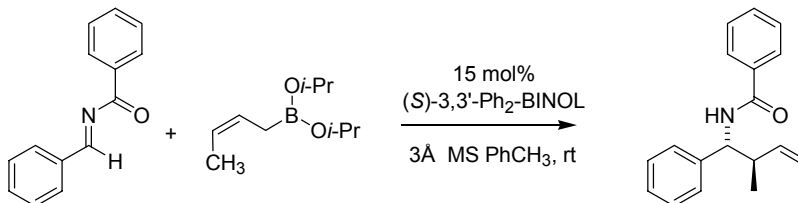

The reaction was run with (*Z*)-crotyldiisopropoxyborane on 0.125 mmol scale and crude mixture was purified by flash column chromatography over silica gel (elution with 98:2 – 9:1, hexanes:EtOAc) to afford the homoallylic amide. **Yield:** 21 mg, 64%; **er:** 94:6;  $[\alpha]_{\text{D}}^{23} = +9.6^{\circ}$  ( $c = 1.0$ ,  $\text{CHCl}_3$ ); **HPLC Analysis**,  $t_{\text{r}}$  minor: 21.5 min.,  $t_{\text{r}}$  major: 29.1 min., [Chiralcel<sup>®</sup>OD column, 24cm  $\times$  4.6 mm I.D., Hexanes:IPA = 98:2, 1.5 mL/min]; **<sup>1</sup>H NMR** (400 MHz,  $\text{CDCl}_3$ ):  $\delta$  7.75 (d,  $J = 7.5$  Hz, 2H), 7.50 (t,  $J = 6.5$  Hz, 1H), 7.44 (d,  $J = 7.5$  Hz, 2H), 7.33 (m, 5H), 6.45 (d,  $J = 8$  Hz, 1H), 5.83 (m, 1H), 5.18 (m, 2H), 5.03 (t,  $J = 7.5$  Hz, 1H), 2.75 (m, 1H), 1.05 (d,  $J = 6.5$  Hz, 3H) **<sup>13</sup>C NMR** (75.0 MHz,  $\text{CDCl}_3$ ):  $\delta$  166.9, 141.5, 140.1, 134.9, 131.7, 129.0, 128.7, 127.5, 127.0, 116.6, 57.8, 43.8, 17.4 **IR** (thin film,  $\text{cm}^{-1}$ ): 3272, 3003, 2857, 1636, 1557, 1509, 1488, 1373, 1239, 1111, 1019.

**Procedure for preparation of racemic crotylation products.**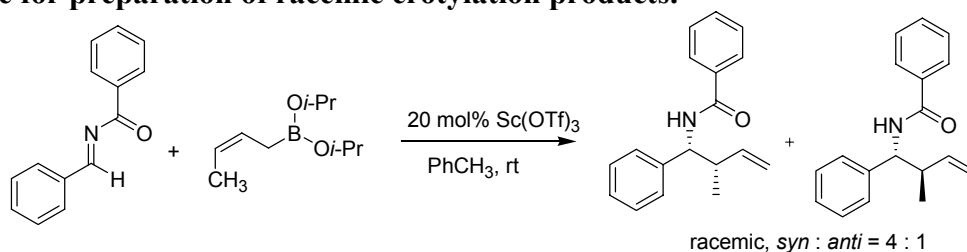

A 15 × 100 mm oven dried glass vessel was charged with stir bar and flushed with Ar. (*E*)-*N*-benzylidenebenzamide (26.2 mg, 0.125 mmol) was added and dissolved in toluene (1.125 mL). Scandium triflate (12.3 mg, 0.025 mmol) and (*Z*)-crotyldiisopropoxyborane (125 μL, 0.125 mmol, 1.0 M in toluene) were added subsequently into the reaction mixture and stirred for 24 hours. The mixture was diluted with ether (1 mL) and water (1.5 mL) and stirred for 10 minutes at room temperature. The organic layer was separated and dried over Na<sub>2</sub>SO<sub>4</sub>. The organic layer was separated by filtration, and the filtrate was concentrated *in vacuo* and the residue was purified by flash chromatography over silica gel (elution with 98:2 – 9:1, hexanes:EtOAc) to afford the homoallylic amide as a white solid.

**Diastereoselectivity and absolute stereochemistry determination.**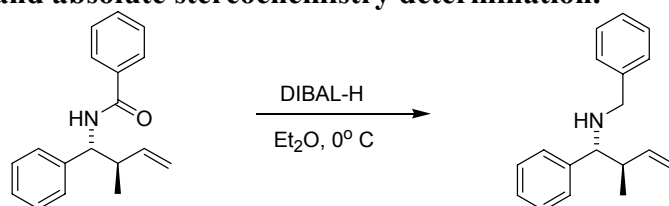

A 15 × 100 mm oven dried glass vessel was charged with stir bar and flushed with Ar. *N*-(2-methyl-1-phenyl-but-3-enyl)-benzamide **19** (33.1 mg, 0.125 mmol) was added and dissolved in Et<sub>2</sub>O (1.0 mL) and cooled to 0 °C. Diisobutylaluminum hydride (0.375 mL, 0.375 mmol 1.0 M in hexanes) was slowly added via syringe. Reaction was warmed to room temperature and stirred for 2 hours. Reaction was quenched with saturated sodium bicarbonate and the organic layer extracted. Concentration under reduced pressure afforded the product in 94% yield. <sup>1</sup>H NMR spectra was in agreement with the *anti* product previously described literature<sup>15</sup>.

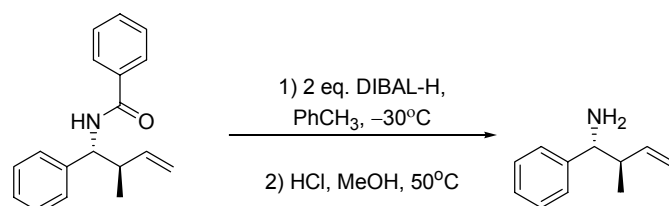

A 15 × 100 mm oven-dried glass vessel was charged with stir bar and flushed with Ar. *N*-(2-methyl-1-phenyl-but-3-enyl)-benzamide **19** (33.1 mg, 0.125 mmol) was added and dissolved in toluene (1 mL) and cooled to –35 °C. Diisobutylaluminum hydride (2.5 mL, 0.25 mmol, 0.1 M in toluene) was slowly added in 5 hour via syringe pump and stirred overnight. The reaction was quenched with MeOH (15 μL) and warmed to room temperature. To the reaction mixture was added NaF (30 mg), KOH (15 mg) and water (15 μL) and stirred vigorously for 1 hour. The solution was diluted with chloroform (5 mL) and filtered through a celite bed. The filtrate was

(15) Fujita, K.; Yorimitsu, H.; Shinokubo, H., Oshima, K. *J. Org. Chem.* **2004**, *69*, 3302

dried over anhydrous  $\text{Na}_2\text{SO}_4$  and concentrated under reduced pressure. The residue was dissolved in MeOH (1.0 mL) and concentrated HCl (0.3 mL) was added. The reaction mixture was stirred at  $50^\circ\text{C}$  overnight. The mixture was diluted with chloroform (3.0 mL) and water (3.0 mL) and pH was adjusted to 12 with solid KOH. The organic layer was separated and aqueous layer was extracted with chloroform (5 mL). The combined organic layers was dried over  $\text{Na}_2\text{SO}_4$  and concentrated under reduced pressure. The residue was purified by flash chromatography over silica gel (elution with 98:2 – 9:1,  $\text{CH}_2\text{Cl}_2$ :MeOH) to afford the desired (1*R*,2*R*)-2-methyl-1-phenylbut-3-en-1-amine as clear oil in 81% yield. The spectroscopic data was in agreement with previously reported data.<sup>10,15</sup>  $[\alpha]_{\text{D}}^{23} = -86^\circ$  ( $c = 0.4$ ,  $\text{CHCl}_3$ ). Lit.<sup>16</sup>  $[\alpha]_{\text{D}}^{22} = +76^\circ$  ( $c = 0.92$ ,  $\text{CHCl}_3$ , (1*S*,2*S*)-isomer).

---

(16) Ramachandran, P. V.; Burghardt, T. E.; Bland-Berry, L. *J. Org. Chem.* **2005**, *70*, 7911.



### Kinetic Experiment

**General experimental to determine catalyst order.** A 5 mL vial equipped with stir bar was fitted with a rubber septum to the DiComp ReactIR 4000 Probe. The vial was charged toluene (2.0 mL) and the background spectrum was recorded. (*E*)-*N*-benzylidenebenzamide **5** (55mg, 0.25 mmol) was charged into the flask and stirred for 5 minutes. 3,3'-Ph<sub>2</sub>-BINOL **7h** (16.5 mg, 0.038 mmol, 15 mol% catalyst loading) was charged and stirred for 1 minute followed by addition of pure diisopropylallylborane (50  $\mu$ L, 0.25 mmol). The reaction mixture was stirred at room temperature for 150 minutes and the product peak at 1482.23 cm<sup>-1</sup> was monitored by ReactIR at real time.

**Table.** Molarity and  $k_{\text{obs}}$

| Molarity (M) | $k_{\text{obs}}$<br>(mM/min) |
|--------------|------------------------------|
| 0.02         | 0.0004                       |
| 0.05         | 0.0006                       |
| 0.10         | 0.0009                       |
| 0.15         | 0.0010                       |
| 0.20         | 0.0013                       |
| 0.25         | 0.0014                       |

**Figure.** First-order catalyst in allylboration of imine

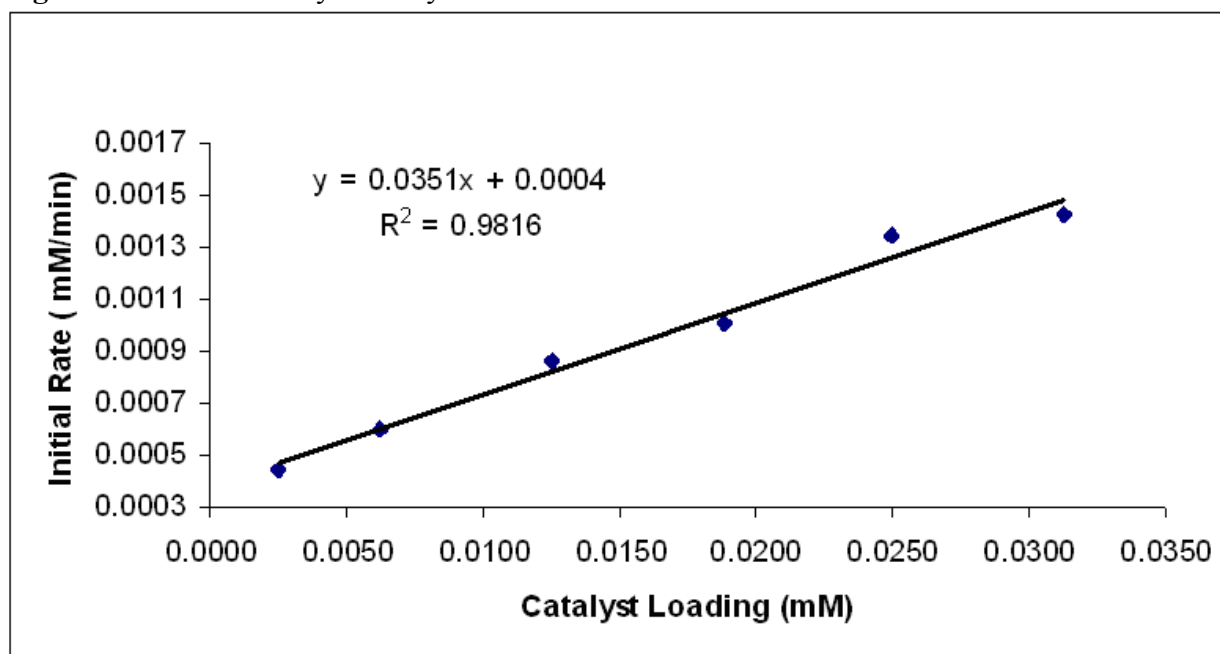

**NMR Samples:**

To an NMR tube purged with Ar was added a pure sample of allyldiisopropoxyborane **4** and CD<sub>3</sub>C<sub>6</sub>D<sub>5</sub> (1.0 mL). The <sup>1</sup>H-NMR spectra was taken at room temperature. Three singlet peaks (7.10 ppm, 7.02 ppm, 6.98 ppm, 2.09 ppm) were reference peaks of CD<sub>3</sub>C<sub>6</sub>D<sub>5</sub>. The impurity in allyldiisopropoxyborane was allylboronic acid due to hydrolysis.

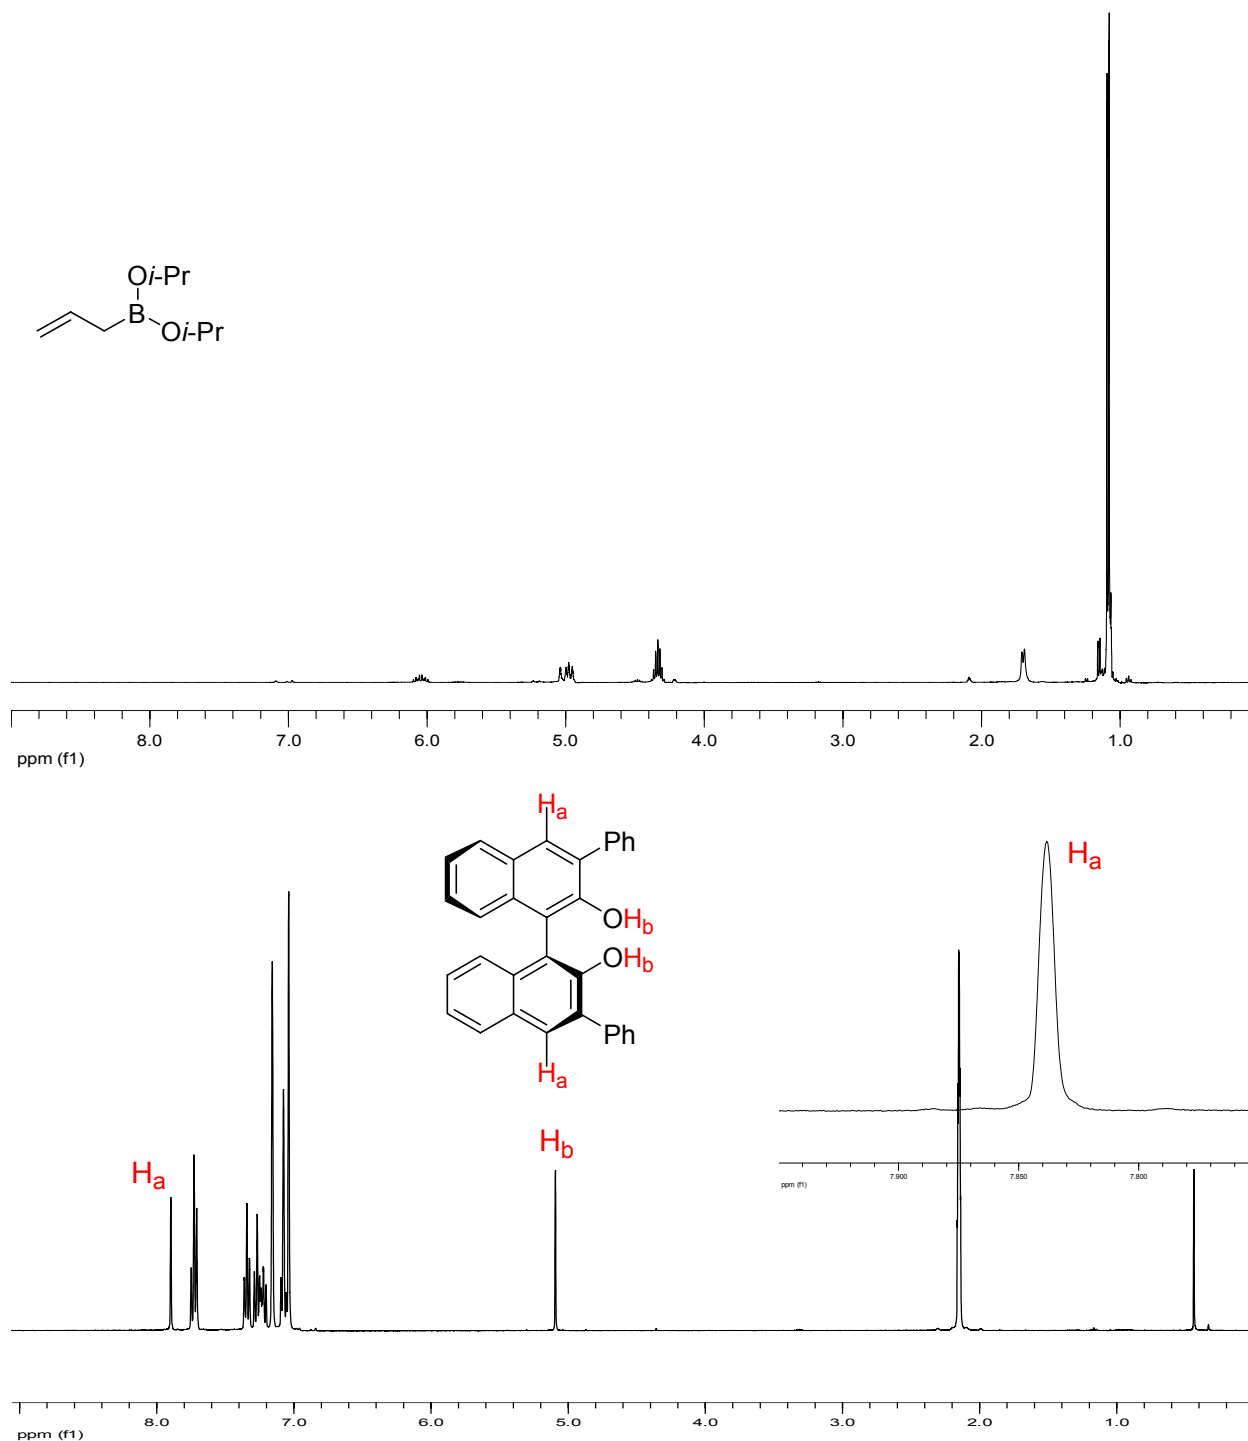

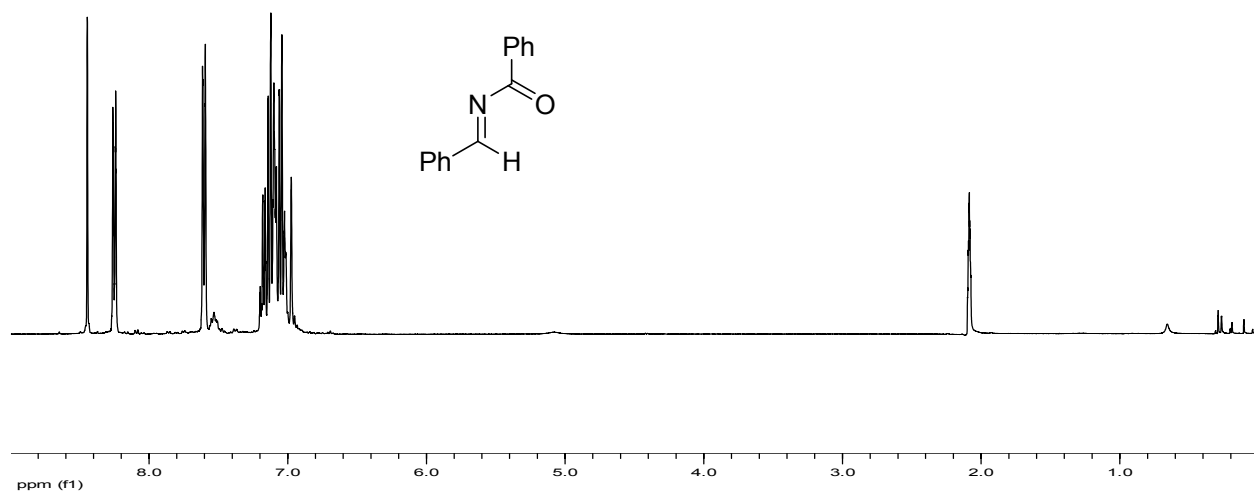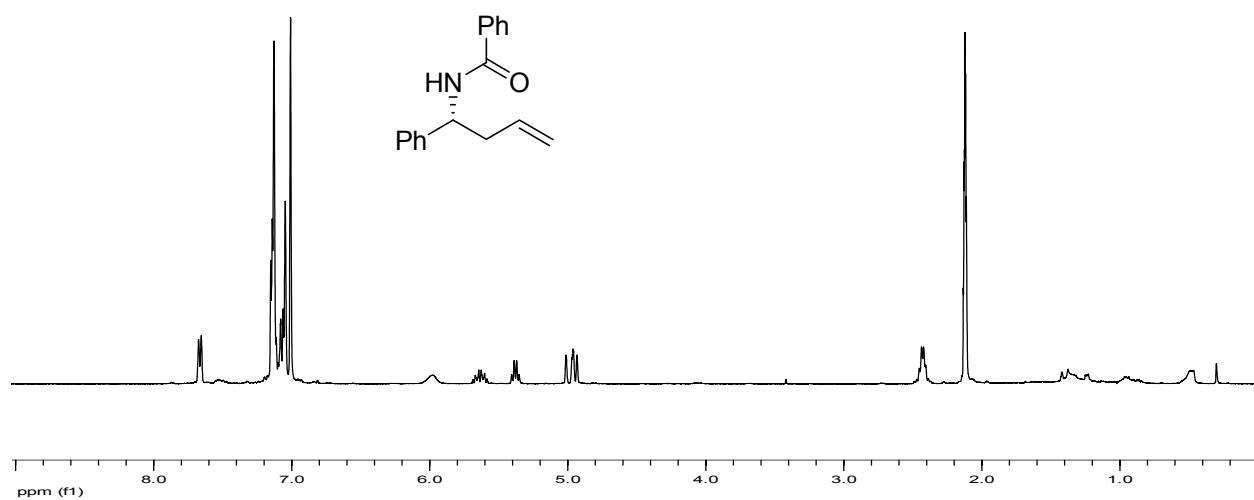

**<sup>1</sup>H-NMR of mixing (*S*)-3,3'-Ph<sub>2</sub>-BINOL **7h** and allyldiisopropoxyborane **4**:**

To an NMR tube was added allyldiisopropoxyborane **4** (40  $\mu$ L, 0.10 mmol) and CD<sub>3</sub>C<sub>6</sub>D<sub>5</sub> under Ar. (*S*)-3,3'-Ph<sub>2</sub>-BINOL **7h** (6.8 mg, 0.015 mmol) was added subsequently. The solution was left under Ar at room temperature for 20 hours. <sup>1</sup>H-NMR spectra was taken at room temperature. Peak at 7.84 ppm was assigned as H<sub>a</sub>. Peaks H<sub>b</sub> and H<sub>c</sub> were assigned based on previously reported boronates.<sup>17</sup>

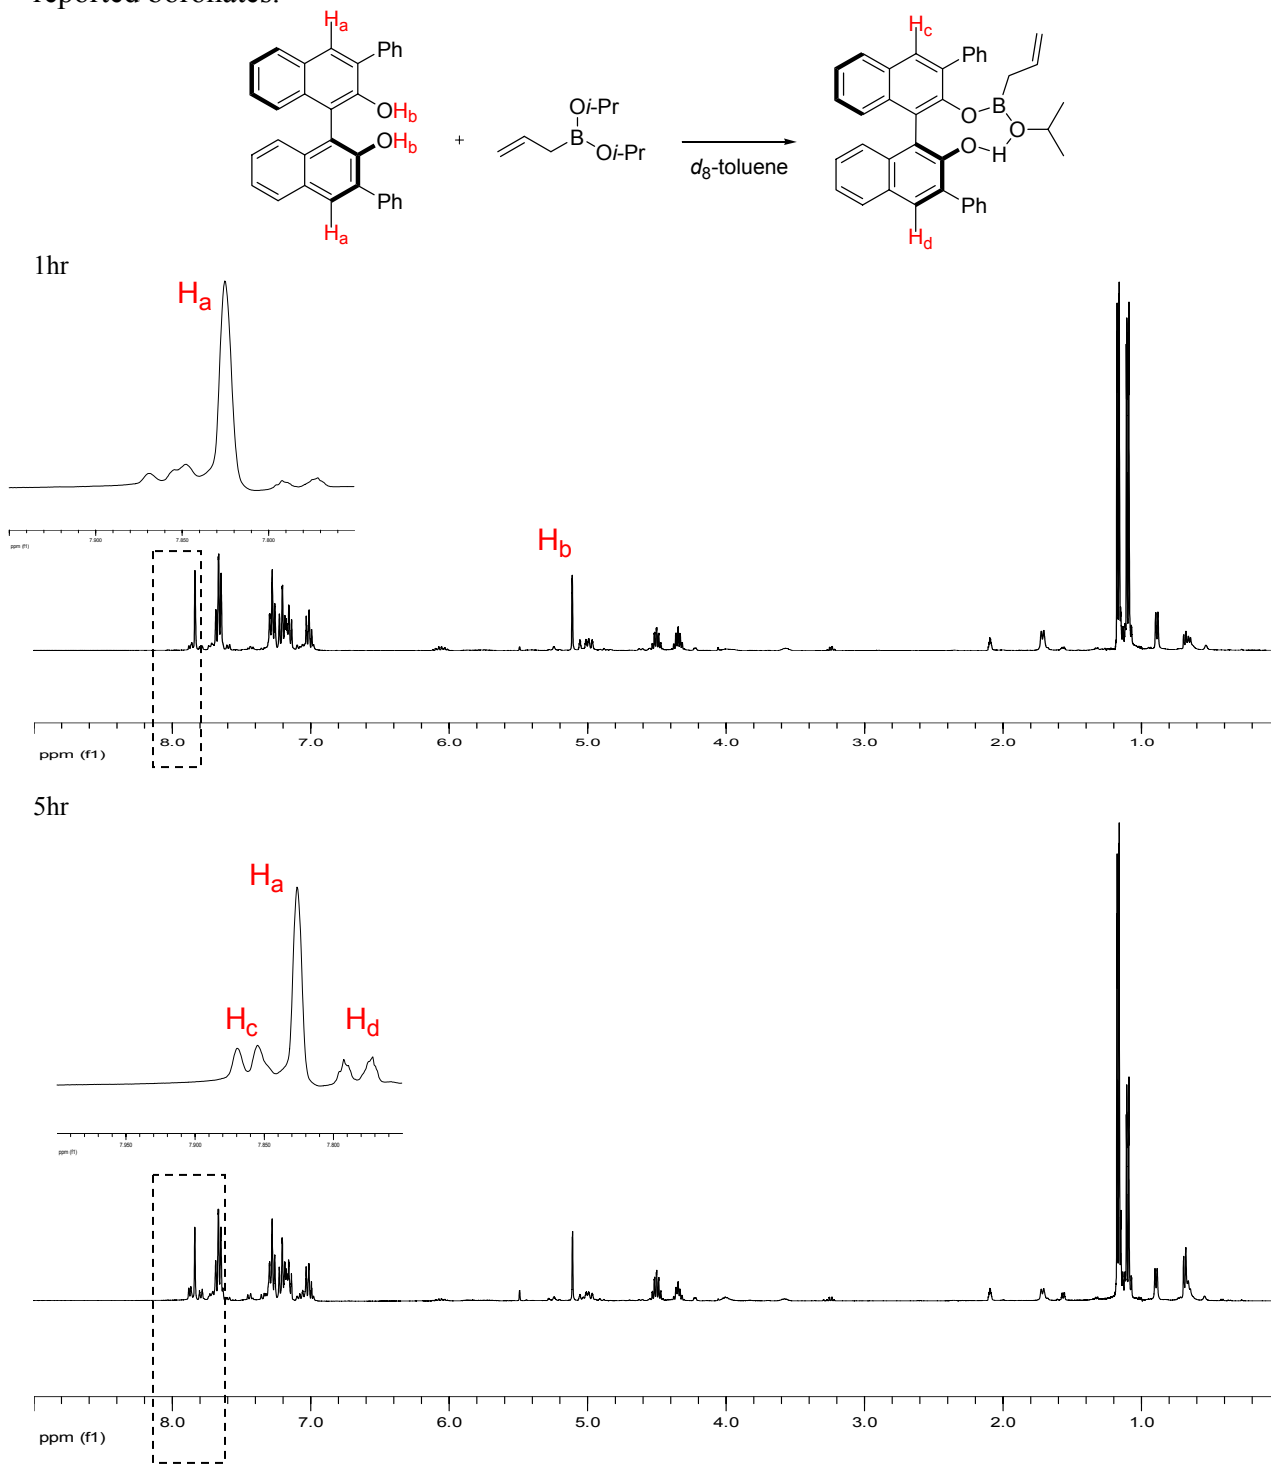

(17) Thormeier, S.; Carboni, B.; Kaufmann, D. E. *Journal of Organometallic Chemistry* **2002**, 657, 136.

**<sup>1</sup>H-NMR experiment to monitor the reaction using stoichiometric amount of (S)-3,3'-Ph<sub>2</sub>-BINOL 7h:**

In a dry vial was added acyl imine **5** (20 mg, 0.10 mmol) and (S)-3,3'-Ph<sub>2</sub>-BINOL **7h** (44mg, 0.10 mmol) and dissolved in CD<sub>3</sub>C<sub>6</sub>D<sub>5</sub> (5.0 mL) under Ar. The solution was charged with allyldiisopropoxyborane **4** (75 uL, 0.30 mmol) and transferred to a dry NMR tube. The reaction was monitored by <sup>1</sup>H-NMR at room temperature. The acyl imine and allyldiisopropoxyborane were completely consumed after 15 min. In the resulting mixture, 65% of the product was assigned to the (S)-3,3'-Ph<sub>2</sub>-BINOL associated complex. This solution was quenched with water followed by the general workup procedure. The crude mixture was subjected flash chromatography over silica gel afford the homoallylic amide product in 99:1 er.

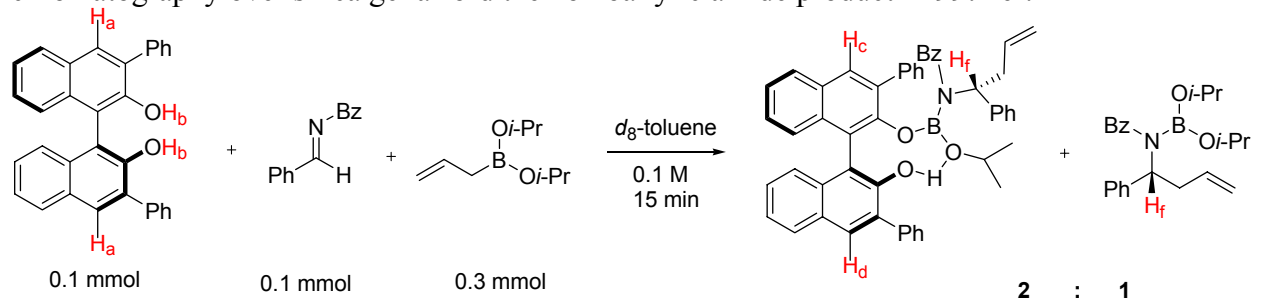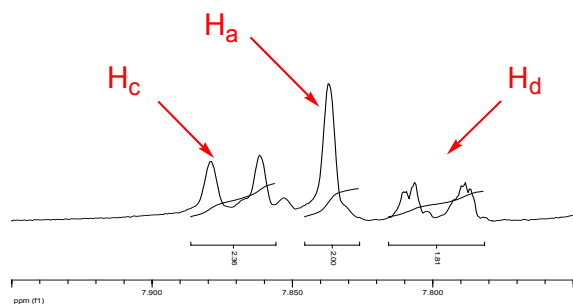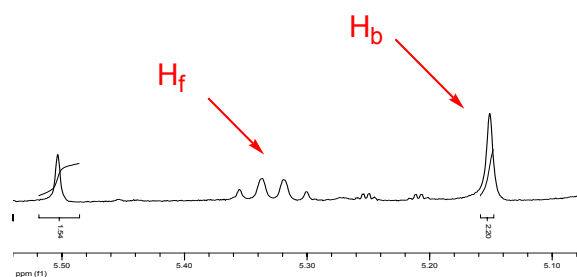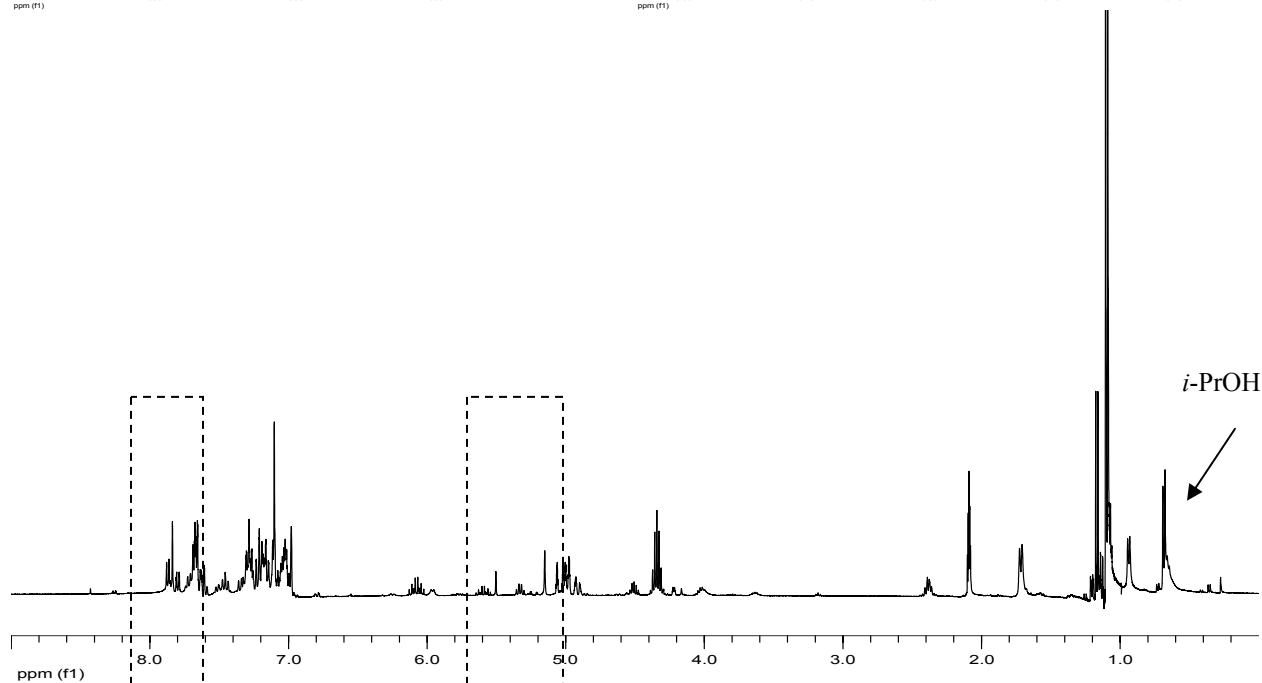

In a dry vial was added acyl imine **5** (40 mg, 0.20 mmol) and (*S*)-3,3'-Ph<sub>2</sub>-BINOL **7h** (44mg, 0.10 mmol) and dissolved in CD<sub>3</sub>C<sub>6</sub>D<sub>5</sub> (5.0 mL) under Ar. The solution was charged with allyldiisopropoxyborane **4** (75 uL, 0.30 mmol) and transferred to a dry NMR tube. The reaction was monitored by <sup>1</sup>H-NMR at room temperature. The acyl imine and allyldiisopropoxyborane were completely consumed after 30 min. In the resulting mixture, 50% of the product was assigned to the (*S*)-3,3'-Ph<sub>2</sub>-BINOL associated complex. This solution was quenched with water followed by general workup procedure. The crude mixture was subject to silica gel column to afford the homoallylic amide product in 99:1 er.

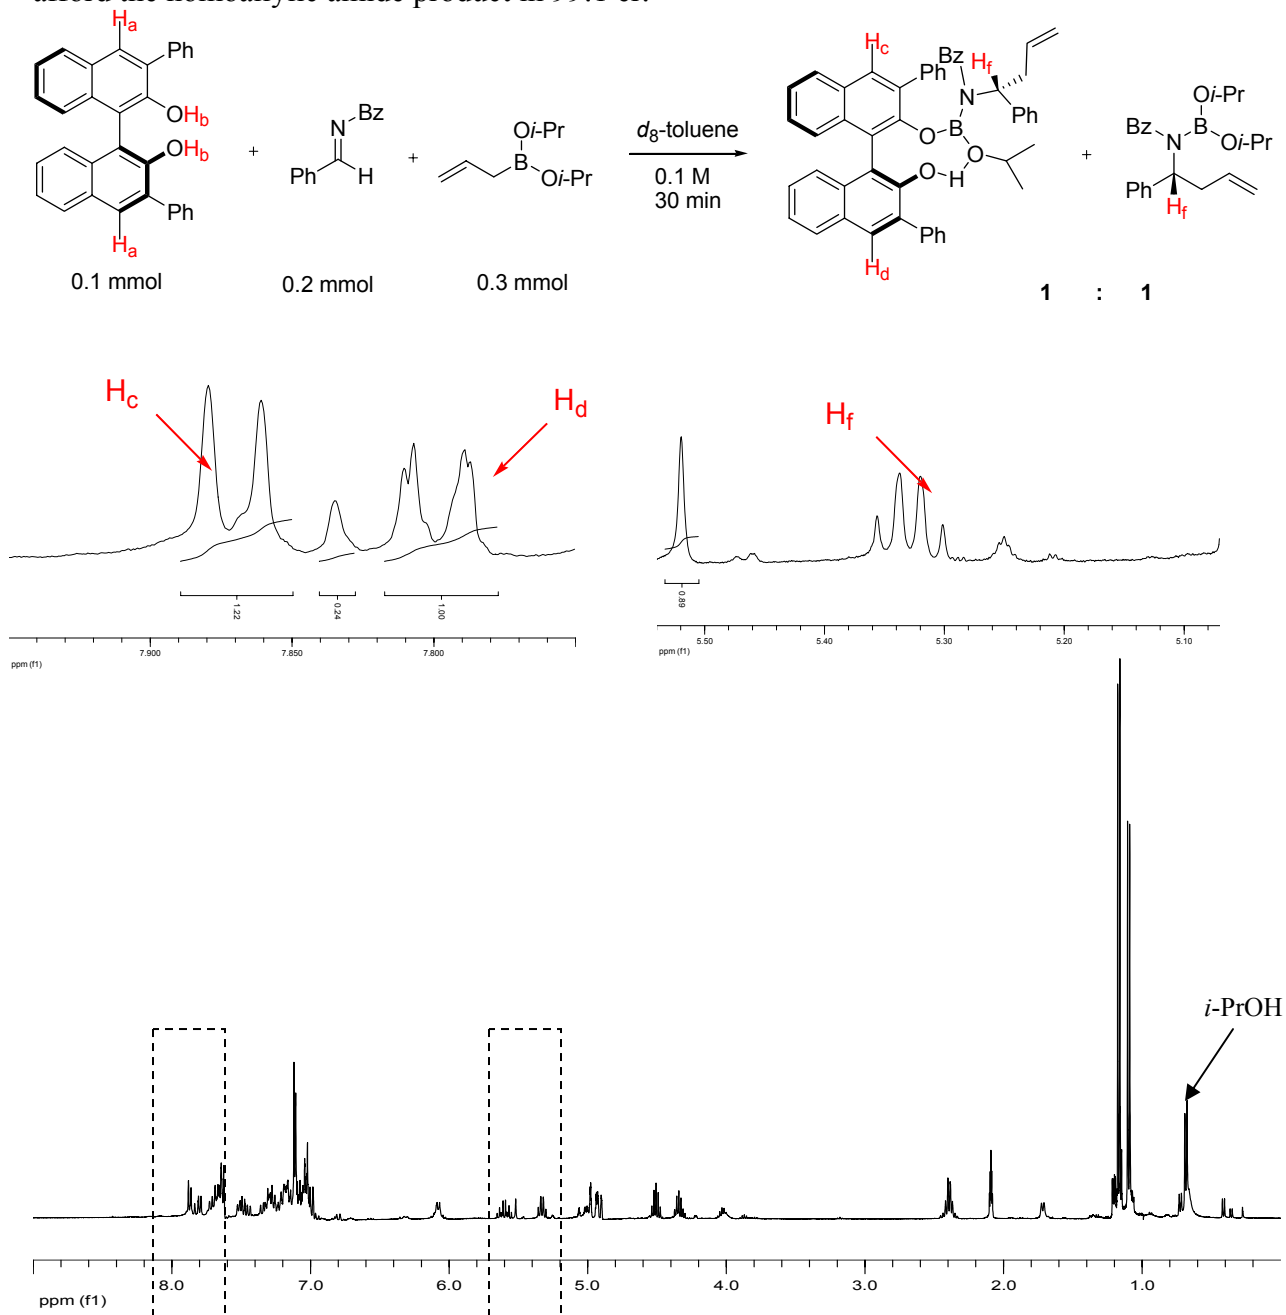

**Standard  $^1\text{H-NMR}$  experiment to monitor the reaction under catalytic condition:**

In a dry vial the acyl imine **5** (31mg, 0.15 mmol) and (*S*)-3,3'-Ph<sub>2</sub>-BINOL **7h** (10mg, 0.022 mmol) was dissolved in CD<sub>3</sub>C<sub>6</sub>D<sub>5</sub> (1.0 mL) under Ar. The solution was transferred to a dry NMR tube under Ar and charged with allyldiisopropoxyborane **4** (40 uL, 0.15 mmol). Solution was monitored by  $^1\text{H-NMR}$  at room temperature for 20 h until all starting materials were consumed. This solution was quenched with water followed by general workup procedure. The crude mixture was subject to silica gel column to afford the homoallylic amide product in 99:1 er.

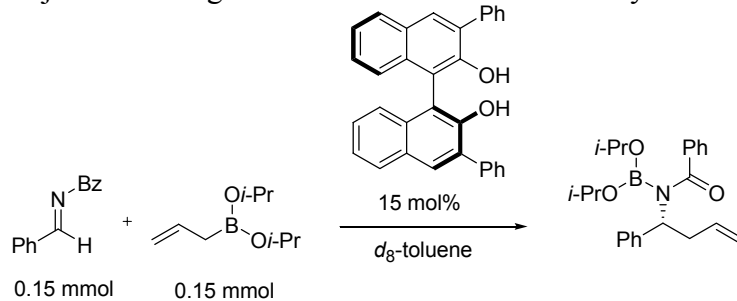

1 min

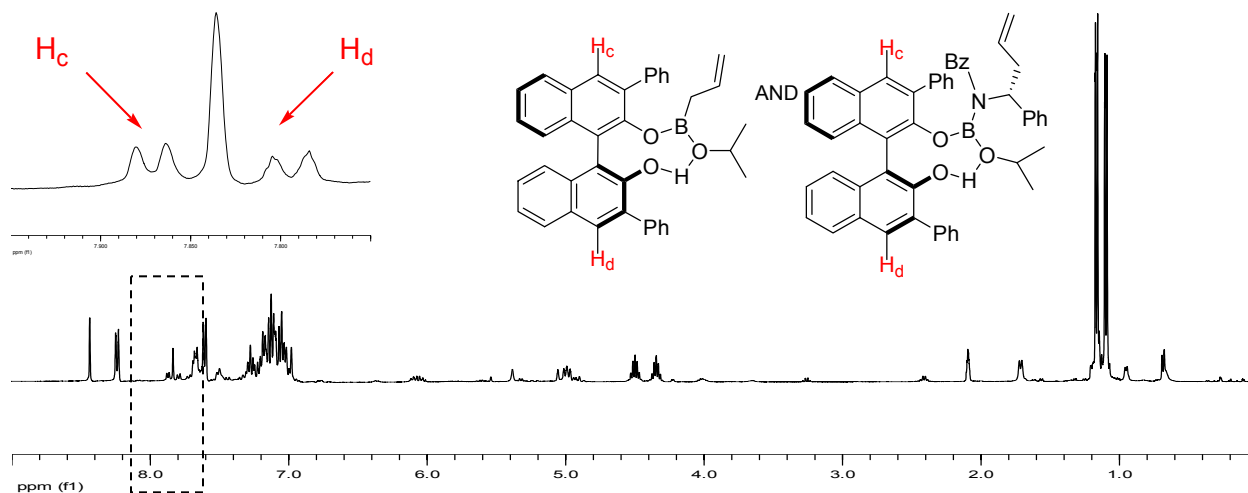

5 min

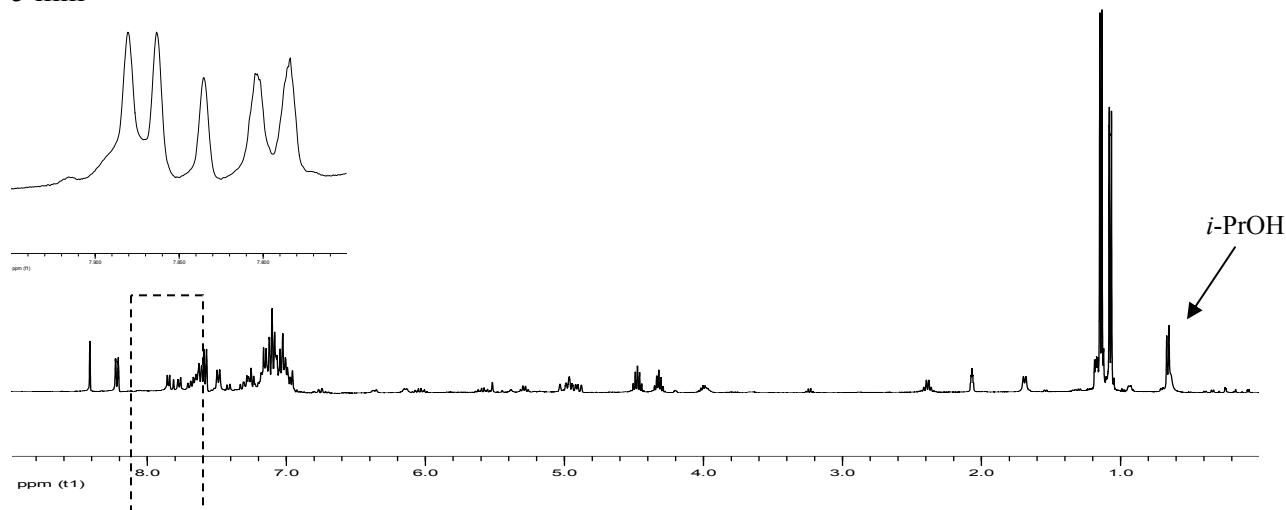

30 min

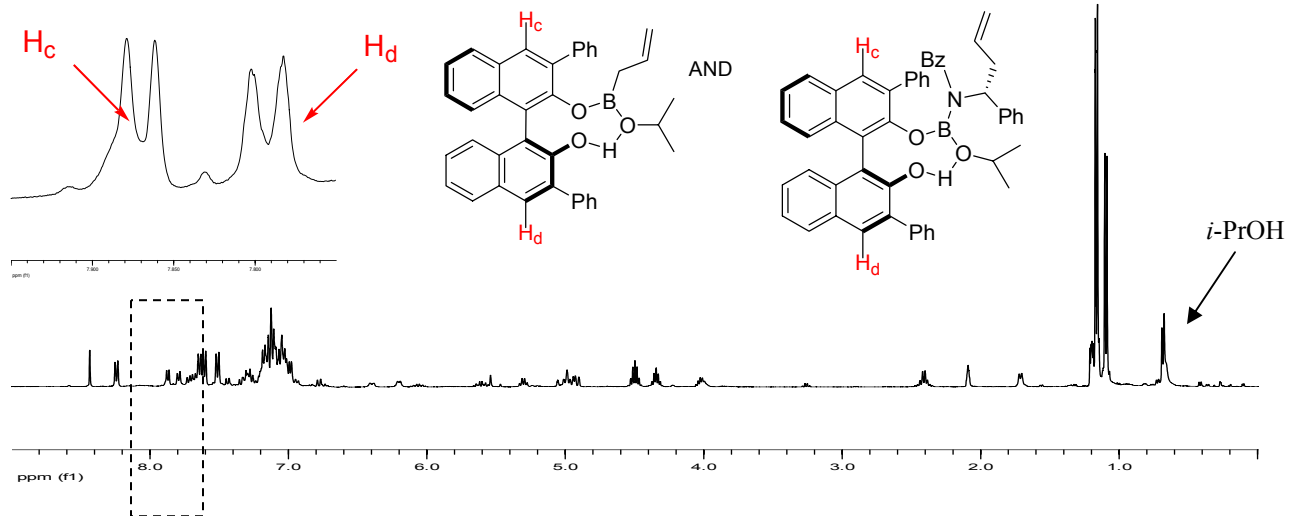

2 hr

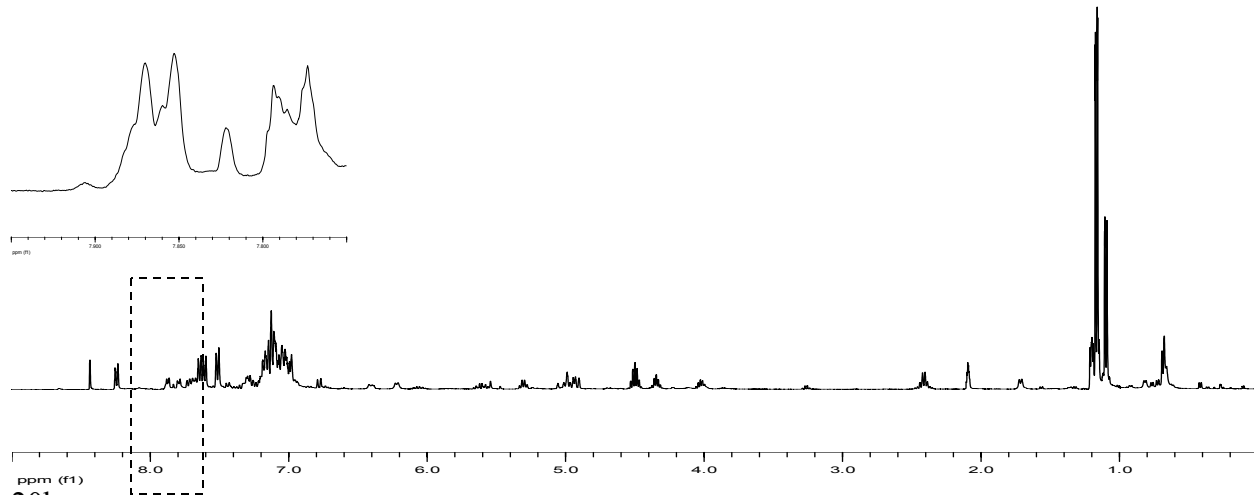

20hr

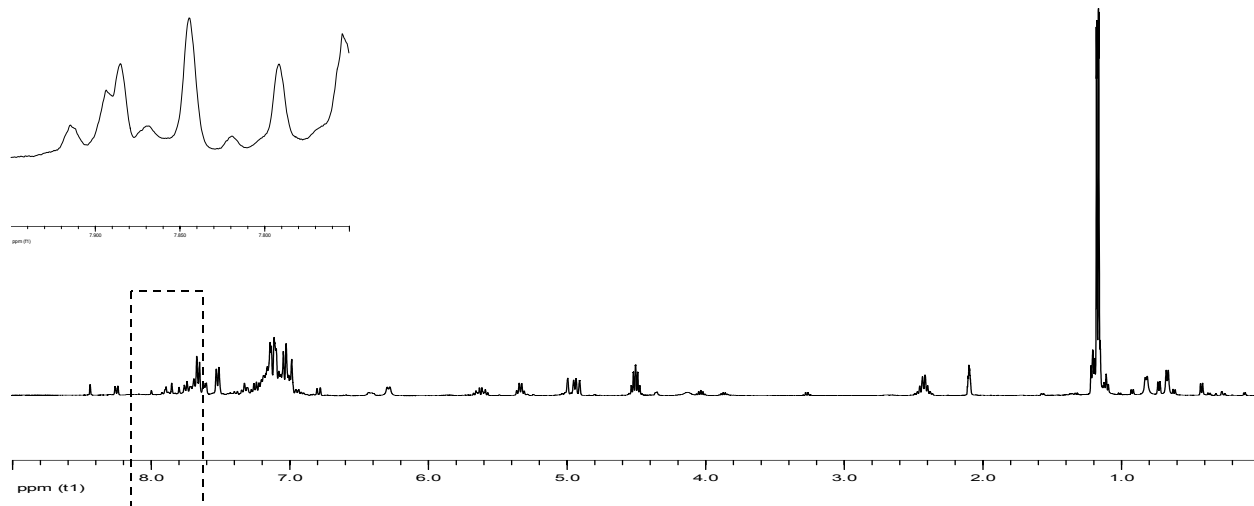



### Standard $^{11}\text{B}$ -NMR experiment:

In a dry vial the acyl imine **5** (16mg, 0.075 mmol) and (*S*)-3,3'-Ph<sub>2</sub>-BINOL **7h** (5mg, 0.011 mmol) was dissolved in CD<sub>3</sub>C<sub>6</sub>D<sub>5</sub> (1.0 mL) under Ar. The solution was transferred to a dry NMR tube under Ar and charged with allyldiisopropoxyborane **4** (20 uL, 0.075 mmol). Solution was monitored by  $^{11}\text{B}$ -NMR at room temperature for 48 hours. Disappearance of allyldiisopropoxyborane and appearance of the product was simultaneously monitored.

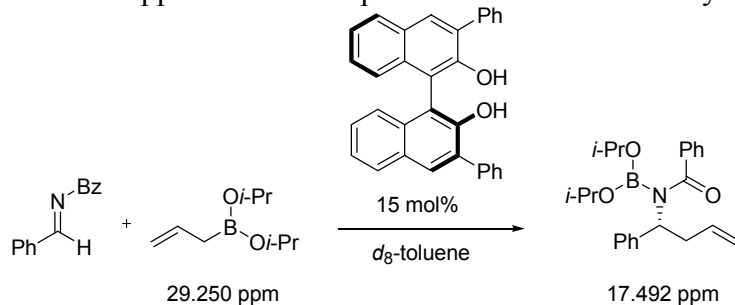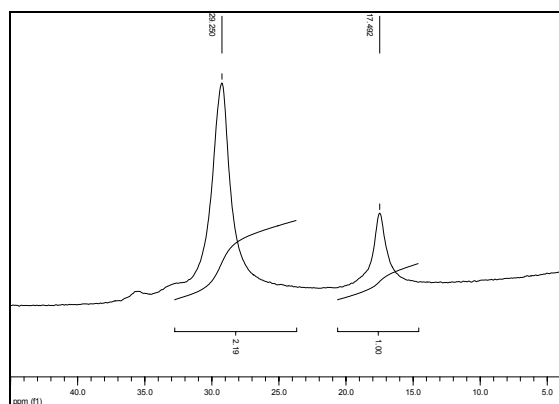

15 min

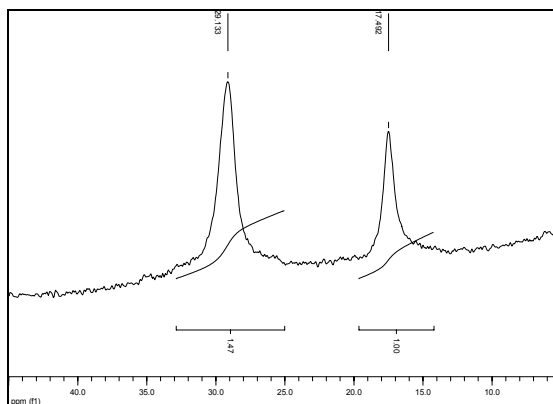

8 hr

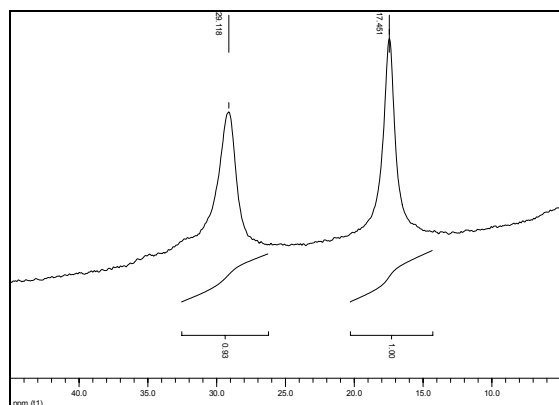

16 h

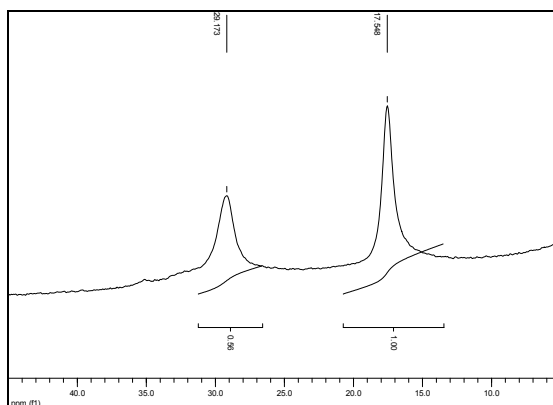

24 h

**Mass spectra**

To a dry vial was added allyldiisopropoxyborane **4** (40  $\mu\text{L}$ , 0.10 mmol) and  $\text{CD}_3\text{C}_6\text{D}_5$  (0.5 mL) under Ar. (*S*)-3,3'-Ph<sub>2</sub>-BINOL **7h** (6.8 mg, 0.015 mmol) was added. The solution was stirred under Ar at room temperature for 4 hours. This solution (0.1 mL) was directly infused into MicroMass ZQ 2000 mass spectrometer with positive electrospray ionization mode (ESI+, ES/voltages: capillary 3.01 KV, cone 24 V; Temperature: source 130 °C, desolvation 260 °C; Gas flow: desolvation 250 L/h, Cone 50 L/h; Pump flow: 60  $\mu\text{L}/\text{min}$ ). The mass of BINOL-boronate complex having one isopropoxy ligand was observed.

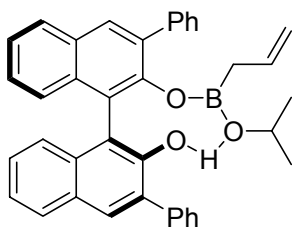

Chemical Formula:  $\text{C}_{38}\text{H}_{33}\text{BO}_3$   
Exact Mass: 548.2523

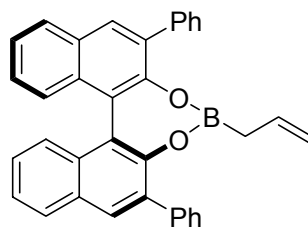

Chemical Formula:  $\text{C}_{35}\text{H}_{25}\text{BO}_2$   
Exact Mass: 488.1948

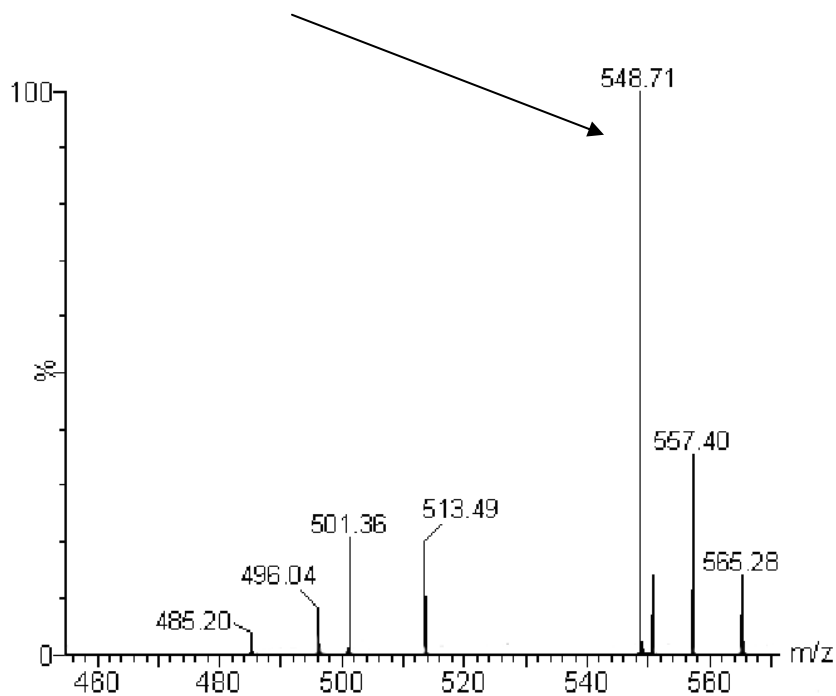

To a dry vial were added the acyl imine **5** (40 mg, 0.20 mmol), (*S*)-3,3'-Ph<sub>2</sub>-BINOL **7h** (44mg, 0.10 mmol) and CD<sub>3</sub>C<sub>6</sub>D<sub>5</sub> (5.0 mL) under Ar. The solution was charged with allyldiisopropoxyborane **4** (46 uL, 0.20 mmol). After 15 min, the solution (0.1 mL) was infused into MicroMass ZQ 2000 mass spectrometer with positive electron spray ionization mode (ESI+, ES/voltages: capillary 3.01 KV, cone 24 V; Temperature: source 130 °C, desolvation 260 °C; Gas flow: desolvation 250 L/h, Cone 50 L/h; Pump flow: 60 μL/min). The mass of homoallylic amide product having one isopropoxy ligand was observed.

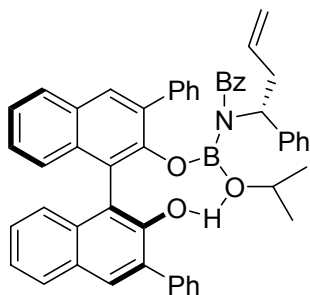

Chemical Formula: C<sub>52</sub>H<sub>44</sub>BNO<sub>4</sub>  
Calculated Mass: 757.34

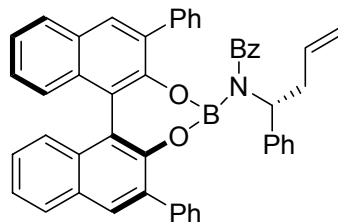

Chemical Formula: C<sub>49</sub>H<sub>36</sub>BNO<sub>3</sub>  
Calculated Mass: 697.28

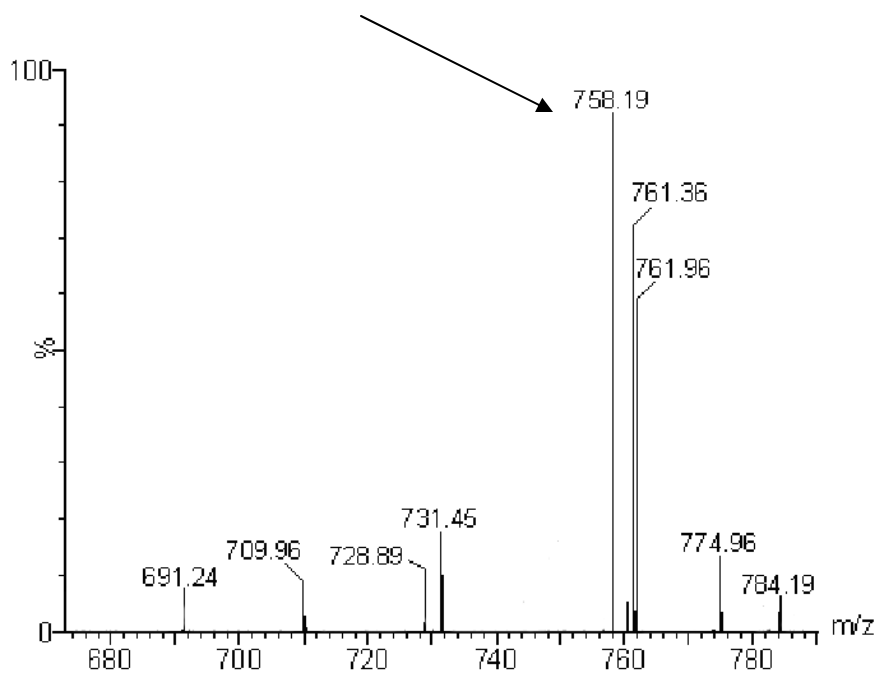

## NMR Spectra of Aliphatic Imines

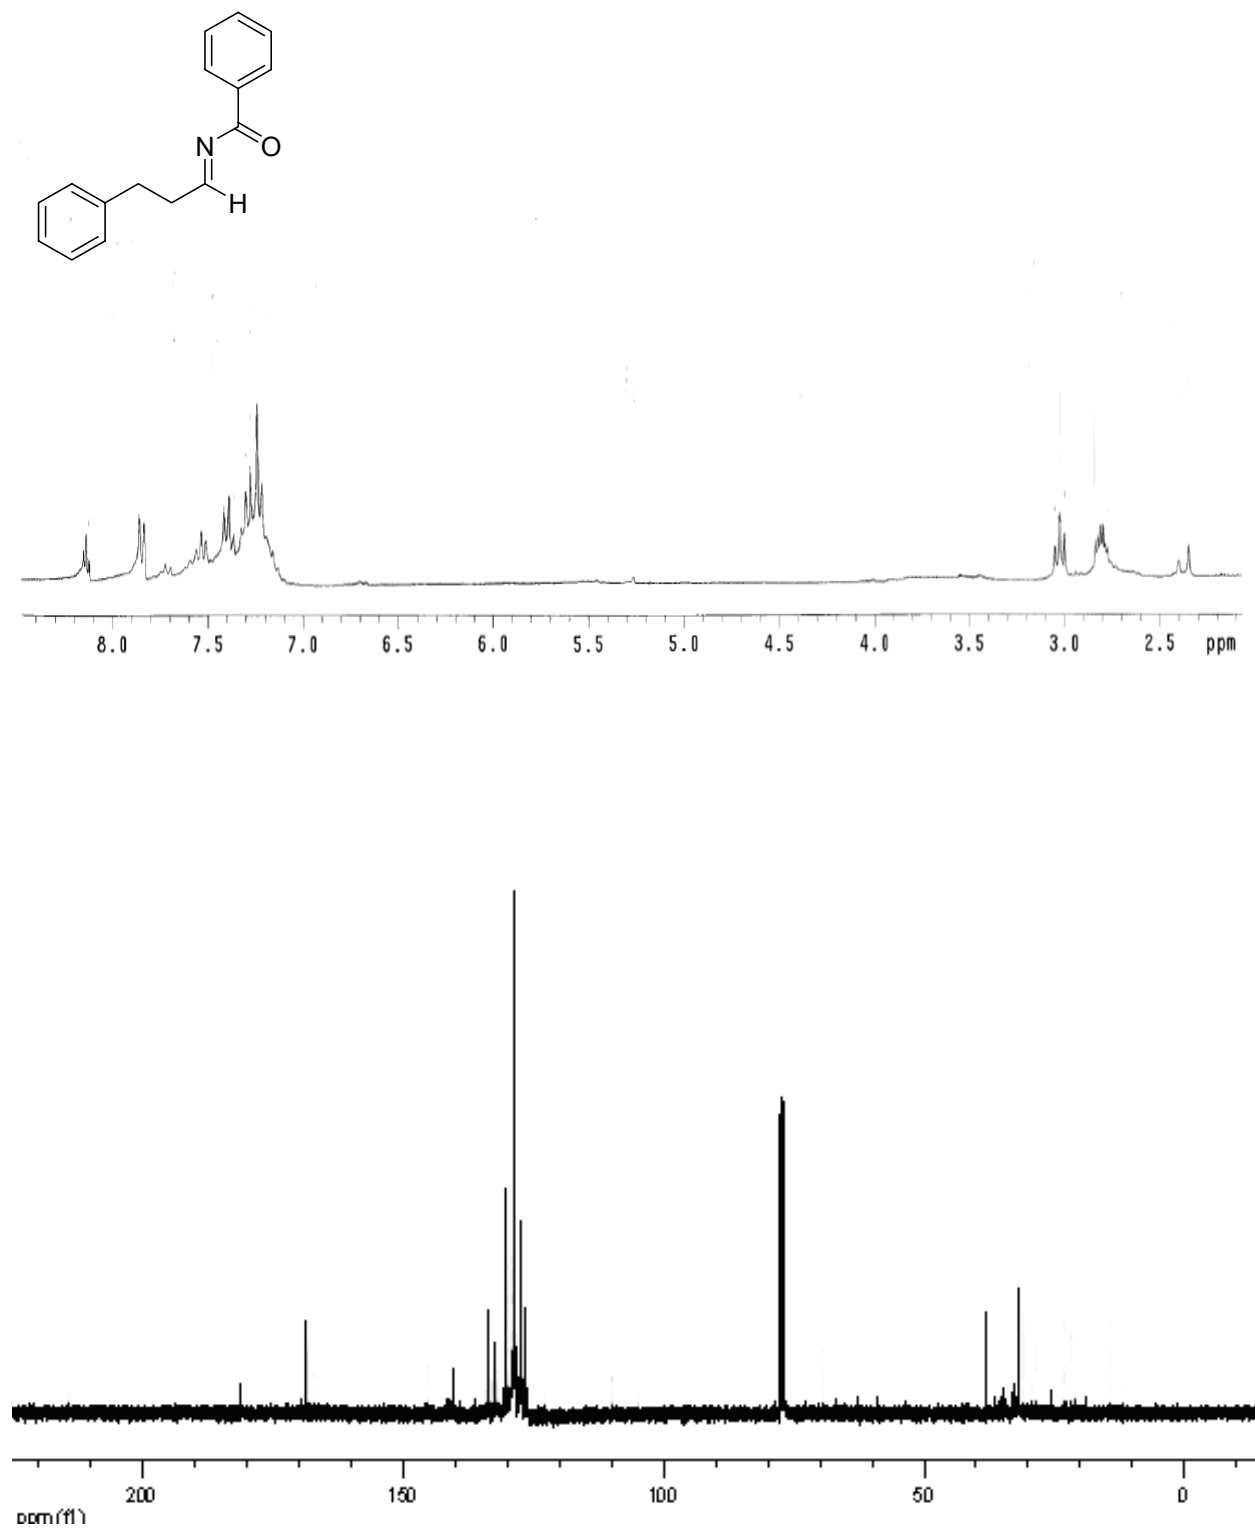

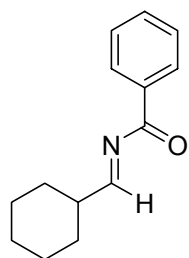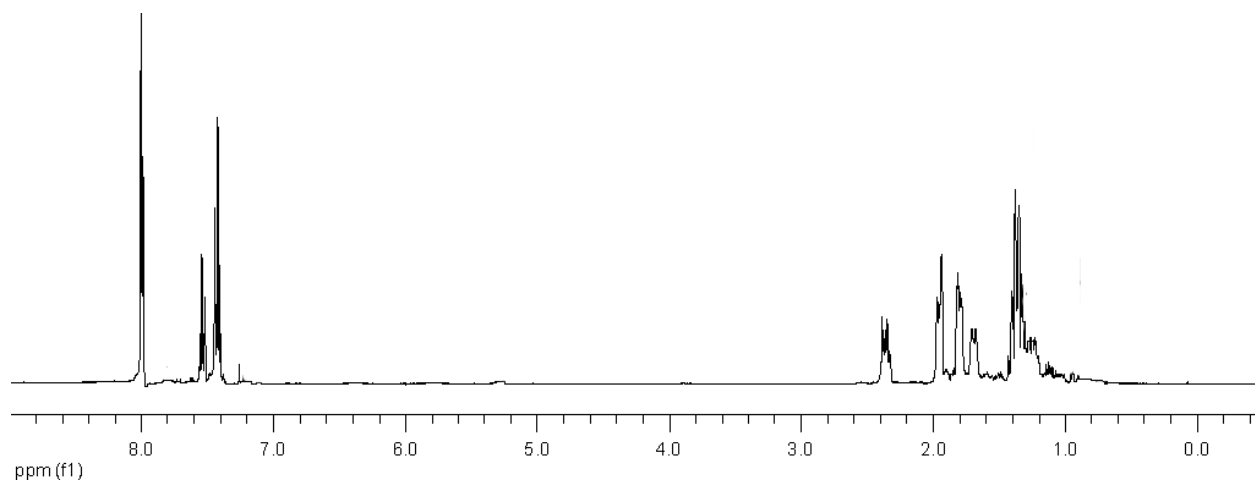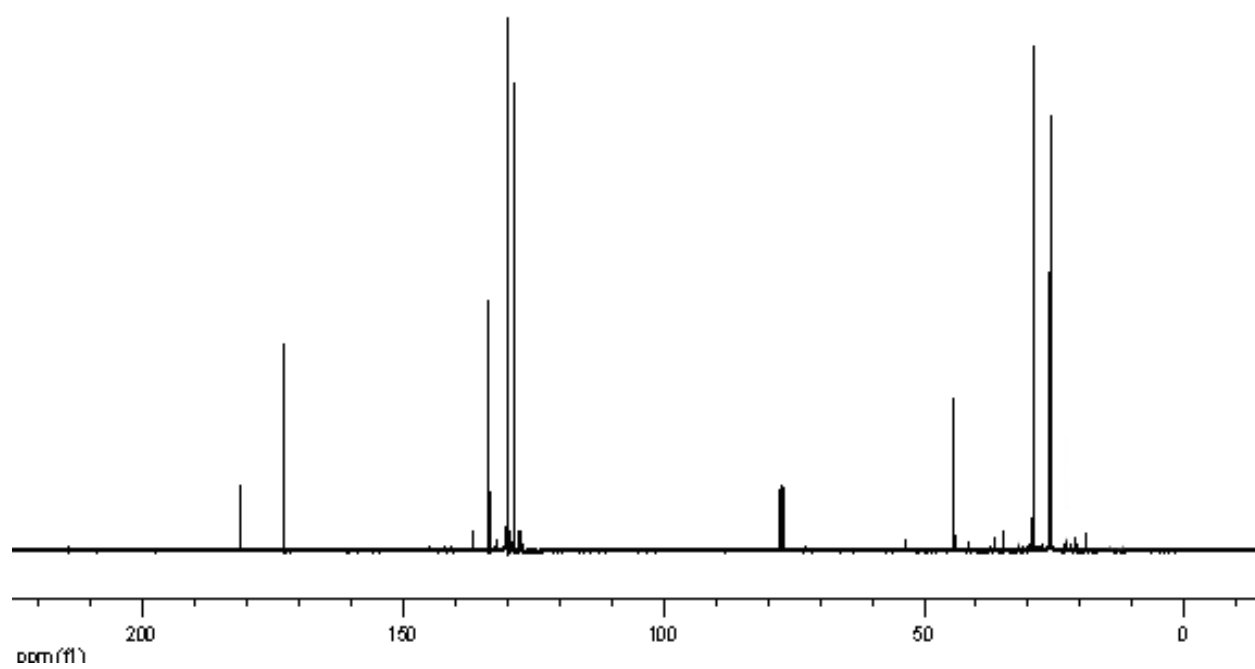

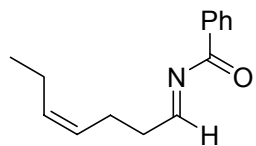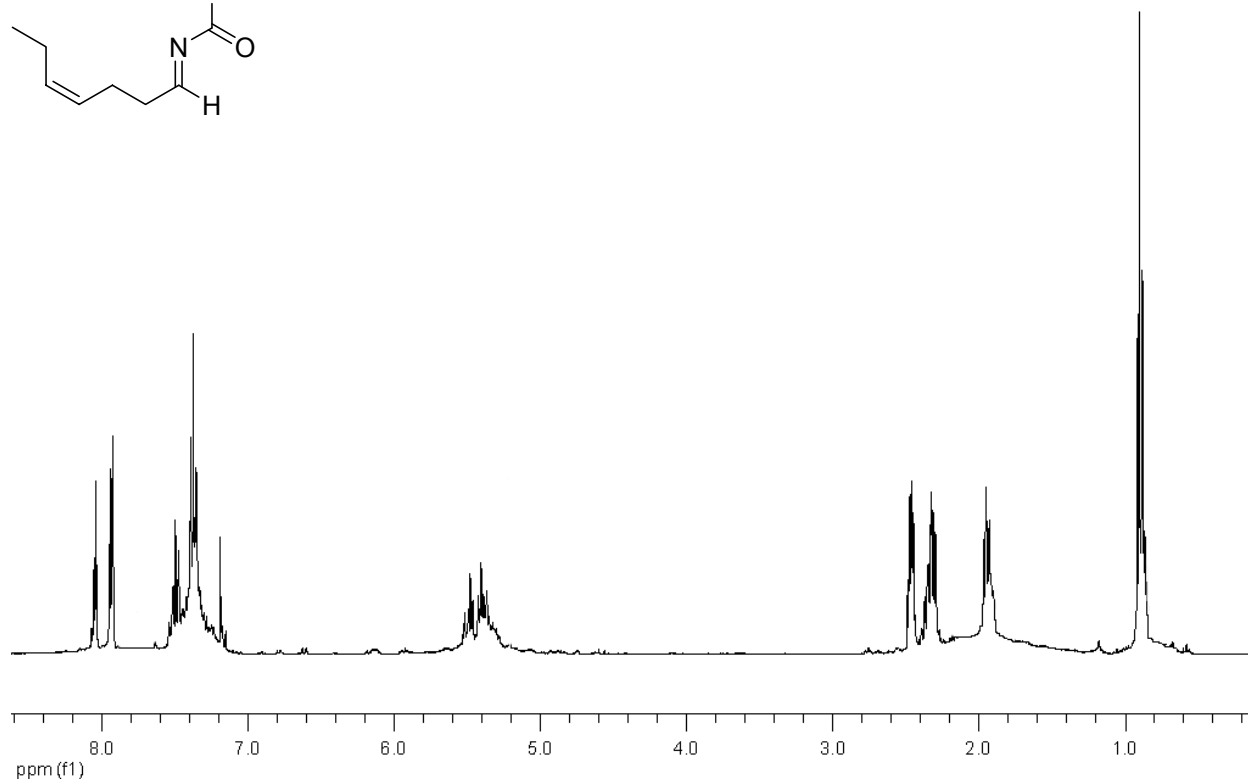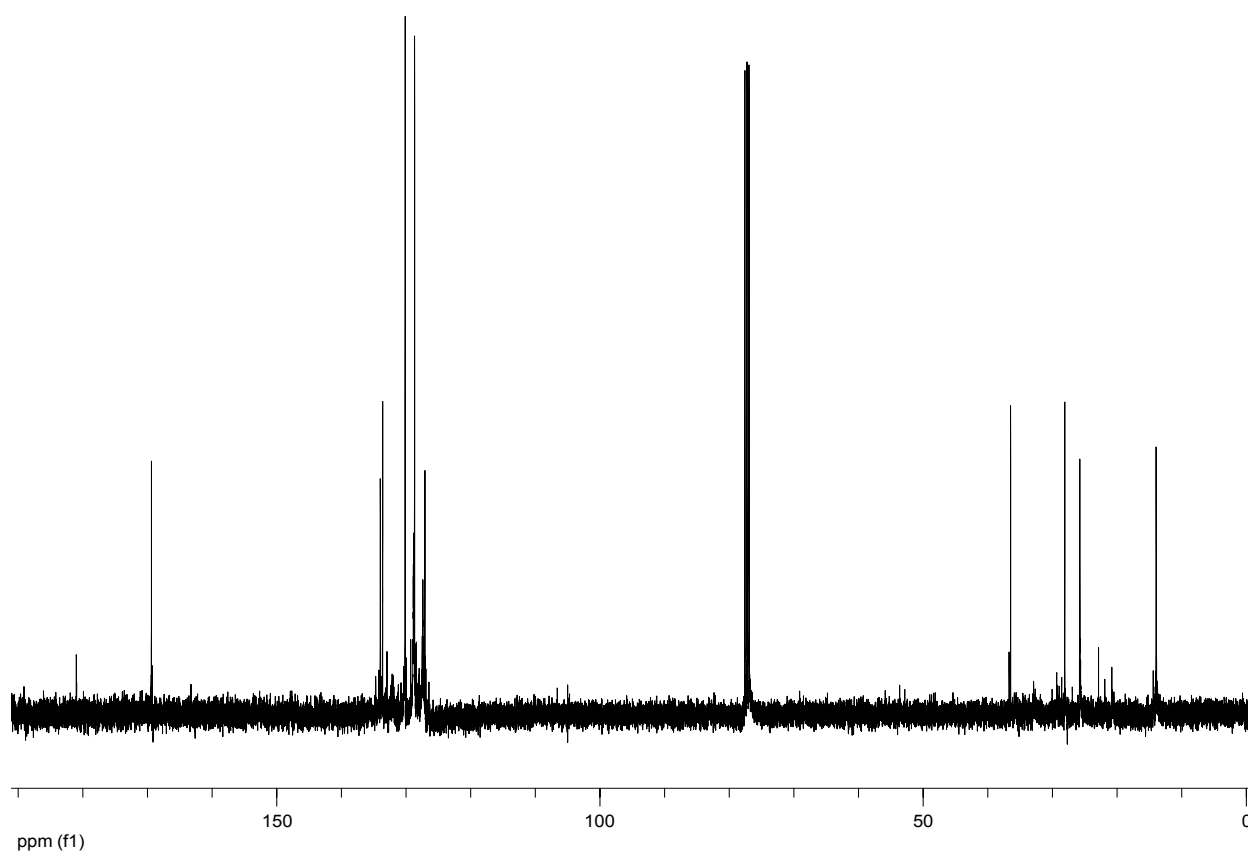

## Maraviroc

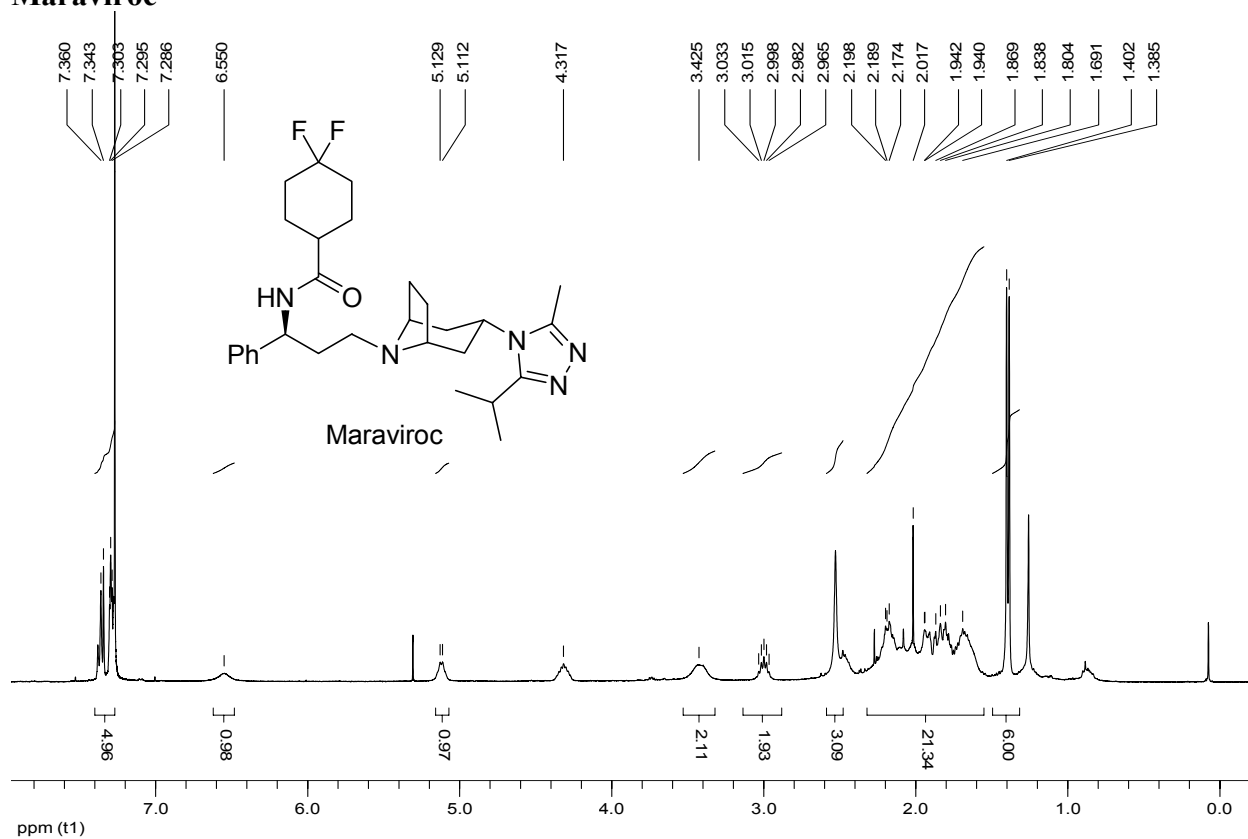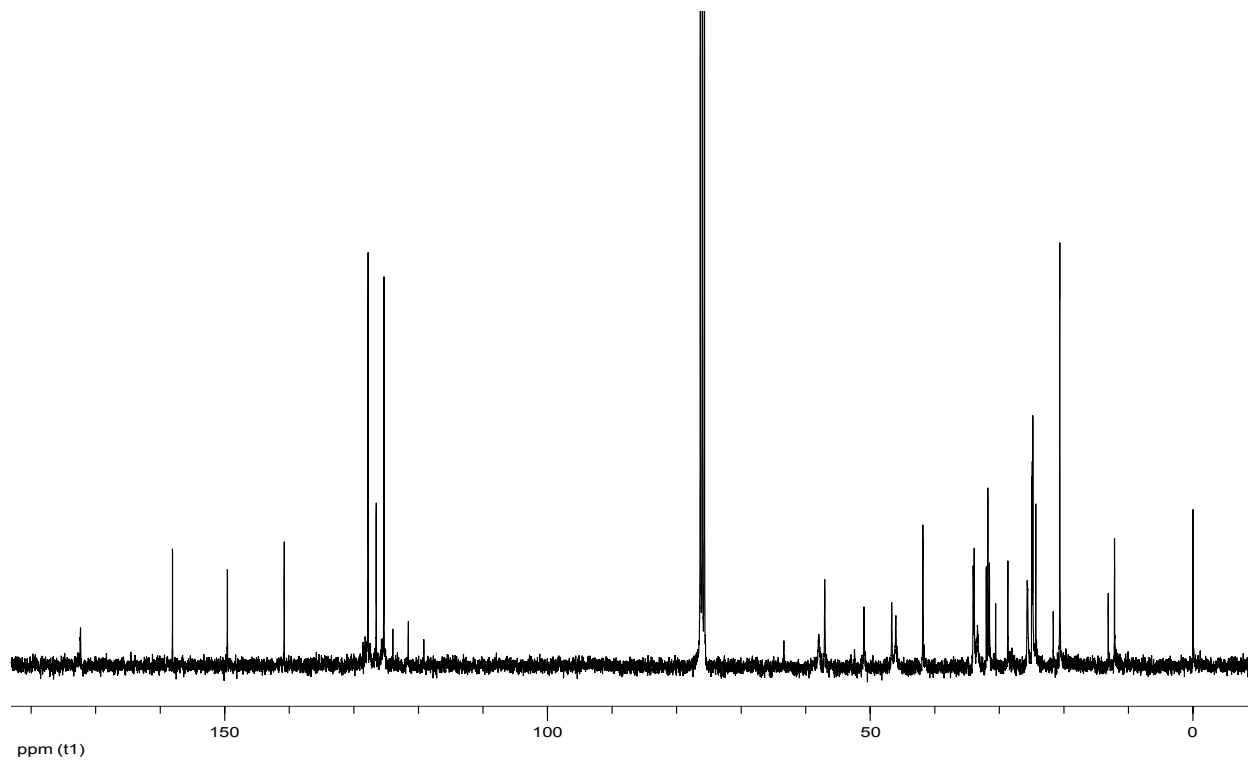

**Table 3, entry 1: 9a** Chiralcel<sup>®</sup> OD Column, Hexane:IPA = 90:10, 1.5 mL/min, 250 nm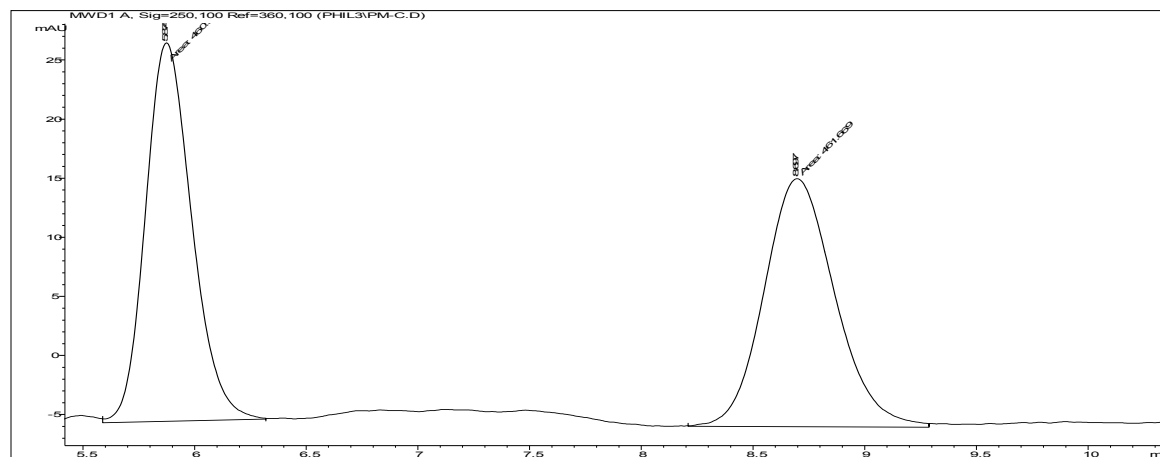

Signal 1: MWD1 A, Sig=250,100 Ref=360,100

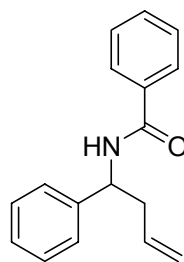

| Peak #   | RetTime [min] | Type | Width [min] | Area [mAU*s] | Height [mAU] | Area %  |
|----------|---------------|------|-------------|--------------|--------------|---------|
| 1        | 5.874         | MM   | 0.2398      | 460.98135    | 32.04158     | 49.9628 |
| 2        | 8.697         | MM   | 0.3667      | 461.66864    | 20.98511     | 50.0372 |
| Totals : |               |      |             | 922.64999    | 53.02669     |         |

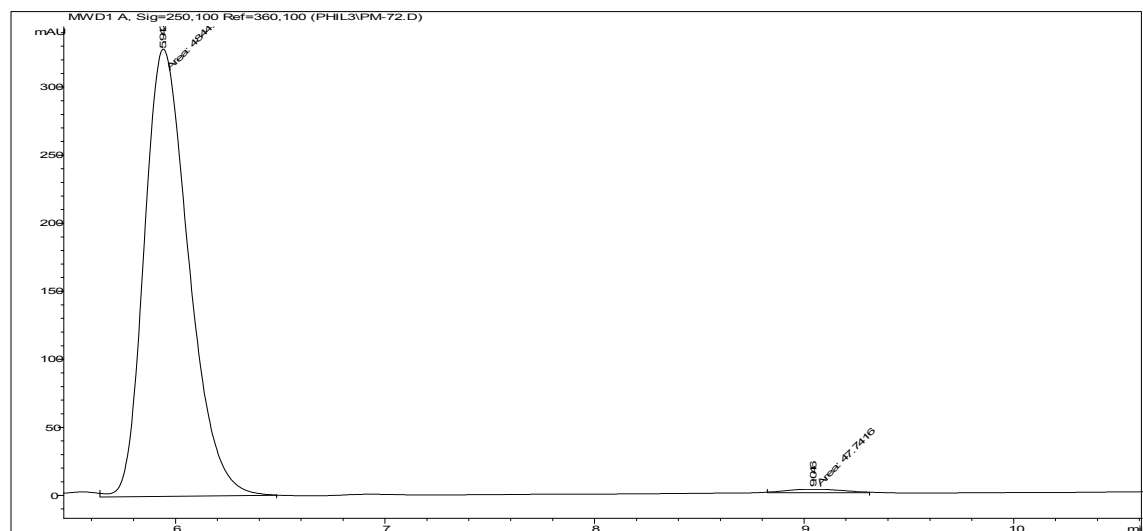

Signal 1: MWD1 A, Sig=250,100 Ref=360,100

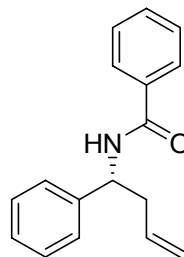

| Peak #   | RetTime [min] | Type | Width [min] | Area [mAU*s] | Height [mAU] | Area %  |
|----------|---------------|------|-------------|--------------|--------------|---------|
| 1        | 5.942         | MM   | 0.2455      | 4844.96533   | 328.87216    | 99.0242 |
| 2        | 9.046         | MM   | 0.3072      | 47.74155     | 2.59021      | 0.9758  |
| Totals : |               |      |             | 4892.70688   | 331.46237    |         |



**Table 3, entry 2, 9b:** Chiralcel®OD Column, Hexane:IPA = 90:10, 1.5 mL/min, 230 nm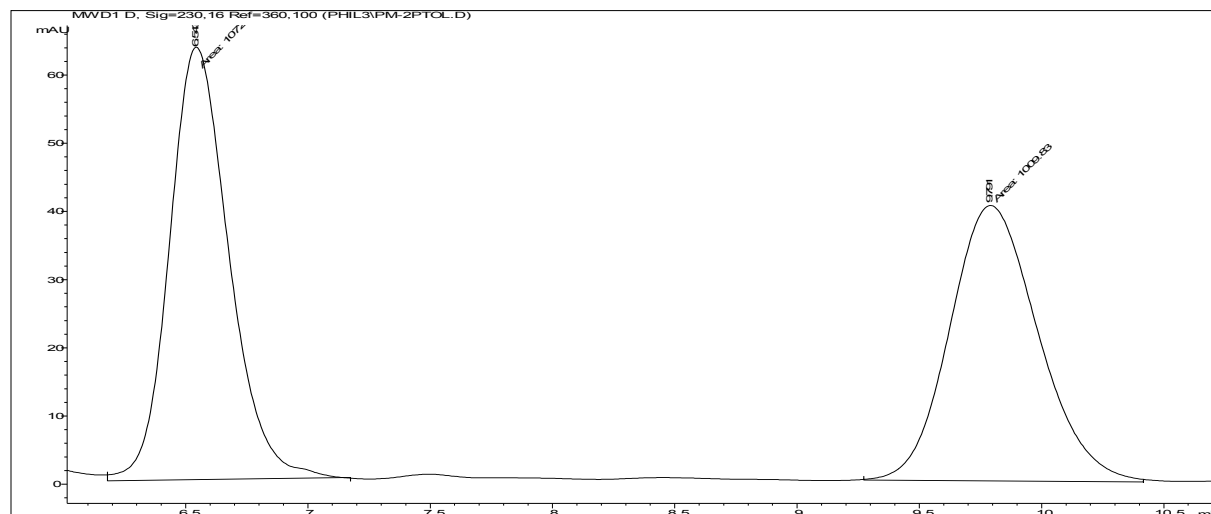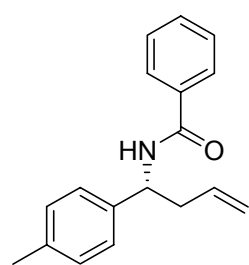

Signal 4: MWD1 D, Sig=230,16 Ref=360,100

| Peak #   | RetTime [min] | Type | Width [min] | Area [mAU*s] | Height [mAU] | Area %  |
|----------|---------------|------|-------------|--------------|--------------|---------|
| 1        | 6.543         | MM   | 0.2817      | 1072.62244   | 63.45734     | 51.5076 |
| 2        | 9.791         | MM   | 0.4168      | 1009.83295   | 40.37722     | 48.4924 |
| Totals : |               |      |             | 2082.45538   | 103.83456    |         |

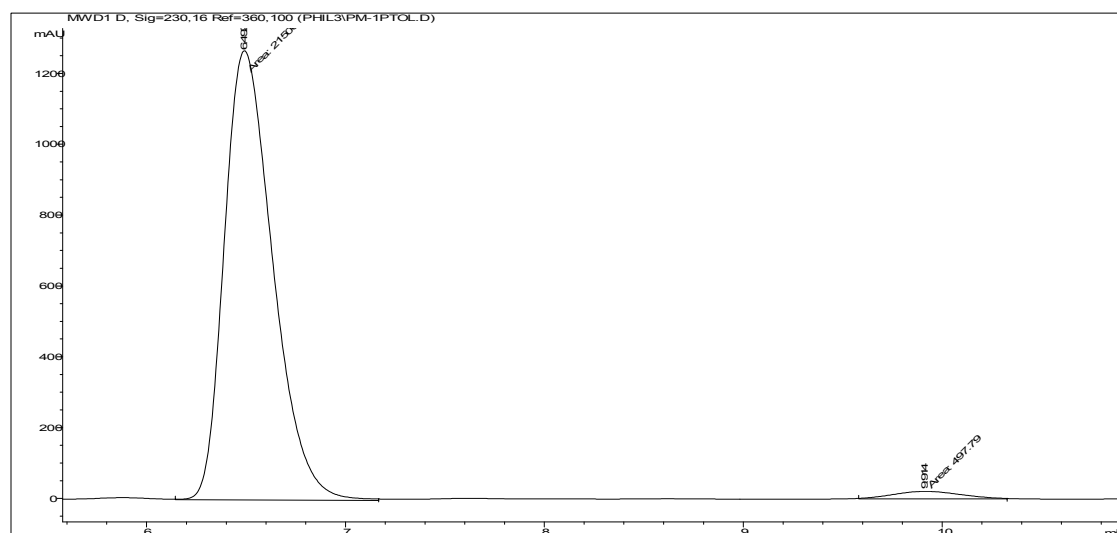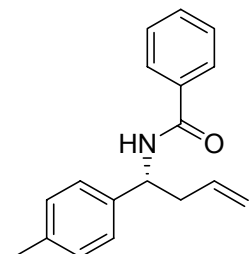

Signal 4: MWD1 D, Sig=230,16 Ref=360,100

| Peak #   | RetTime [min] | Type | Width [min] | Area [mAU*s] | Height [mAU] | Area %  |
|----------|---------------|------|-------------|--------------|--------------|---------|
| 1        | 6.492         | MM   | 0.2824      | 2.15001e4    | 1269.01355   | 97.7371 |
| 2        | 9.914         | MM   | 0.3944      | 497.79001    | 21.03384     | 2.2629  |
| Totals : |               |      |             | 2.19979e4    | 1290.04739   |         |

**Table 3, entry 3, 9c:** Chiralcel<sup>®</sup> OD Column, Hexane:IPA = 90:10, 1.5 mL/min, 210 nm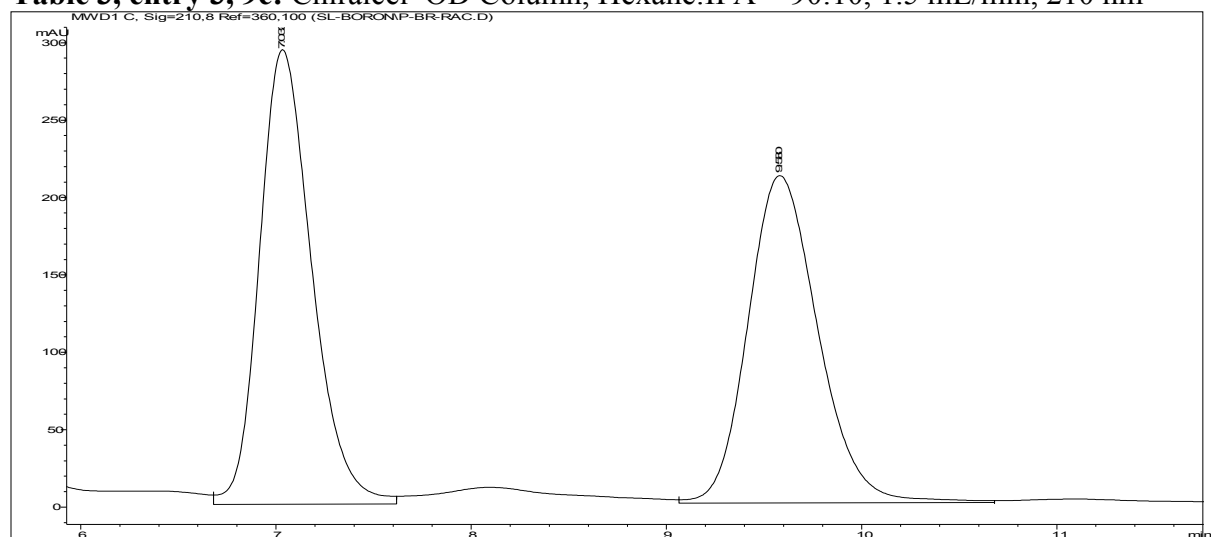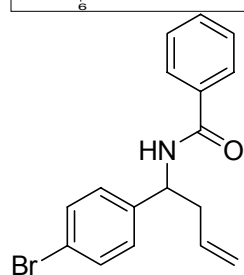

Signal 3: MWD1 C, Sig=210,8 Ref=360,100

| Peak #   | RetTime [min] | Type | width [min] | Area [mAU*s] | Height [mAU] | Area %  |
|----------|---------------|------|-------------|--------------|--------------|---------|
| 1        | 7.033         | VV   | 0.2893      | 5467.69482   | 293.55197    | 50.8933 |
| 2        | 9.580         | VB   | 0.3870      | 5275.75000   | 211.50700    | 49.1067 |
| Totals : |               |      |             | 1.07434e4    | 505.05898    |         |

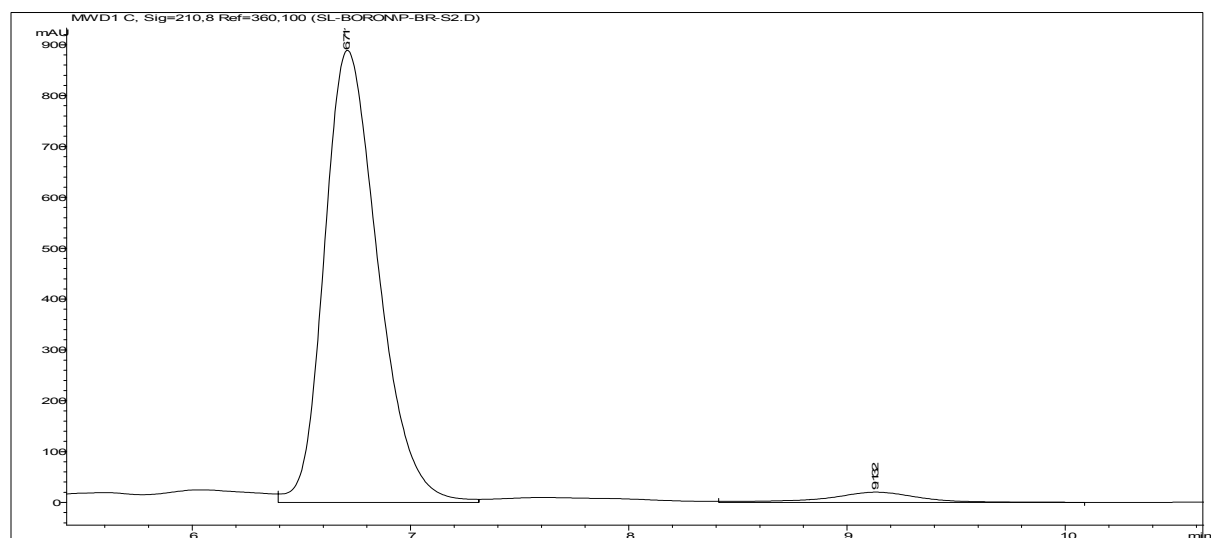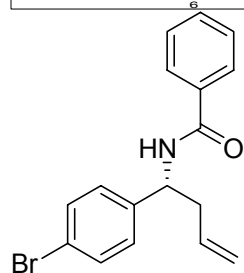

Signal 3: MWD1 C, Sig=210,8 Ref=360,100

| Peak #   | RetTime [min] | Type | width [min] | Area [mAU*s] | Height [mAU] | Area %  |
|----------|---------------|------|-------------|--------------|--------------|---------|
| 1        | 6.711         | MM   | 0.2817      | 1.48848e4    | 880.75336    | 97.5460 |
| 2        | 9.141         | MM   | 0.3555      | 374.46323    | 17.55733     | 2.4540  |
| Totals : |               |      |             | 1.52592e4    | 898.31069    |         |

**Table 3, entry 4, 9d:** Chiralcel<sup>®</sup> OD Column, Hexane:IPA = 90:10, 1.5 mL/min, 210 nm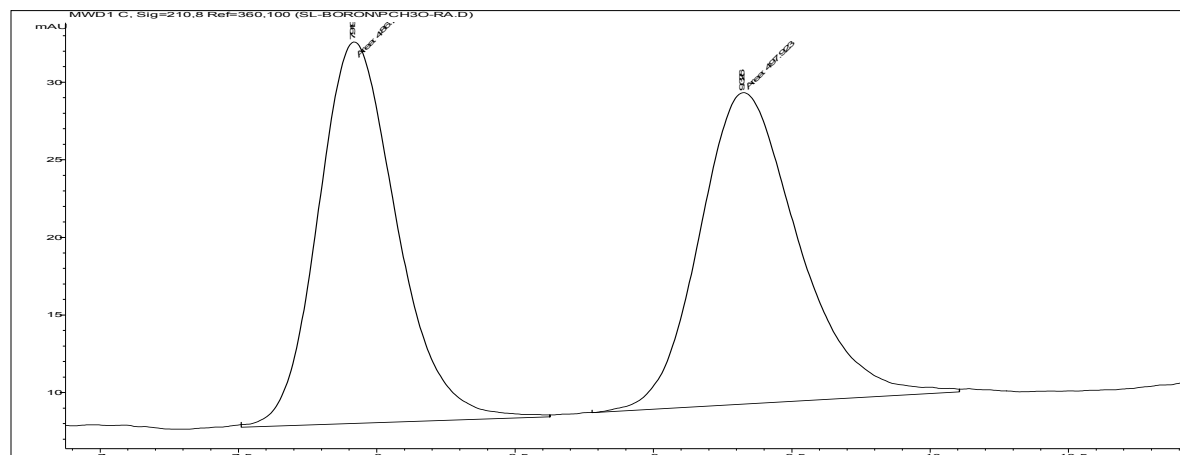

Signal 3: MWD1 C, Sig=210,8 Ref=360,100

| Peak #   | RetTime [min] | Type | Width [min] | Area [mAU*s] | Height [mAU] | Area %  |
|----------|---------------|------|-------------|--------------|--------------|---------|
| 1        | 7.919         | MM   | 0.3299      | 486.70691    | 24.59229     | 49.4304 |
| 2        | 9.326         | MM   | 0.4134      | 497.92310    | 20.07438     | 50.5696 |
| Totals : |               |      |             | 984.63000    | 44.66667     |         |

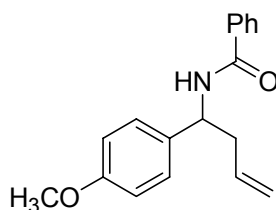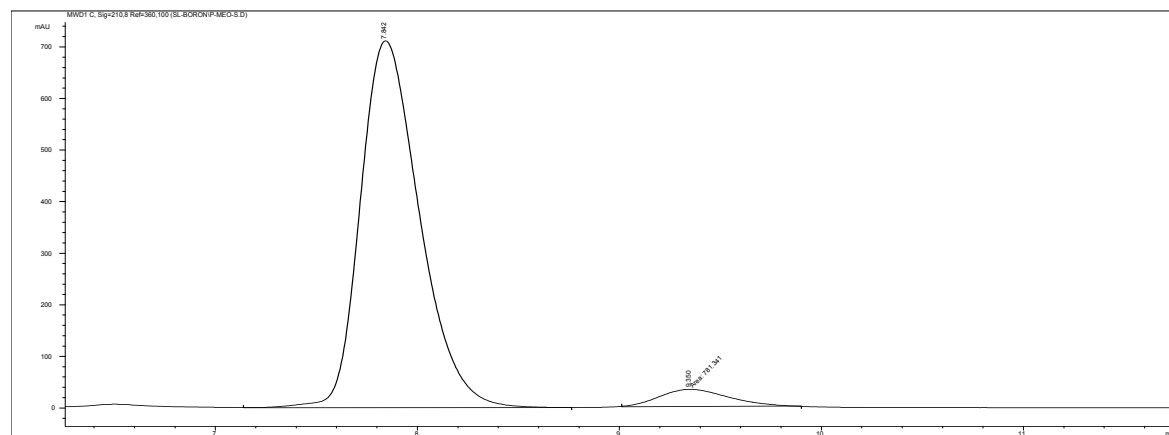

Signal 3: MWD1 C, Sig=210,8 Ref=360,100

| Peak #   | RetTime [min] | Type | Width [min] | Area [mAU*s] | Height [mAU] | Area %  |
|----------|---------------|------|-------------|--------------|--------------|---------|
| 1        | 7.842         | VV   | 0.3137      | 1.44910e4    | 711.34308    | 94.8840 |
| 2        | 9.350         | MM   | 0.3931      | 781.34064    | 33.12932     | 5.1160  |
| Totals : |               |      |             | 1.52724e4    | 744.47240    |         |

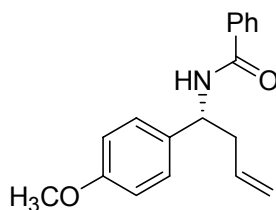

**Table 3, entry 5, 9e:** Chiralcel<sup>®</sup> OD Column, Hexane:IPA = 90:10, 1.5 mL/min, 210 nm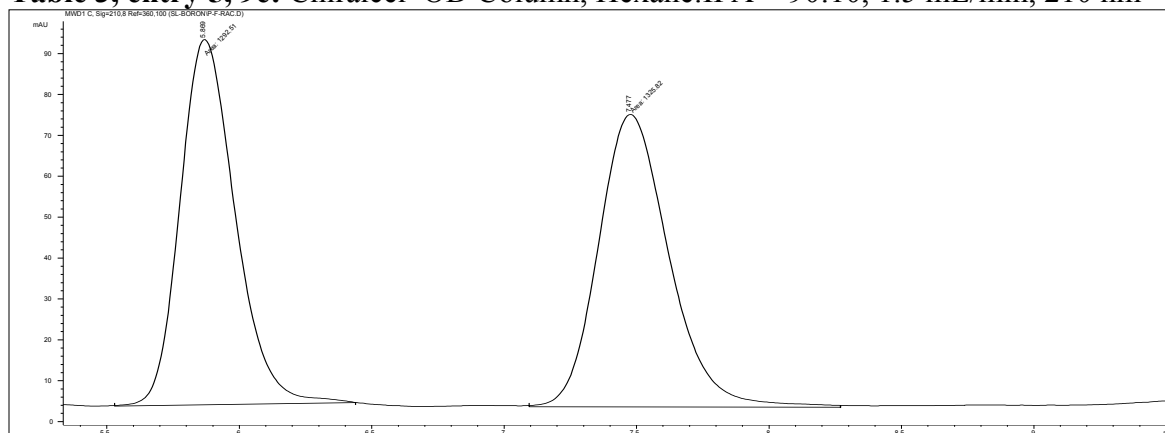

Signal 3: MWD1 C, Sig=210,8 Ref=360,100

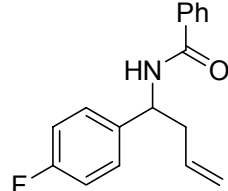

| Peak #   | RetTime [min] | Type | width [min] | Area [mAU*s] | Height [mAU] | Area %  |
|----------|---------------|------|-------------|--------------|--------------|---------|
| 1        | 5.869         | MM   | 0.2412      | 1292.50537   | 89.32421     | 49.3638 |
| 2        | 7.477         | MM   | 0.3089      | 1325.81873   | 71.52424     | 50.6362 |
| Totals : |               |      |             | 2618.32410   | 160.84845    |         |

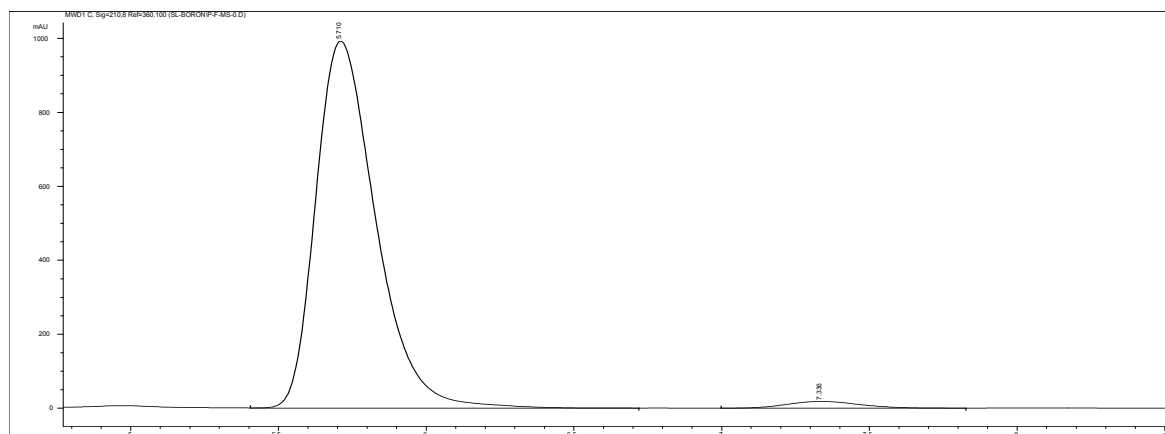

Signal 3: MWD1 C, Sig=210,8 Ref=360,100

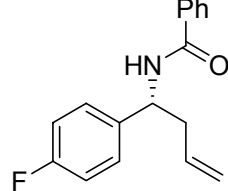

| Peak #   | RetTime [min] | Type | width [min] | Area [mAU*s] | Height [mAU] | Area %  |
|----------|---------------|------|-------------|--------------|--------------|---------|
| 1        | 5.710         | VB   | 0.2172      | 1.40494e4    | 992.48022    | 97.8511 |
| 2        | 7.336         | VP   | 0.2645      | 308.53735    | 18.13293     | 2.1489  |
| Totals : |               |      |             | 1.43579e4    | 1010.61316   |         |

**Table 3, entry 6, 9f:** Chiralcel<sup>®</sup> OD Column, Hexane:IPA = 90:10, 1.5 mL/min, 210 nm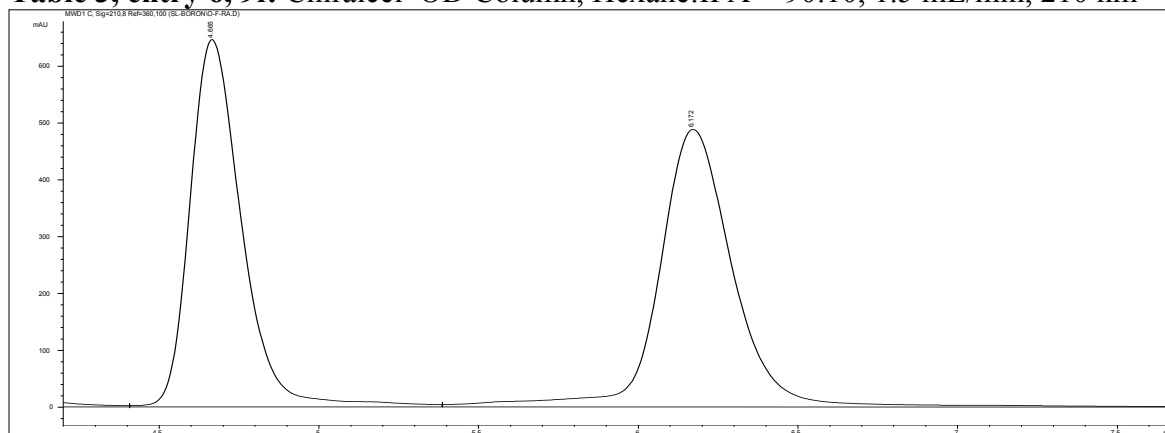

Ph Signal 3: MWD1 C, Sig=210,8 Ref=360,100

| Peak #   | RetTime [min] | Type | Width [min] | Area [mAU*s] | Height [mAU] | Area %  |
|----------|---------------|------|-------------|--------------|--------------|---------|
| 1        | 4.665         | MM   | 0.1790      | 6887.73730   | 641.48547    | 49.7373 |
| 2        | 6.172         | MM   | 0.2428      | 6960.50195   | 477.70819    | 50.2627 |
| Totals : |               |      |             | 1.38482e4    | 1119.19366   |         |

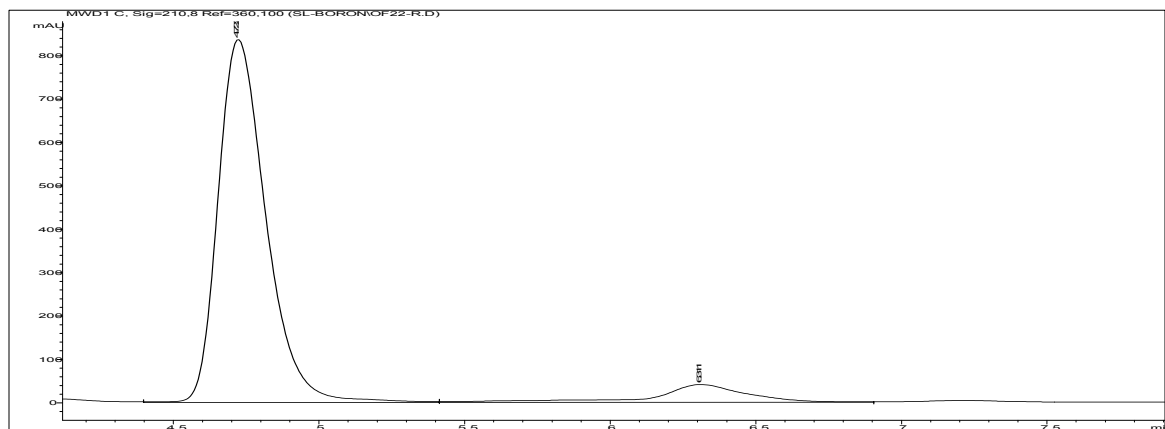

Ph Signal 3: MWD1 C, Sig=210,8 Ref=360,100

| Peak #   | RetTime [min] | Type | Width [min] | Area [mAU*s] | Height [mAU] | Area %  |
|----------|---------------|------|-------------|--------------|--------------|---------|
| 1        | 4.722         | VV   | 0.1753      | 9565.36133   | 836.96912    | 95.5123 |
| 2        | 6.311         | MM   | 0.2272      | 449.43320    | 32.96613     | 4.4877  |
| Totals : |               |      |             | 1.00148e4    | 869.93524    |         |

**Table 3, entry 7, 9g:** Chiralcel<sup>®</sup>OD Column, Hexane:IPA = 90:10, 1.5 mL/min, 210 nm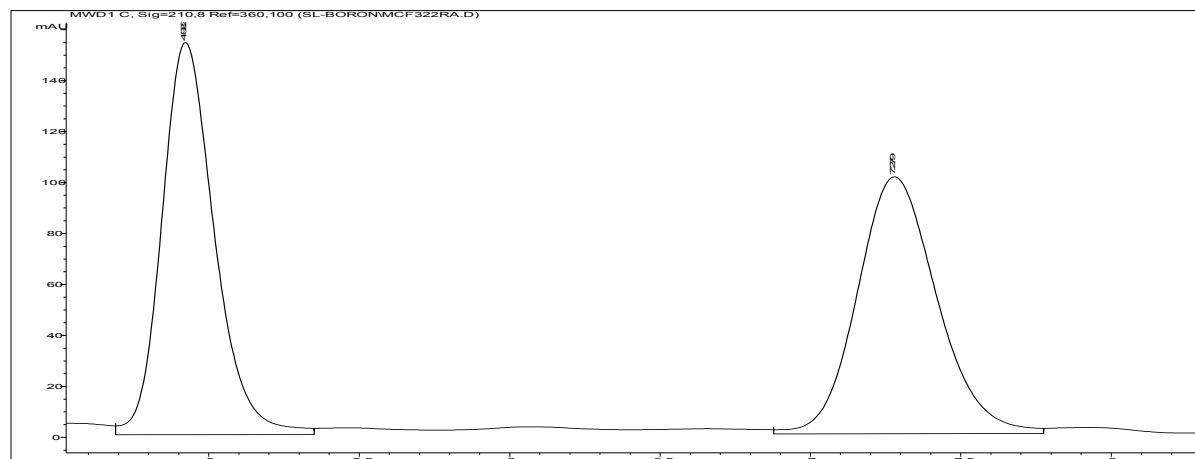

Ph Signal 3: MWD1 C, Sig=210,8 Ref=360,100

| Peak #   | RetTime [min] | Type | Width [min] | Area [mAU*s] | Height [mAU] | Area %  |
|----------|---------------|------|-------------|--------------|--------------|---------|
| 1        | 4.922         | VV   | 0.1859      | 1874.17468   | 154.05171    | 50.2262 |
| 2        | 7.279         | VV   | 0.2849      | 1857.29565   | 100.83331    | 49.7738 |
| Totals : |               |      | 3731.47034  | 254.88502    |              |         |

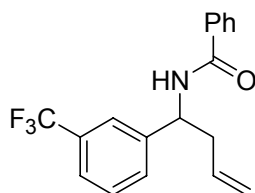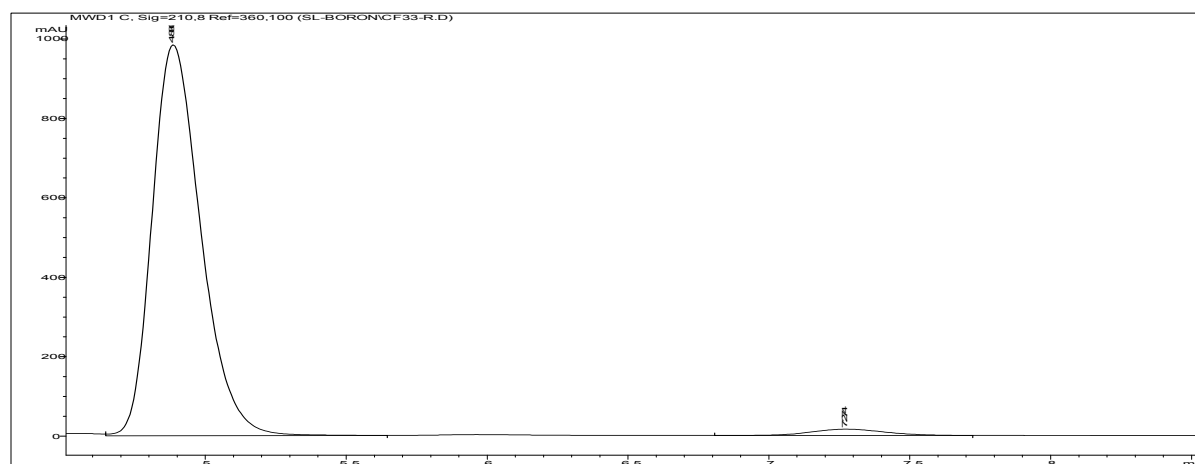

Ph Signal 3: MWD1 C, Sig=210,8 Ref=360,100

| Peak #   | RetTime [min] | Type | Width [min] | Area [mAU*s] | Height [mAU] | Area %  |
|----------|---------------|------|-------------|--------------|--------------|---------|
| 1        | 4.886         | VB   | 0.1863      | 1.18352e4    | 984.28387    | 97.5079 |
| 2        | 7.274         | VV   | 0.2841      | 302.48611    | 16.03446     | 2.4921  |
| Totals : |               |      | 1.21377e4   | 1000.31833   |              |         |

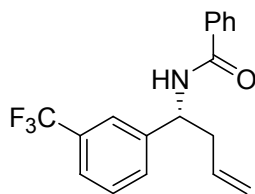

**Table 3, entry 8, 9h:** Chiralcel<sup>®</sup> OD Column, Hexane:IPA = 90:10, 1.5 mL/min, 210 nm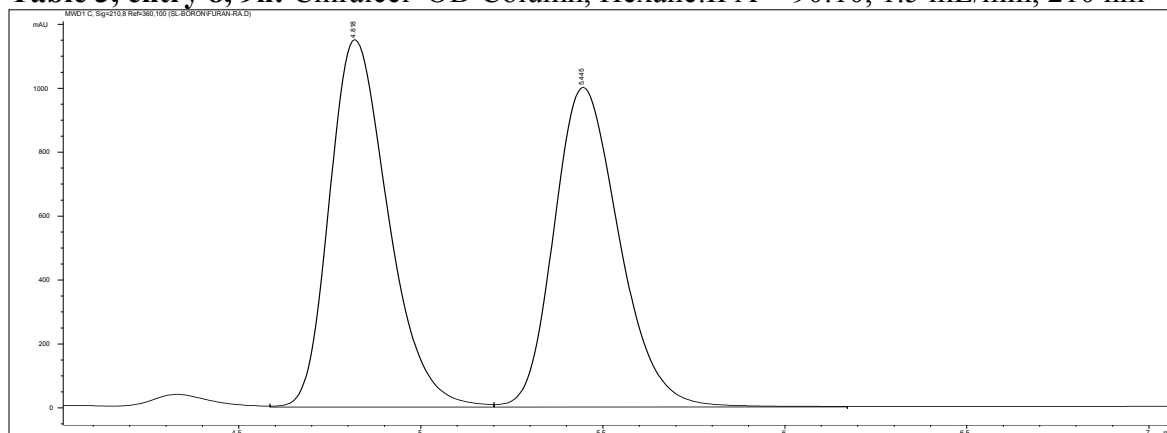

Ph Signal 3: MWD1 C, Sig=210,8 Ref=360,100

| Peak #   | RetTime [min] | Type | Width [min] | Area [mAU*s] | Height [mAU] | Area %  |
|----------|---------------|------|-------------|--------------|--------------|---------|
| 1        | 4.818         | VV   | 0.1729      | 1.29056e4    | 1149.97949   | 50.8263 |
| 2        | 5.445         | VB   | 0.1936      | 1.24860e4    | 1000.35681   | 49.1737 |
| Totals : |               |      | 2.53916e4   | 2150.33630   |              |         |

Chemical structure of the enantiomer with a wedged bond to the vinyl group: C=CC[C@@H](c1ccoc1)NC(=O)c2ccccc2

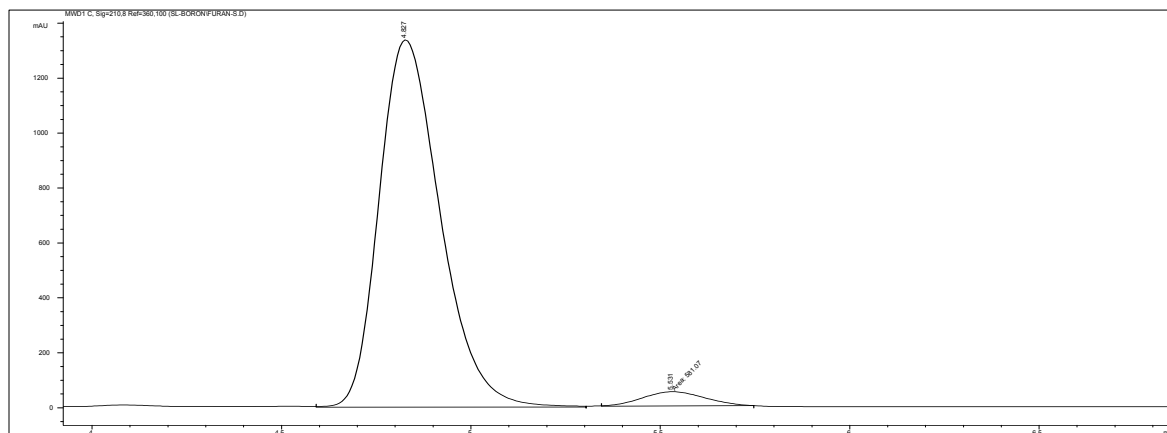

Ph Signal 3: MWD1 C, Sig=210,8 Ref=360,100

| Peak #   | RetTime [min] | Type | Width [min] | Area [mAU*s] | Height [mAU] | Area %  |
|----------|---------------|------|-------------|--------------|--------------|---------|
| 1        | 4.827         | VV   | 0.1748      | 1.49942e4    | 1336.92786   | 96.2693 |
| 2        | 5.531         | MM   | 0.1891      | 581.06952    | 51.20559     | 3.7307  |
| Totals : |               |      | 1.55753e4   | 1388.13345   |              |         |

Chemical structure of the enantiomer with a dashed bond to the vinyl group: C=CC[C@H](c1ccoc1)NC(=O)c2ccccc2

**Table 3, entry 9, 9i:** Chiralcel® OD Column, Hexane:IPA = 90:10, 1.5 mL/min, 210 nm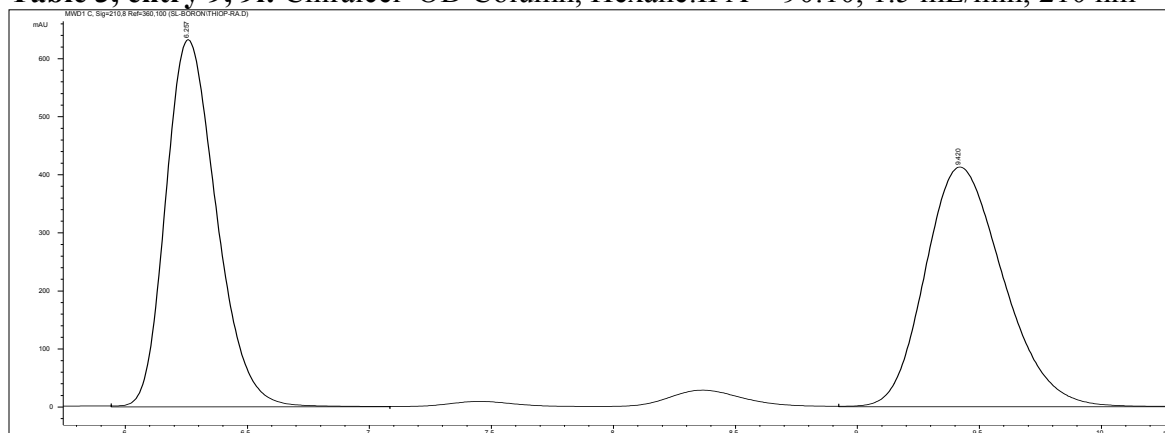

Ph Signal 3: MWD1 C, Sig=210,8 Ref=360,100

| Peak #   | RetTime [min] | Type | Width [min] | Area [mAU*s] | Height [mAU] | Area %  |
|----------|---------------|------|-------------|--------------|--------------|---------|
| 1        | 6.257         | VB   | 0.2246      | 9138.05762   | 632.39270    | 49.8643 |
| 2        | 9.420         | VB   | 0.3498      | 9187.80469   | 412.66037    | 50.1357 |
| Totals : |               |      | 1.83259e4   | 1045.05307   |              |         |

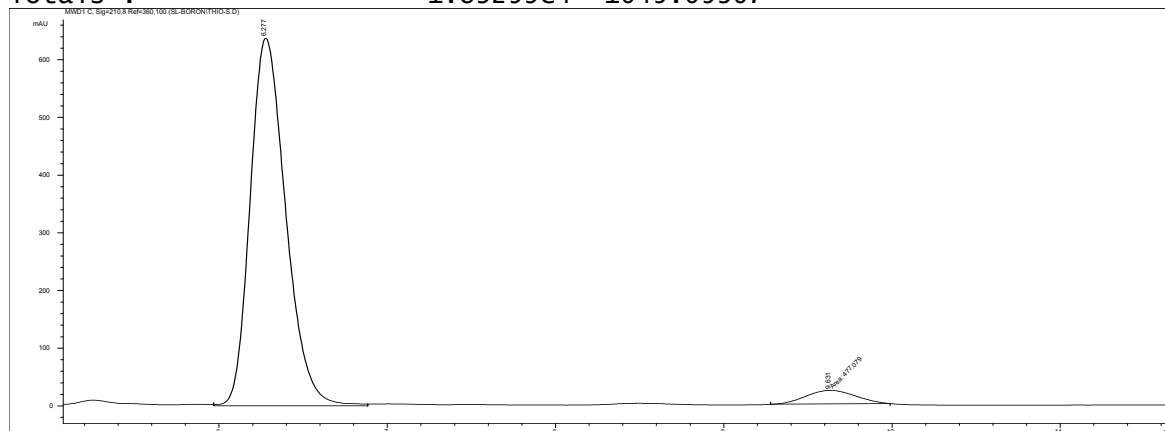

Ph Signal 3: MWD1 C, Sig=210,8 Ref=360,100

| Peak #   | RetTime [min] | Type | Width [min] | Area [mAU*s] | Height [mAU] | Area %  |
|----------|---------------|------|-------------|--------------|--------------|---------|
| 1        | 6.277         | VV   | 0.2294      | 9359.82520   | 637.17743    | 95.1501 |
| 2        | 9.631         | MM   | 0.3395      | 477.07889    | 23.41896     | 4.8499  |
| Totals : |               |      | 9836.90408  | 660.59639    |              |         |



**Table 3, entry 10, 9j:** Chiralcel<sup>®</sup> OD Column, Hexane:IPA = 90:10, 1.5 mL/min, 210 nm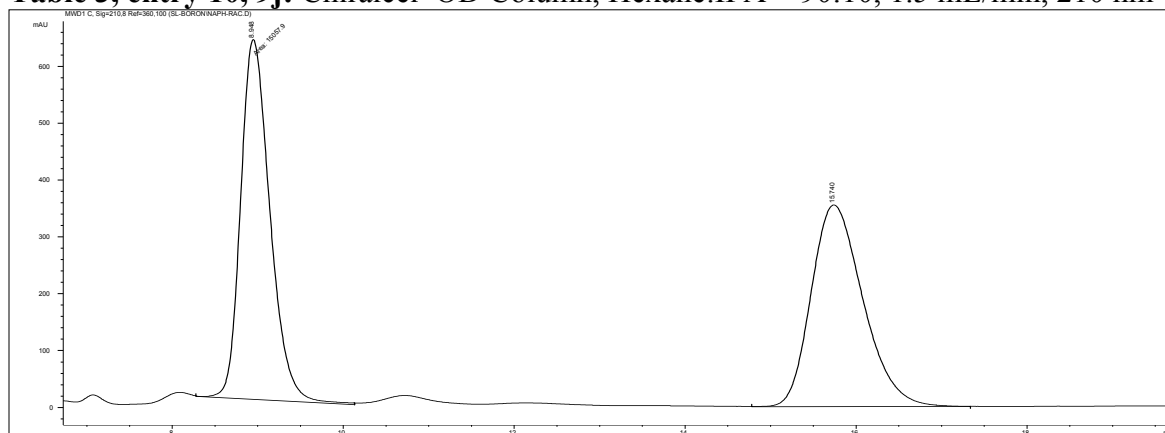

Ph signal 3: MWD1 C, Sig=210,8 Ref=360,100

| Peak #   | RetTime [min] | Type | Width [min] | Area [mAU*s] | Height [mAU] | Area %  |
|----------|---------------|------|-------------|--------------|--------------|---------|
| 1        | 8.948         | MM   | 0.3965      | 1.50579e4    | 632.92438    | 50.2528 |
| 2        | 15.740        | VV   | 0.6524      | 1.49064e4    | 354.61392    | 49.7472 |
| Totals : |               |      | 2.99643e4   | 987.53830    |              |         |

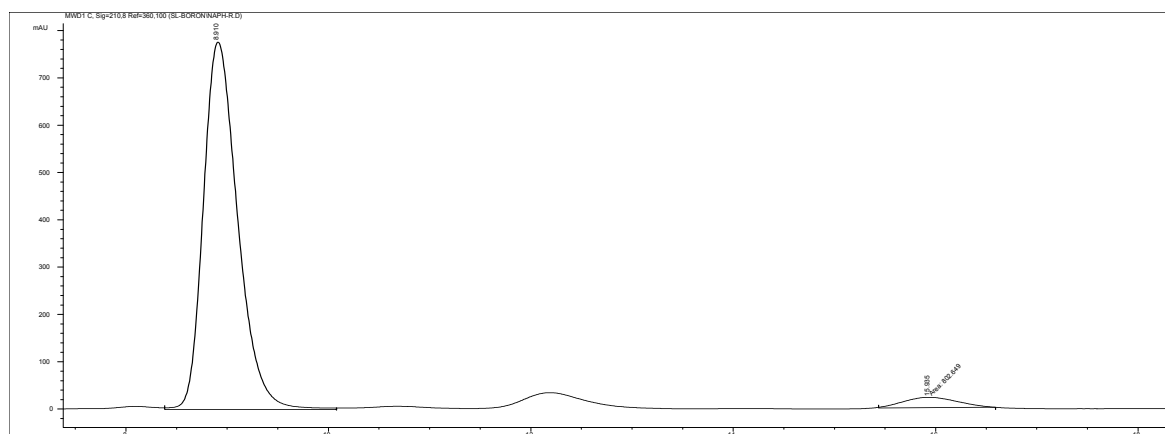

Ph signal 3: MWD1 C, Sig=210,8 Ref=360,100

| Peak #   | RetTime [min] | Type | Width [min] | Area [mAU*s] | Height [mAU] | Area %  |
|----------|---------------|------|-------------|--------------|--------------|---------|
| 1        | 8.910         | VB   | 0.3628      | 1.82864e4    | 776.43866    | 95.7952 |
| 2        | 15.935        | MM   | 0.6140      | 802.64948    | 21.78878     | 4.2048  |
| Totals : |               |      | 1.90891e4   | 798.22744    |              |         |

**Table 3, entry 11, 9k:** Chiralcel<sup>®</sup> OD Column, Hexane:IPA = 90:10, 1.5 mL/min, 210 nm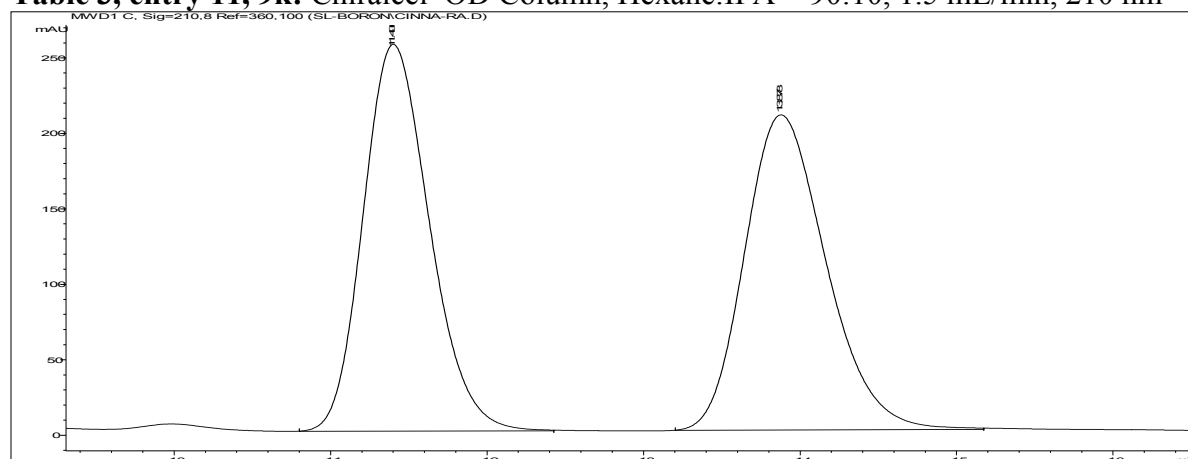

Signal 3: MWD1 C, Sig=210,8 Ref=360,100

| Peak #   | RetTime [min] | Type | Width [min] | Area [mAU*s] | Height [mAU] | Area %  |
|----------|---------------|------|-------------|--------------|--------------|---------|
| 1        | 11.400        | BB   | 0.4593      | 7543.50537   | 256.37012    | 49.9571 |
| 2        | 13.878        | BB   | 0.5621      | 7556.45703   | 208.87456    | 50.0429 |
| Totals : |               |      | 1.51000e4   | 465.24467    |              |         |

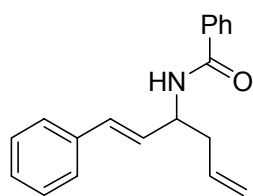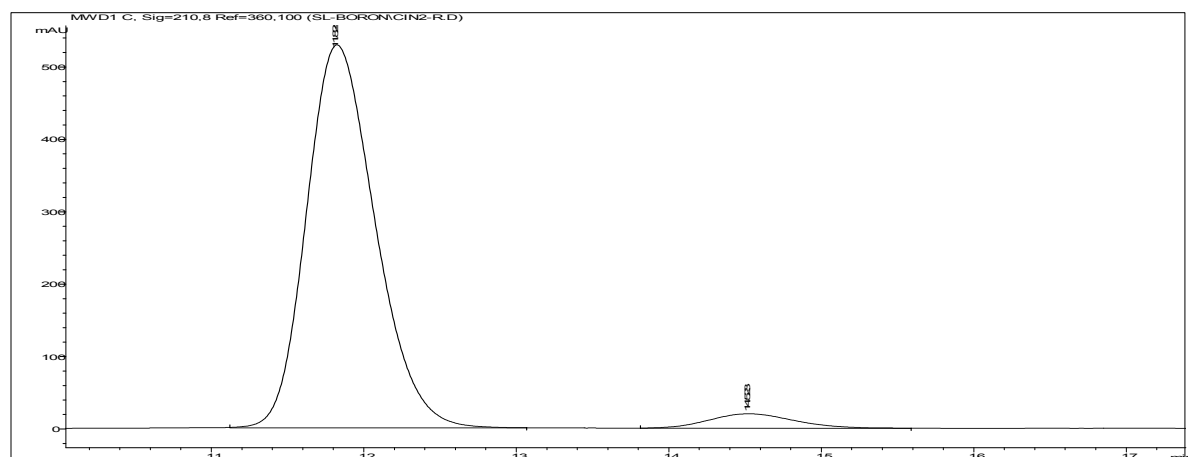

Signal 3: MWD1 C, Sig=210,8 Ref=360,100

| Peak #   | RetTime [min] | Type | Width [min] | Area [mAU*s] | Height [mAU] | Area %  |
|----------|---------------|------|-------------|--------------|--------------|---------|
| 1        | 11.824        | BB   | 0.4849      | 1.65499e4    | 529.06519    | 95.5603 |
| 2        | 14.523        | PB   | 0.5954      | 768.89362    | 19.87295     | 4.4397  |
| Totals : |               |      | 1.73188e4   | 548.93814    |              |         |

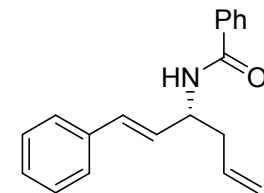

**Table 3, entry 12, 9l:** Chiralcel® OD Column, Hexane:IPA = 90:10, 1.5 mL/min, 210 nm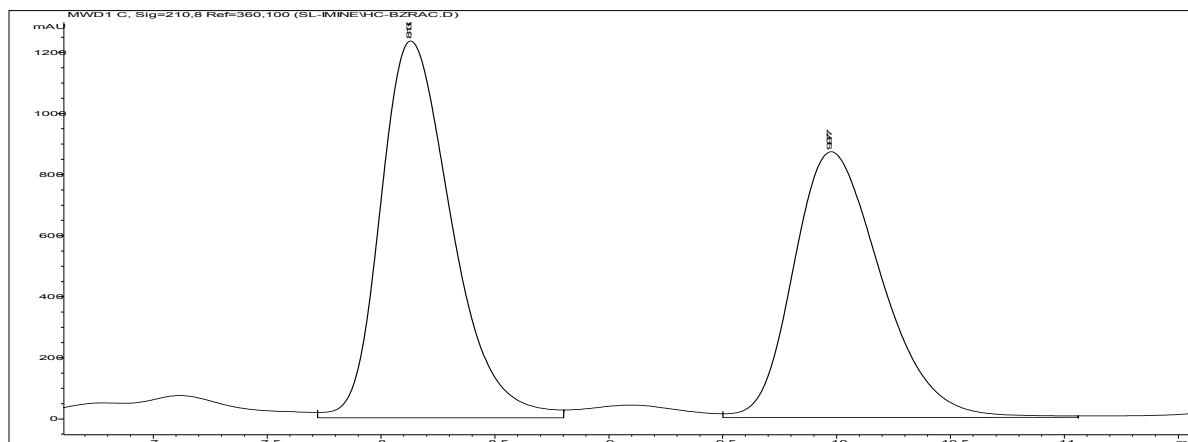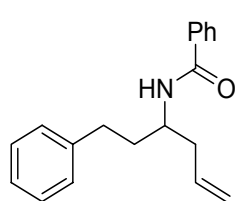

Signal 3: MWD1 C, Sig=210,8 Ref=360,100

| Peak #   | RetTime [min] | Type | Width [min] | Area [mAU*s] | Height [mAU] | Area %  |
|----------|---------------|------|-------------|--------------|--------------|---------|
| 1        | 8.130         | MM   | 0.3403      | 2.43939e4    | 1194.61963   | 51.1832 |
| 2        | 9.977         | VV   | 0.4158      | 2.32661e4    | 870.45038    | 48.8168 |
| Totals : |               |      |             | 4.76600e4    | 2065.07001   |         |

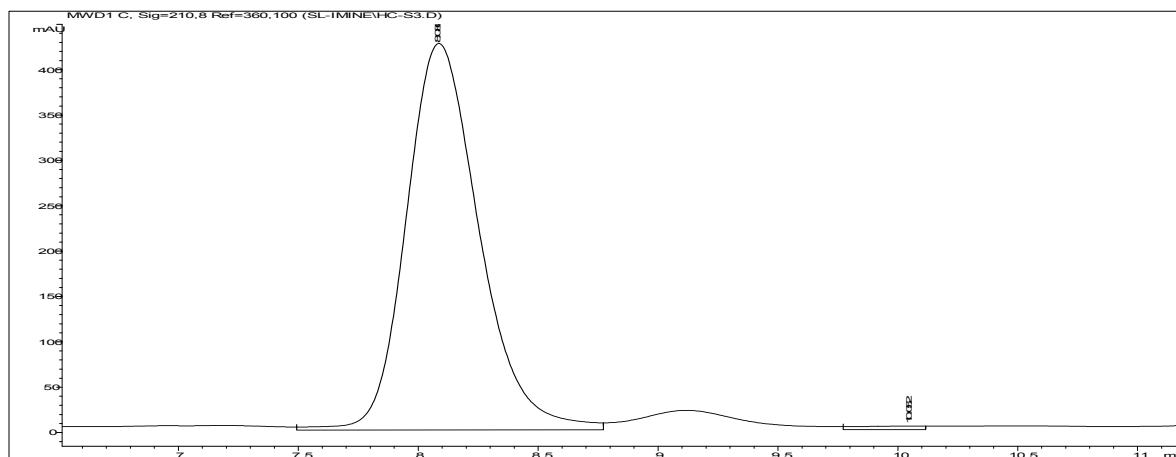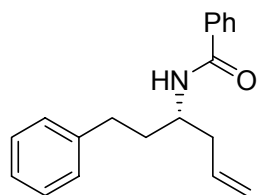

Signal 3: MWD1 C, Sig=210,8 Ref=360,100

| Peak #   | RetTime [min] | Type | Width [min] | Area [mAU*s] | Height [mAU] | Area %  |
|----------|---------------|------|-------------|--------------|--------------|---------|
| 1        | 8.086         | VV   | 0.3269      | 9018.47266   | 426.07907    | 99.1914 |
| 2        | 10.052        | VV   | 0.2338      | 73.51500     | 3.83194      | 0.8086  |
| Totals : |               |      |             | 9091.98766   | 429.91101    |         |

**Table 3, entry 13, 9m:** Chiralpak® AD-H Column, Hexane:IPA = 90:10, 1.0 mL/min, 210 nm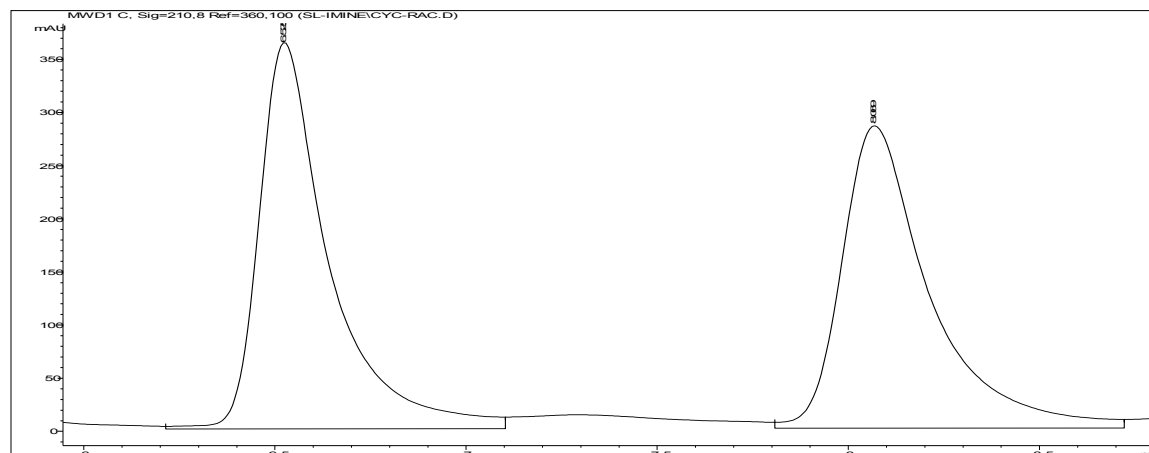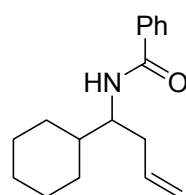

Signal 3: MWD1 C, Sig=210,8 Ref=360,100

| Peak #   | RetTime [min] | Type | Width [min] | Area [mAU*s] | Height [mAU] | Area %  |
|----------|---------------|------|-------------|--------------|--------------|---------|
| 1        | 6.525         | VV   | 0.1865      | 4628.27344   | 363.57437    | 50.4718 |
| 2        | 8.069         | VV   | 0.2341      | 4541.74854   | 284.74835    | 49.5282 |
| Totals : |               |      | 9170.02197  | 648.32272    |              |         |

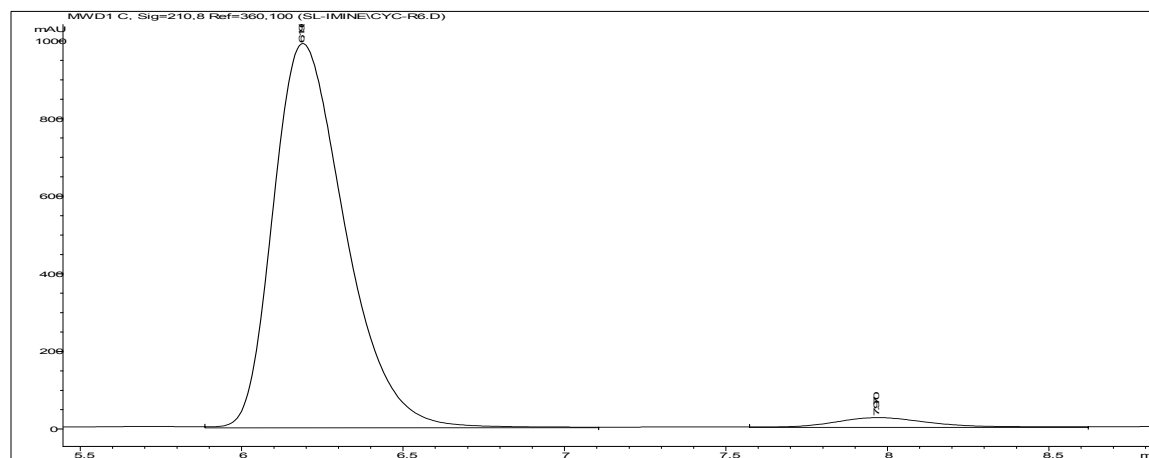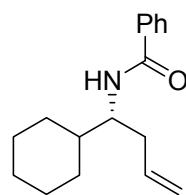

Signal 3: MWD1 C, Sig=210,8 Ref=360,100

| Peak #   | RetTime [min] | Type | Width [min] | Area [mAU*s] | Height [mAU] | Area %  |
|----------|---------------|------|-------------|--------------|--------------|---------|
| 1        | 6.190         | VB   | 0.2385      | 1.53226e4    | 990.24982    | 98.0187 |
| 2        | 7.970         | MM   | 0.2562      | 309.72220    | 20.14779     | 1.9813  |
| Totals : |               |      | 1.56323e4   | 1010.39761   |              |         |

**Table 3, entry 14, 9n:** Chiralpak® AD-H Column, Hexane:IPA = 90:10, 1.0 mL/min, 210 nm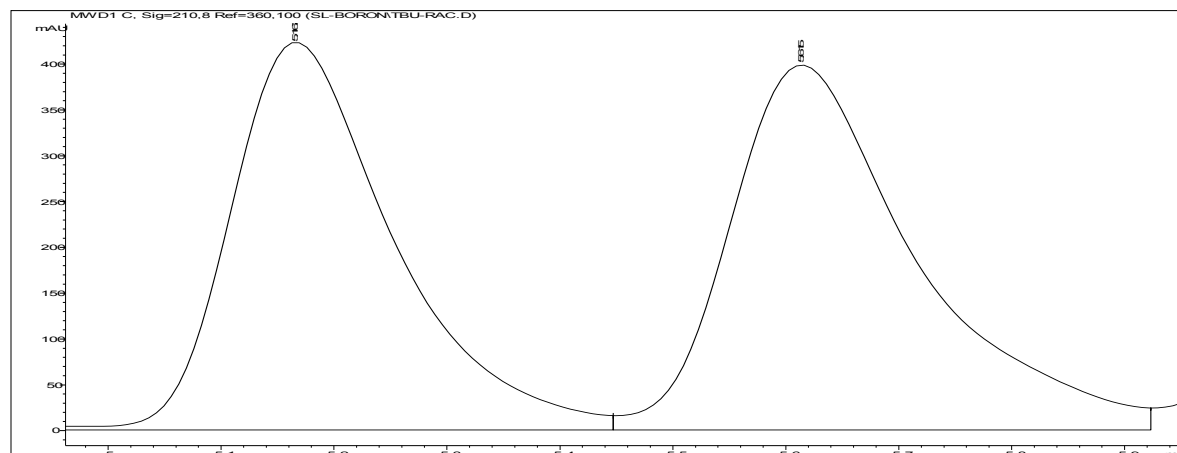

Ph Signal 3: MWD1 C, Sig=210,8 Ref=360,100

| Peak #   | RetTime [min] | Type | Width [min] | Area [mAU*s] | Height [mAU] | Area %  |
|----------|---------------|------|-------------|--------------|--------------|---------|
| 1        | 5.167         | VV   | 0.1496      | 4252.20557   | 421.85791    | 48.2876 |
| 2        | 5.615         | VV   | 0.1695      | 4553.79346   | 397.94125    | 51.7124 |
| Totals : |               |      | 8805.99902  | 819.79916    |              |         |

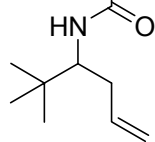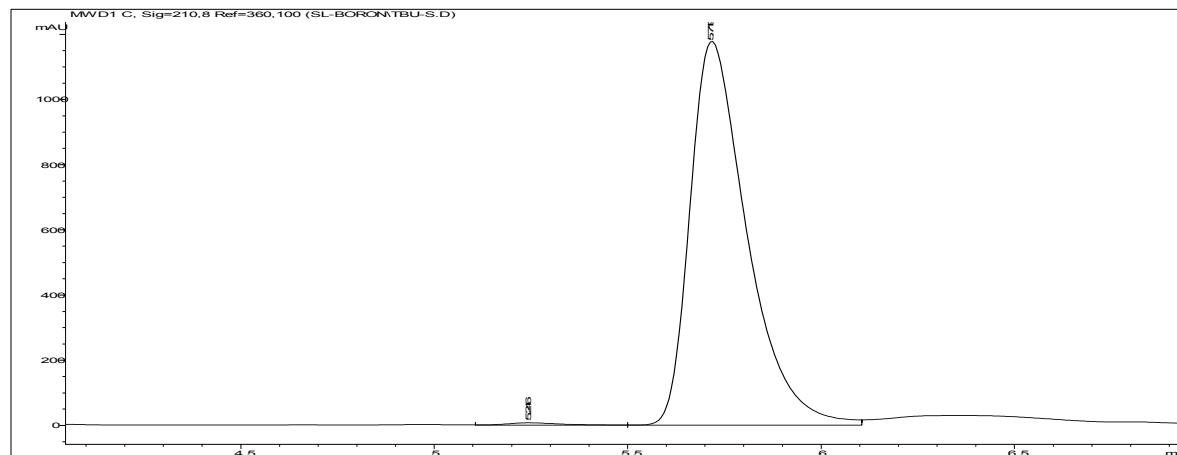

Ph Signal 3: MWD1 C, Sig=210,8 Ref=360,100

| Peak #   | RetTime [min] | Type | Width [min] | Area [mAU*s] | Height [mAU] | Area %  |
|----------|---------------|------|-------------|--------------|--------------|---------|
| 1        | 5.246         | VV   | 0.1558      | 81.01602     | 7.63209      | 0.6673  |
| 2        | 5.719         | VV   | 0.1555      | 1.20596e4    | 1177.41174   | 99.3327 |
| Totals : |               |      | 1.21406e4   | 1185.04383   |              |         |

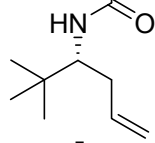

**Table 1, entry 15, 9o:** Whelk-O Column, Hexane:IPA = 90:10, 1.0 mL/min, 210 nm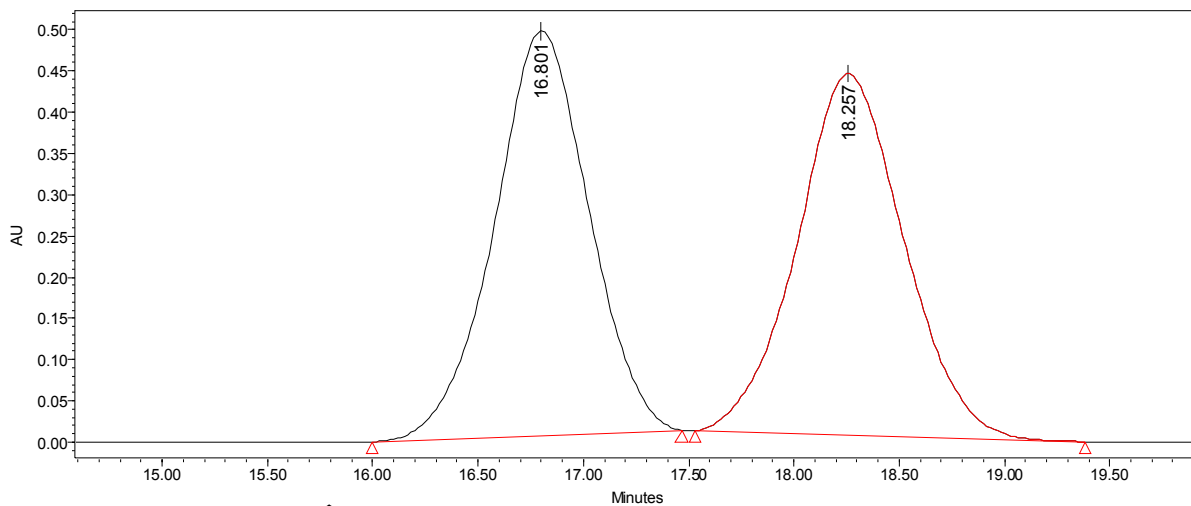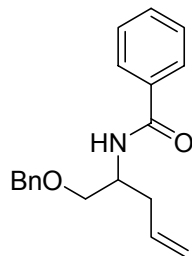

|   | Retention Time | Area      | % Area |
|---|----------------|-----------|--------|
| 1 | 16.772         | 118659504 | 48.31  |
| 2 | 18.272         | 126978155 | 51.69  |

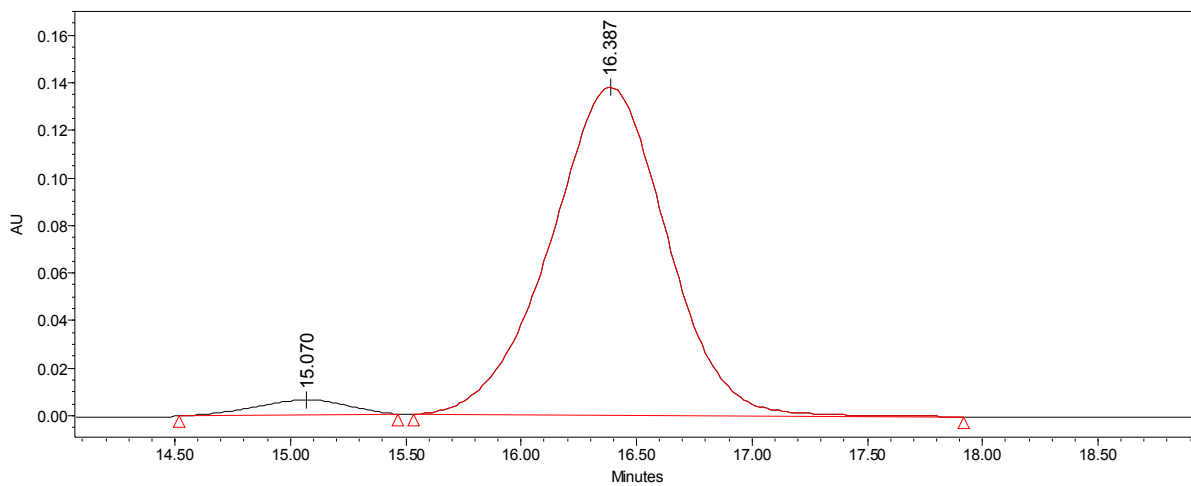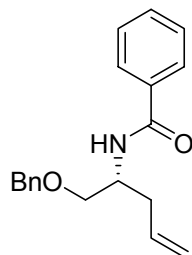

|   | Retention Time | Area    | % Area |
|---|----------------|---------|--------|
| 1 | 15.070         | 177464  | 3.54   |
| 2 | 16.387         | 4838350 | 96.46  |

**Table 1, entry 16, 9p:** Chiralcel<sup>®</sup>OD Column, Hexane:IPA = 93:7, 1.0 mL/min, 254 nm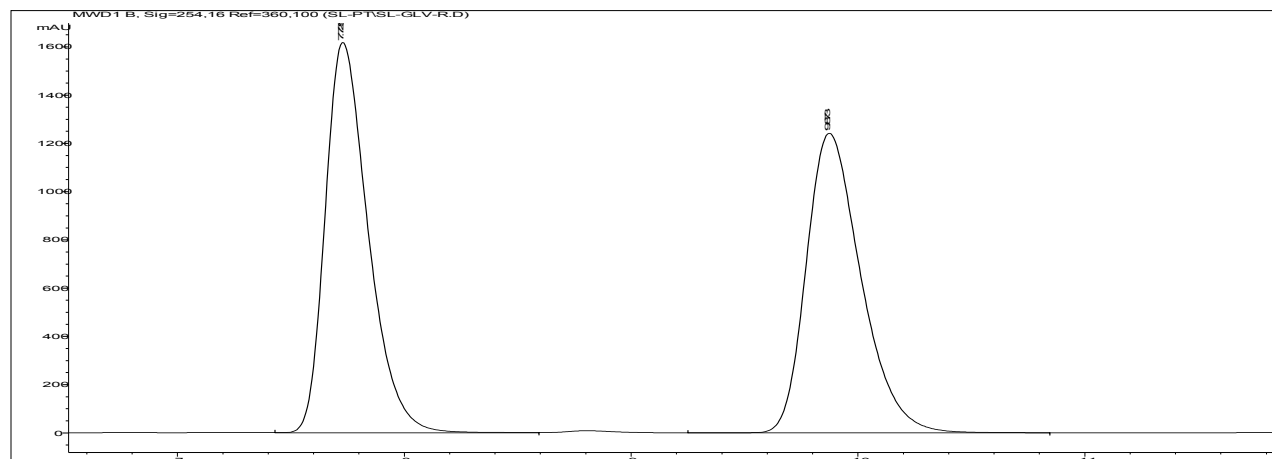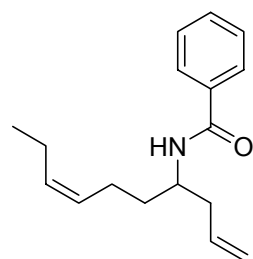

Signal 2: MWD1 B, Sig=254,16 Ref=360,100

| Peak #   | RetTime [min] | Type | Width [min] | Area [mAU*s] | Height [mAU] | Area %  |
|----------|---------------|------|-------------|--------------|--------------|---------|
| 1        | 7.729         | VV   | 0.2019      | 2.13518e4    | 1619.07935   | 50.6710 |
| 2        | 9.873         | VB   | 0.2573      | 2.07862e4    | 1241.97949   | 49.3290 |
| Totals : |               |      |             | 4.21380e4    | 2861.05884   |         |

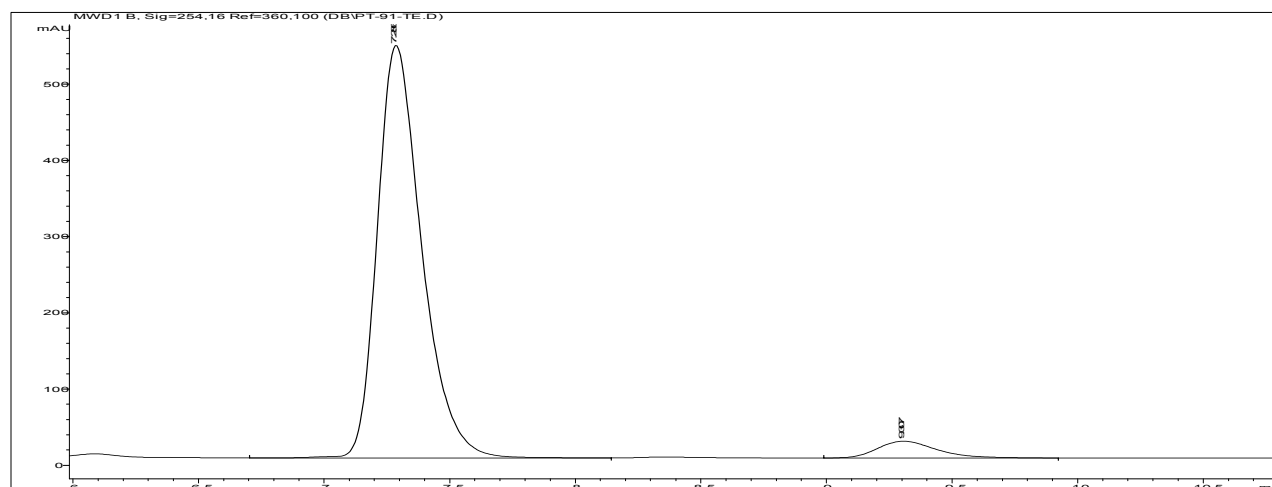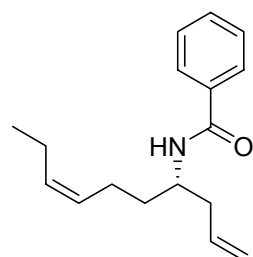

Signal 2: MWD1 B, Sig=254,16 Ref=360,100

| Peak #   | RetTime [min] | Type | Width [min] | Area [mAU*s] | Height [mAU] | Area %  |
|----------|---------------|------|-------------|--------------|--------------|---------|
| 1        | 7.286         | BB   | 0.1875      | 6663.55762   | 541.82336    | 95.6928 |
| 2        | 9.307         | MM   | 0.2394      | 299.93033    | 20.87802     | 4.3072  |
| Totals : |               |      |             | 6963.48795   | 562.70138    |         |

**Table 4, entry 5, 11e:** Chiralcel<sup>®</sup> OD Column, Hexane:IPA = 90:10, 1.5 mL/min, 210 nm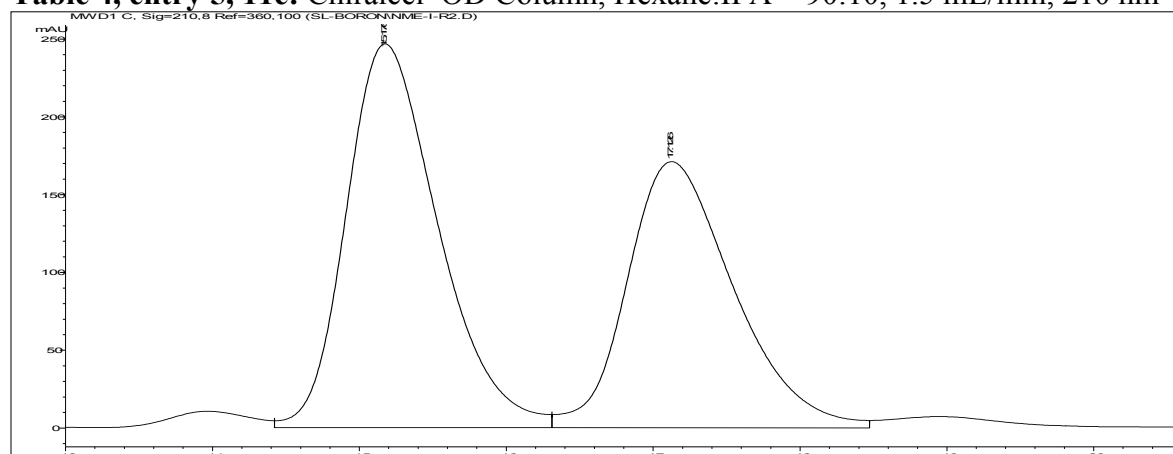N(CH<sub>3</sub>)<sub>2</sub> Signal 3: MWD1 C, Sig=210,8 Ref=360,100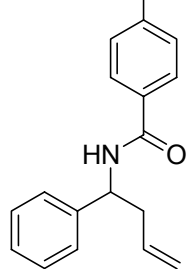

| Peak #   | RetTime [min] | Type | Width [min] | Area [mAU*s] | Height [mAU] | Area %  |
|----------|---------------|------|-------------|--------------|--------------|---------|
| 1        | 15.175        | MM   | 0.6510      | 9025.19531   | 231.05045    | 50.9743 |
| 2        | 17.128        | MM   | 0.8693      | 8680.18750   | 166.42128    | 49.0257 |
| Totals : |               |      |             | 1.77054e4    | 397.47173    |         |

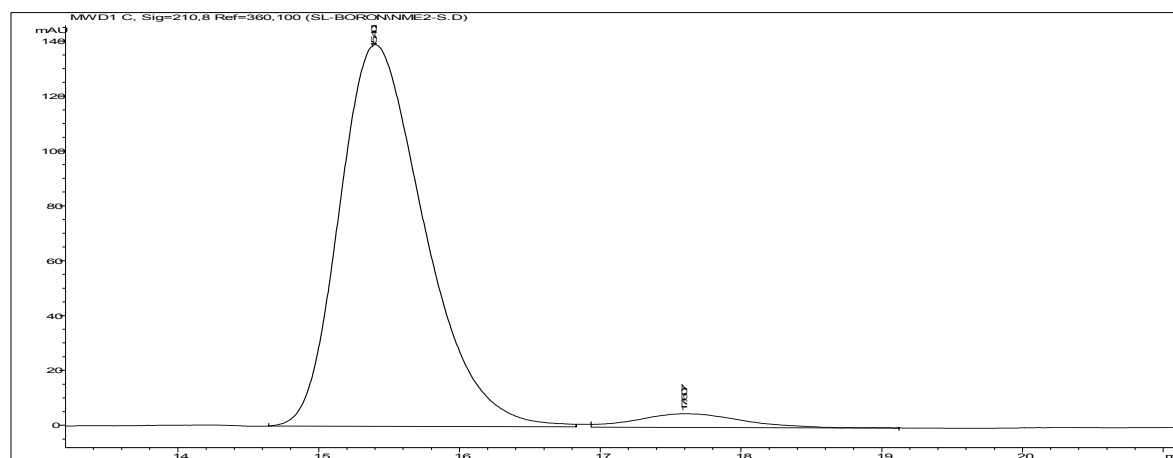N(CH<sub>3</sub>)<sub>2</sub> Signal 3: MWD1 C, Sig=210,8 Ref=360,100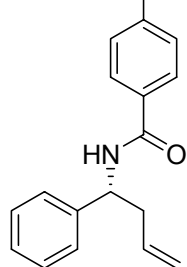

| Peak #   | RetTime [min] | Type | Width [min] | Area [mAU*s] | Height [mAU] | Area %  |
|----------|---------------|------|-------------|--------------|--------------|---------|
| 1        | 15.402        | PB   | 0.6493      | 5832.73828   | 139.07399    | 97.0419 |
| 2        | 17.616        | MM   | 0.7079      | 177.79588    | 4.18622      | 2.9581  |
| Totals : |               |      |             | 6010.53416   | 143.26021    |         |



**Table 4, entry 6, 11f:** Chiralcel® OD Column, Hexane:IPA = 90:10, 1.5 mL/min, 210 nm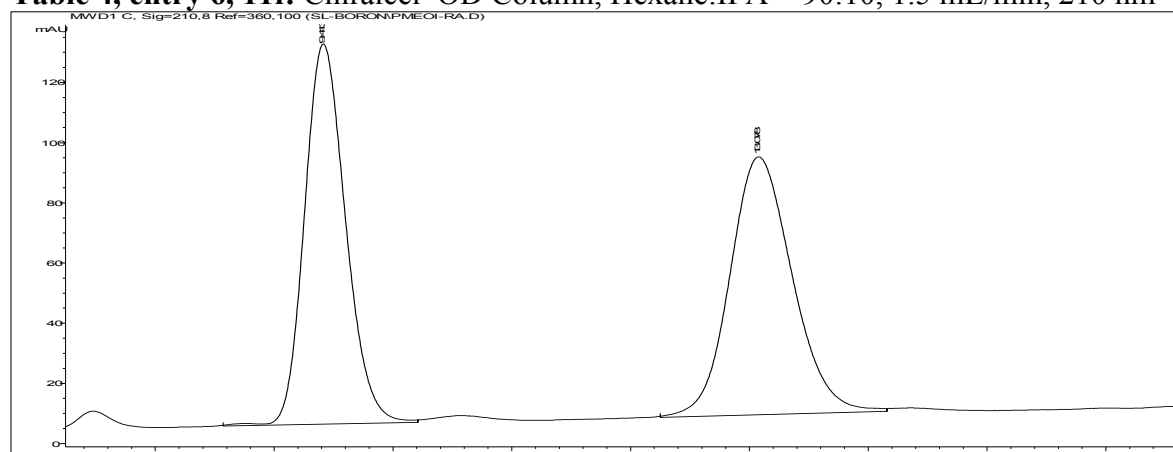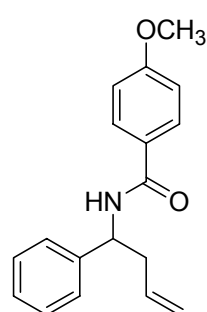

Signal 3: MWD1 C, Sig=210,8 Ref=360,100

| Peak #   | RetTime [min] | Type | Width [min] | Area [mAU*s] | Height [mAU] | Area %  |
|----------|---------------|------|-------------|--------------|--------------|---------|
| 1        | 9.413         | BB   | 0.3727      | 3041.27539   | 126.38237    | 49.3494 |
| 2        | 13.078        | BB   | 0.5690      | 3121.46973   | 85.69199     | 50.6506 |
| Totals : |               |      |             | 6162.74512   | 212.07436    |         |

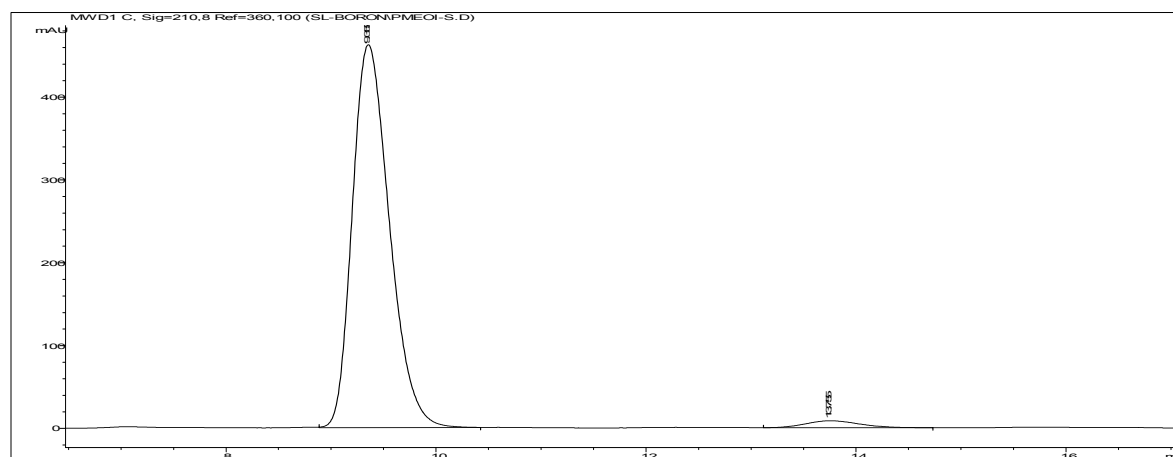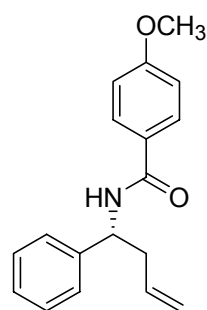

Signal 3: MWD1 C, Sig=210,8 Ref=360,100

| Peak #   | RetTime [min] | Type | Width [min] | Area [mAU*s] | Height [mAU] | Area %  |
|----------|---------------|------|-------------|--------------|--------------|---------|
| 1        | 9.355         | BB   | 0.3864      | 1.13482e4    | 462.30347    | 97.4545 |
| 2        | 13.755        | PB   | 0.5316      | 296.41287    | 8.40224      | 2.5455  |
| Totals : |               |      |             | 1.16446e4    | 470.70571    |         |

**Table 4, entry 7, 11g:** Chiralcel<sup>®</sup>OD Column, Hexane:IPA = 90:10, 1.5 mL/min, 210 nm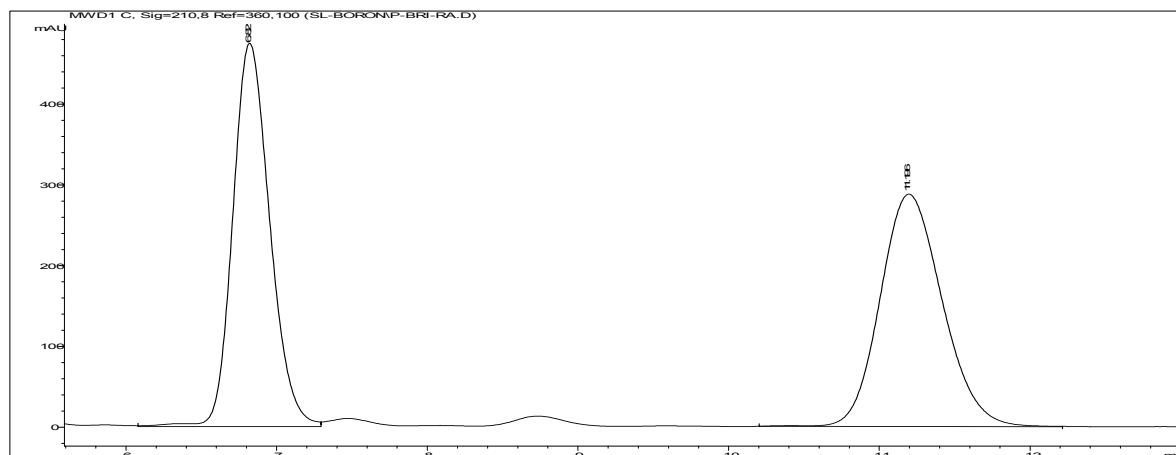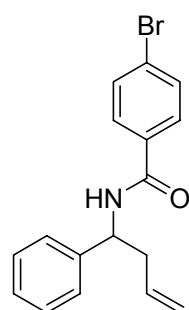

Signal 3: MWD1 C, Sig=210,8 Ref=360,100

| Peak #   | RetTime [min] | Type | Width [min] | Area [mAU*s] | Height [mAU] | Area %  |
|----------|---------------|------|-------------|--------------|--------------|---------|
| 1        | 6.821         | VV   | 0.2633      | 8104.41797   | 474.46976    | 49.6084 |
| 2        | 11.196        | BB   | 0.4460      | 8232.35840   | 287.59470    | 50.3916 |
| Totals : |               |      |             | 1.63368e4    | 762.06445    |         |

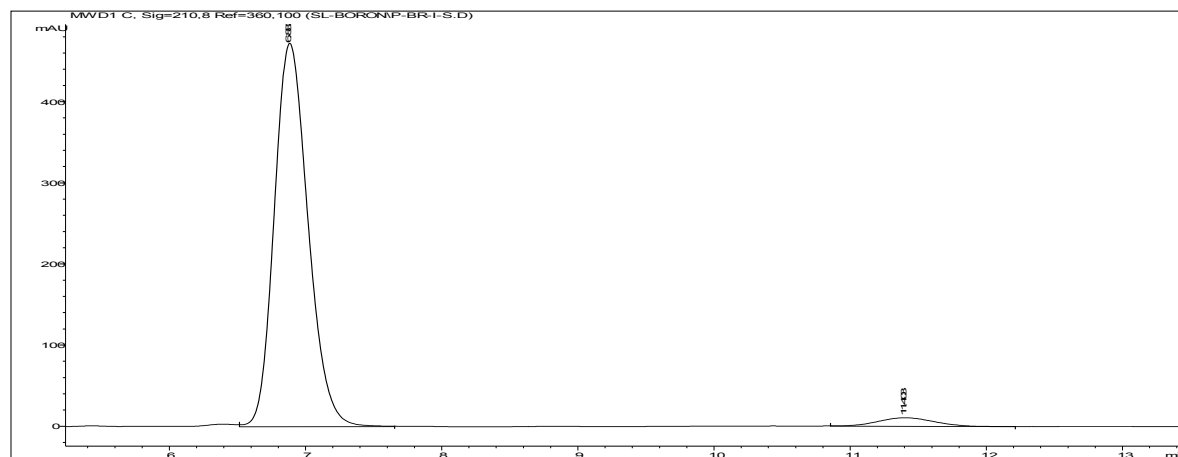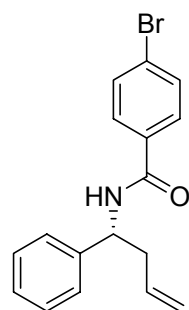

Signal 3: MWD1 C, Sig=210,8 Ref=360,100

| Peak #   | RetTime [min] | Type | Width [min] | Area [mAU*s] | Height [mAU] | Area %  |
|----------|---------------|------|-------------|--------------|--------------|---------|
| 1        | 6.883         | VB   | 0.2682      | 8107.33740   | 472.40405    | 96.4968 |
| 2        | 11.403        | BP   | 0.4471      | 294.32919    | 10.49914     | 3.5032  |
| Totals : |               |      |             | 8401.66660   | 482.90319    |         |

**Table 4, entry 8, 11h:** Chiralcel® OD Column, Hexane:IPA = 90:10, 1.5 mL/min, 210 nm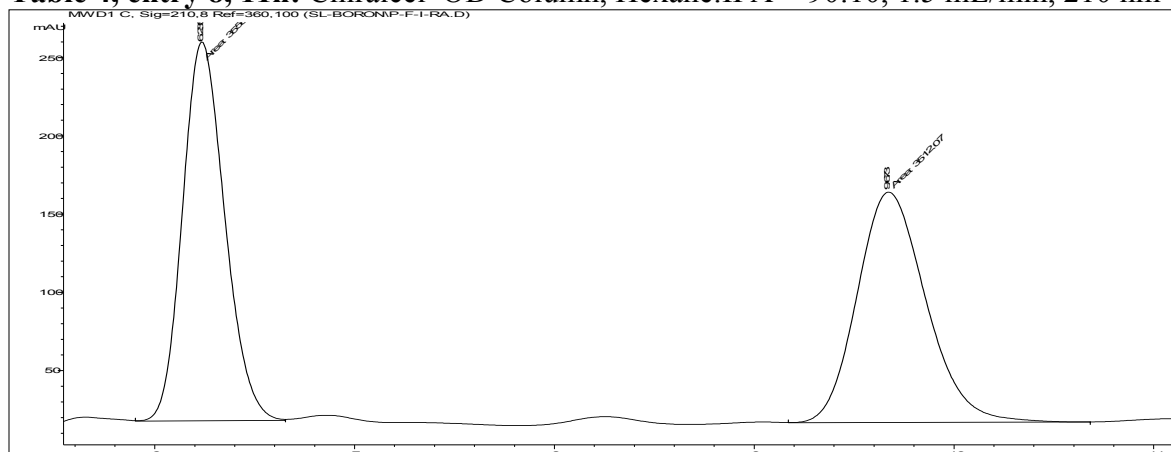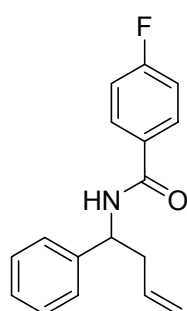

Signal 3: MWD1 C, Sig=210,8 Ref=360,100

| Peak #   | RetTime [min] | Type | Width [min] | Area [mAU*s] | Height [mAU] | Area %  |
|----------|---------------|------|-------------|--------------|--------------|---------|
| 1        | 6.235         | MM   | 0.2447      | 3558.54980   | 242.36360    | 50.3287 |
| 2        | 9.673         | MM   | 0.3975      | 3512.07056   | 147.26648    | 49.6713 |
| Totals : |               |      |             | 7070.62036   | 389.63008    |         |

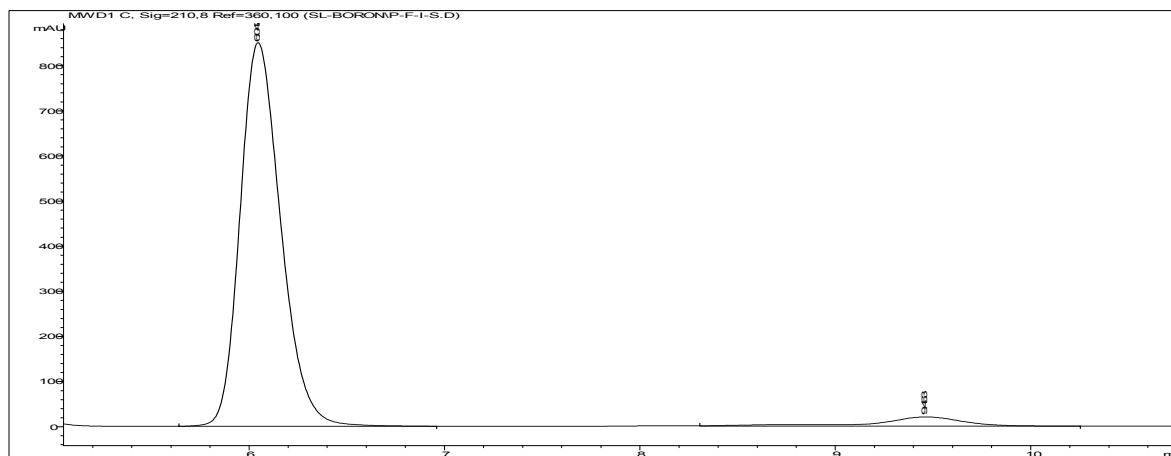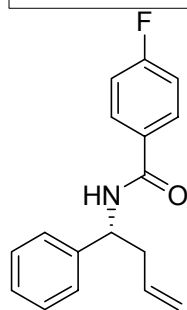

Signal 3: MWD1 C, Sig=210,8 Ref=360,100

| Peak #   | RetTime [min] | Type | Width [min] | Area [mAU*s] | Height [mAU] | Area %  |
|----------|---------------|------|-------------|--------------|--------------|---------|
| 1        | 6.047         | BB   | 0.2248      | 1.22970e4    | 849.98114    | 97.3474 |
| 2        | 9.462         | MM   | 0.3338      | 335.07645    | 16.73082     | 2.6526  |
| Totals : |               |      |             | 1.26321e4    | 866.71196    |         |

**Table 4, entry 9, 11i:** Chiralcel® OD Column, Hexane:IPA = 90:10, 1.5 mL/min, 280 nm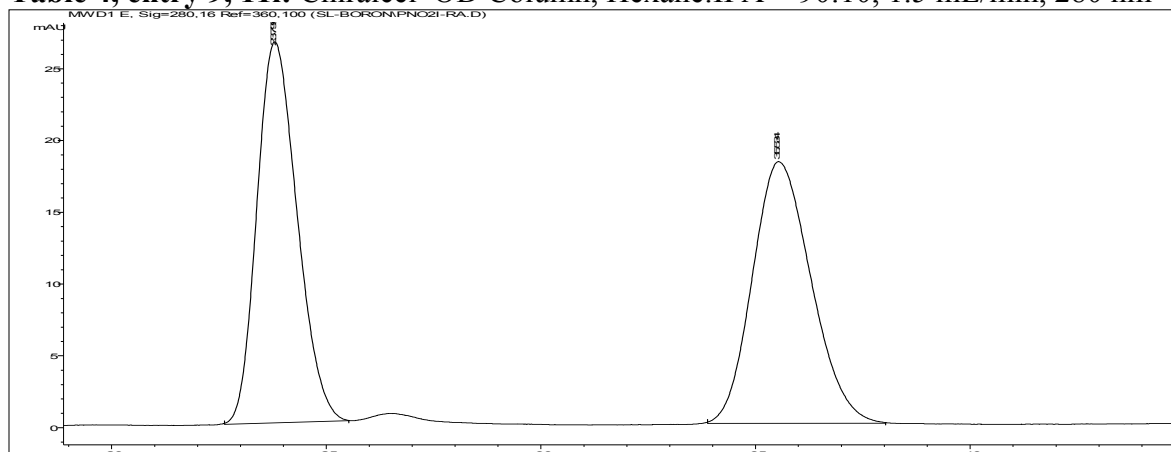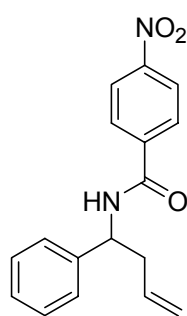

Signal 5: MWD1 E, Sig=280,16 Ref=360,100

| Peak #   | RetTime [min] | Type | Width [min] | Area [mAU*s] | Height [mAU] | Area %  |
|----------|---------------|------|-------------|--------------|--------------|---------|
| 1        | 23.799        | BB   | 0.9715      | 1727.40979   | 26.53513     | 49.9640 |
| 2        | 35.534        | BB   | 1.3090      | 1729.89868   | 18.23099     | 50.0360 |
| Totals : |               |      |             | 3457.30847   | 44.76612     |         |

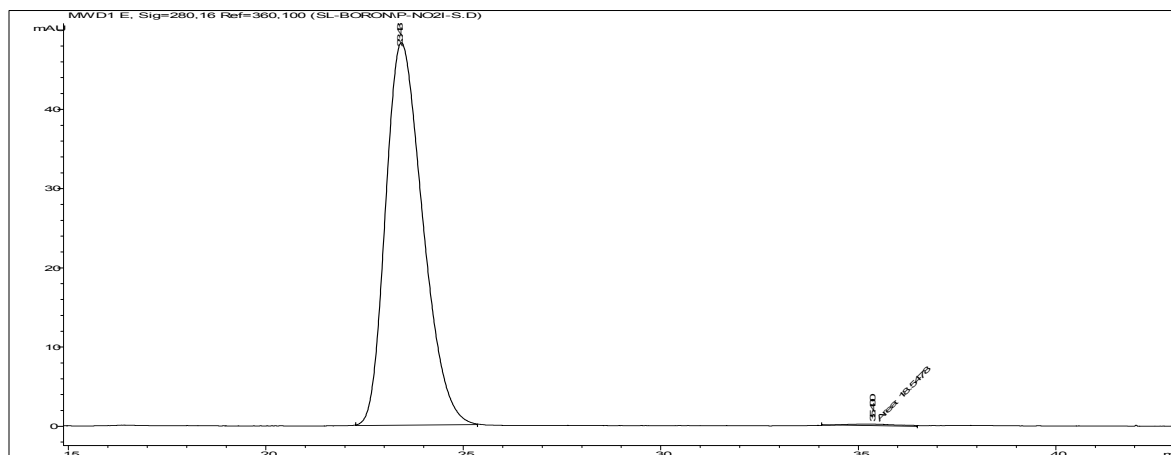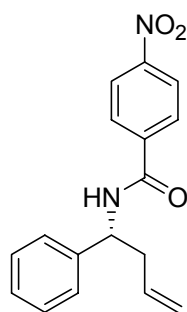

Signal 5: MWD1 E, Sig=280,16 Ref=360,100

| Peak #   | RetTime [min] | Type | Width [min] | Area [mAU*s] | Height [mAU] | Area %  |
|----------|---------------|------|-------------|--------------|--------------|---------|
| 1        | 23.431        | MM   | 1.0986      | 3192.77124   | 48.43779     | 99.4224 |
| 2        | 35.400        | MM   | 1.4983      | 18.54776     | 2.06324e-1   | 0.5776  |
| Totals : |               |      |             | 3211.31900   | 48.64411     |         |

**Table 4, entry 11, 11k:** Chiralcel<sup>®</sup> OD Column, Hexane:IPA = 90:10, 1.5 mL/min, 280 nm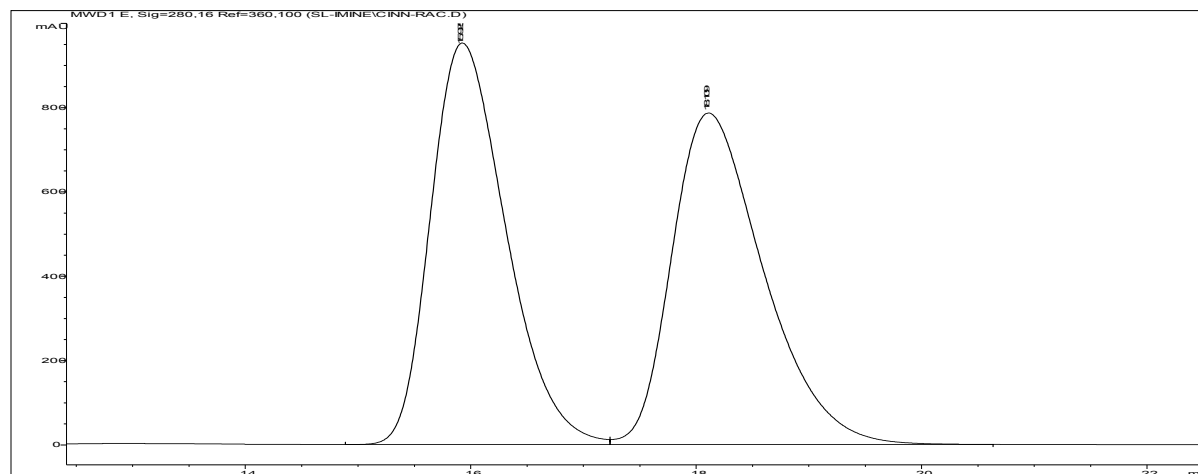

Ph Signal 5: MWD1 E, Sig=280,16 Ref=360,100

| Peak #   | RetTime [min] | Type | Width [min] | Area [mAU*s] | Height [mAU] | Area %  |
|----------|---------------|------|-------------|--------------|--------------|---------|
| 1        | 15.925        | VV   | 0.7265      | 4.42925e4    | 952.51953    | 49.9294 |
| 2        | 18.109        | VB   | 0.8691      | 4.44176e4    | 786.24426    | 50.0706 |
| Totals : |               |      |             | 8.87101e4    | 1738.76379   |         |

Chemical structure: C=CC(C(=O)Nc1ccccc1)C=C

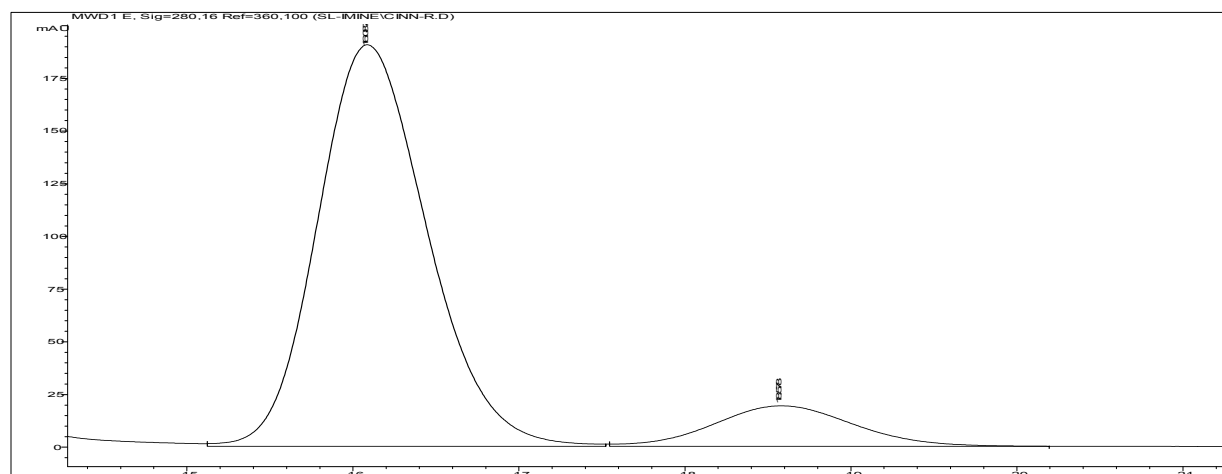

Ph Signal 5: MWD1 E, Sig=280,16 Ref=360,100

| Peak #   | RetTime [min] | Type | Width [min] | Area [mAU*s] | Height [mAU] | Area %  |
|----------|---------------|------|-------------|--------------|--------------|---------|
| 1        | 16.087        | BB   | 0.7177      | 8750.56445   | 190.56987    | 94.8152 |
| 2        | 18.578        | MM   | 0.6510      | 478.50510    | 12.25049     | 5.1848  |
| Totals : |               |      |             | 9229.06955   | 202.82036    |         |

Chemical structure: C=CC(C(=O)Nc1ccccc1)C=C

**Table 4, entry 12, 11:** Chiralcel<sup>®</sup> AD Column, Hexane:IPA = 90:10, 1.5 mL/min, 250 nm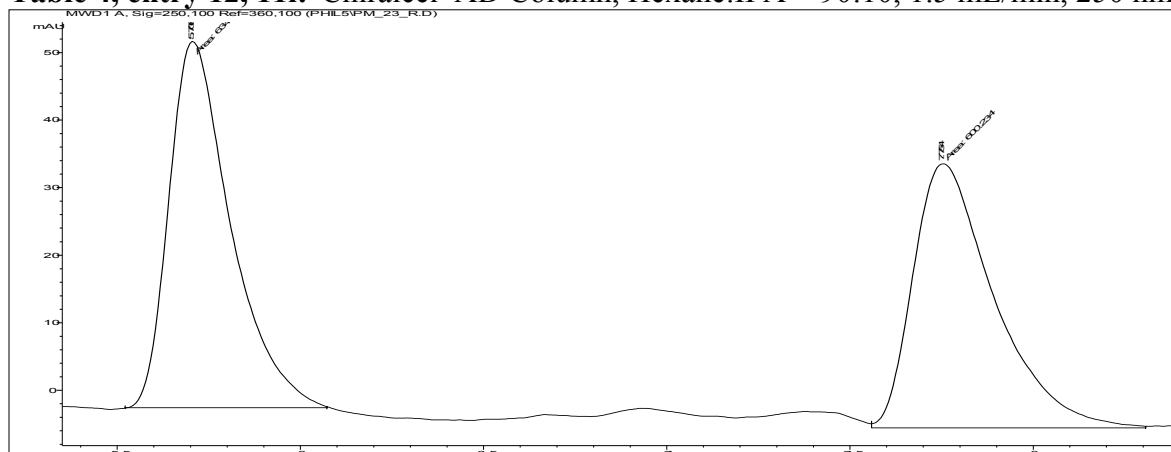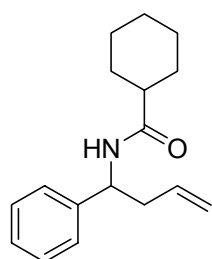

Signal 1: MWD1 A, Sig=250,100 Ref=360,100

| Peak #   | RetTime [min] | Type | Width [min] | Area [mAU*s] | Height [mAU] | Area %  |
|----------|---------------|------|-------------|--------------|--------------|---------|
| 1        | 5.706         | MM   | 0.1947      | 634.17957    | 54.28231     | 51.3750 |
| 2        | 7.754         | MM   | 0.2556      | 600.23358    | 39.14606     | 48.6250 |
| Totals : |               |      |             | 1234.41315   | 93.42837     |         |

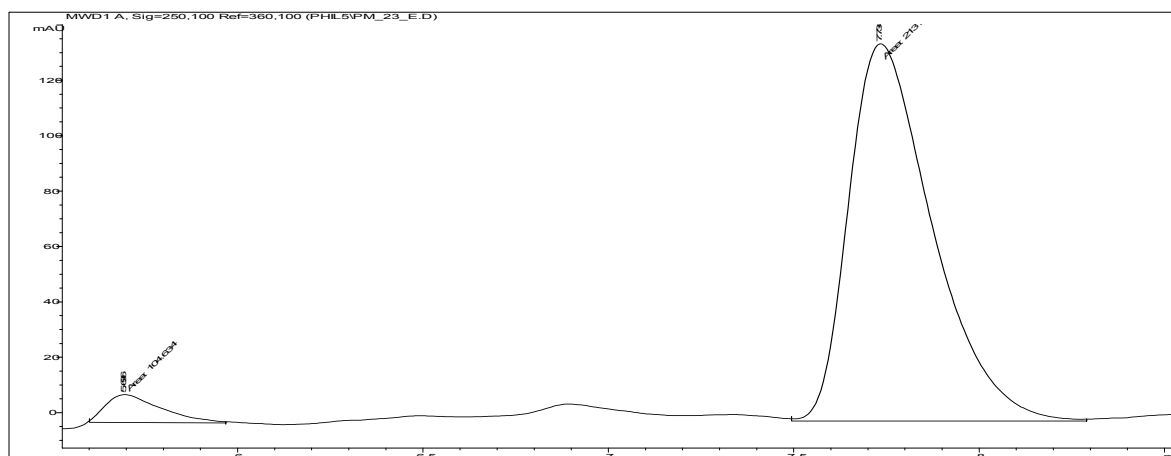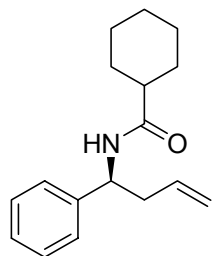

Signal 1: MWD1 A, Sig=250,100 Ref=360,100

| Peak #   | RetTime [min] | Type | Width [min] | Area [mAU*s] | Height [mAU] | Area %  |
|----------|---------------|------|-------------|--------------|--------------|---------|
| 1        | 5.696         | MM   | 0.1737      | 104.63435    | 10.04069     | 4.6798  |
| 2        | 7.734         | MM   | 0.2607      | 2131.21753   | 136.25139    | 95.3202 |
| Totals : |               |      |             | 2235.85188   | 146.29208    |         |

**Scheme 1, Compound 14:** Chiralcel<sup>®</sup> OD Column, Hexane:IPA = 90:10, 1.5 mL/min, 210 nm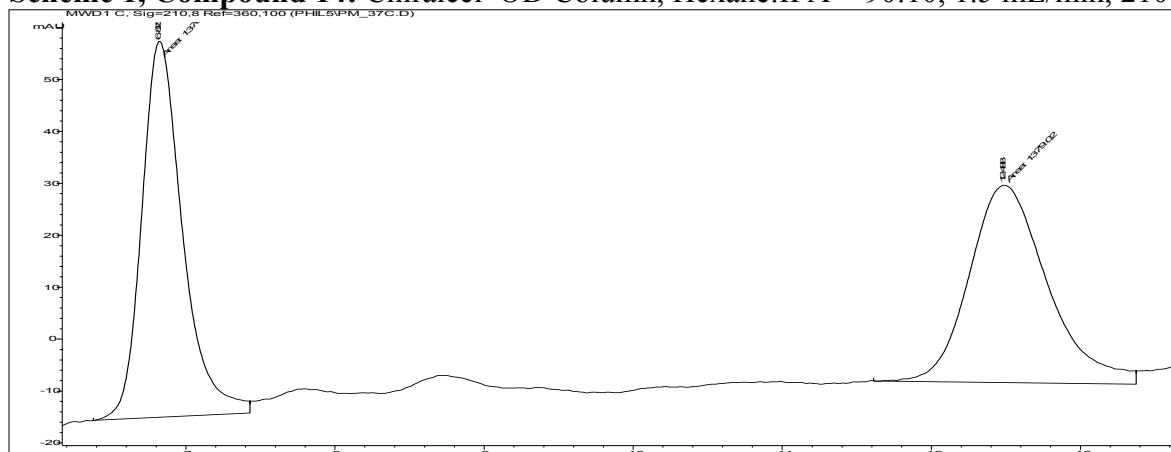

Signal 3: MWD1 C, Sig=210,8 Ref=360,100

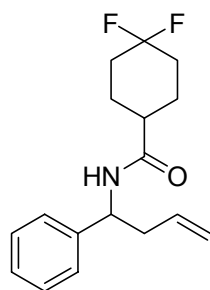

| Peak #   | RetTime [min] | Type | Width [min] | Area [mAU*s] | Height [mAU] | Area %  |
|----------|---------------|------|-------------|--------------|--------------|---------|
| 1        | 6.823         | MM   | 0.3166      | 1376.05200   | 72.44801     | 49.9461 |
| 2        | 12.488        | MM   | 0.6051      | 1379.02100   | 37.98329     | 50.0539 |
| Totals : |               |      |             | 2755.07300   | 110.43130    |         |

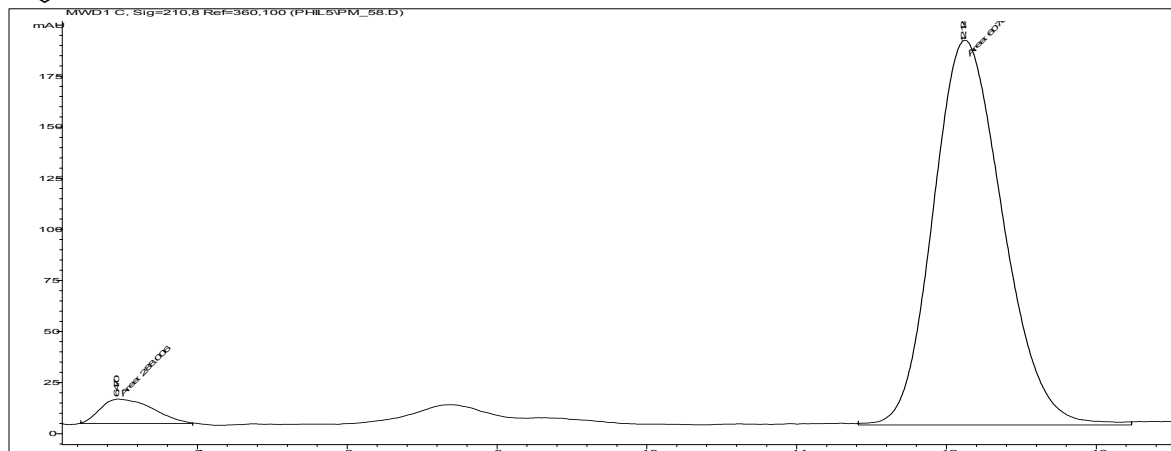

Signal 3: MWD1 C, Sig=210,8 Ref=360,100

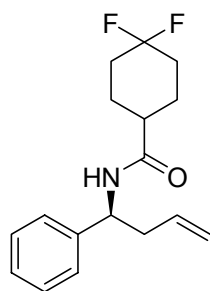

| Peak #   | RetTime [min] | Type | Width [min] | Area [mAU*s] | Height [mAU] | Area %  |
|----------|---------------|------|-------------|--------------|--------------|---------|
| 1        | 6.470         | MM   | 0.4032      | 288.00626    | 11.90623     | 4.5251  |
| 2        | 12.124        | MM   | 0.5378      | 6076.65088   | 188.31277    | 95.4749 |
| Totals : |               |      |             | 6364.65714   | 200.21901    |         |

**Scheme 2, Compound 19:** Chiralcel® OD Column, Hexane:IPA = 99:1, 1.5 mL/min, 230 nm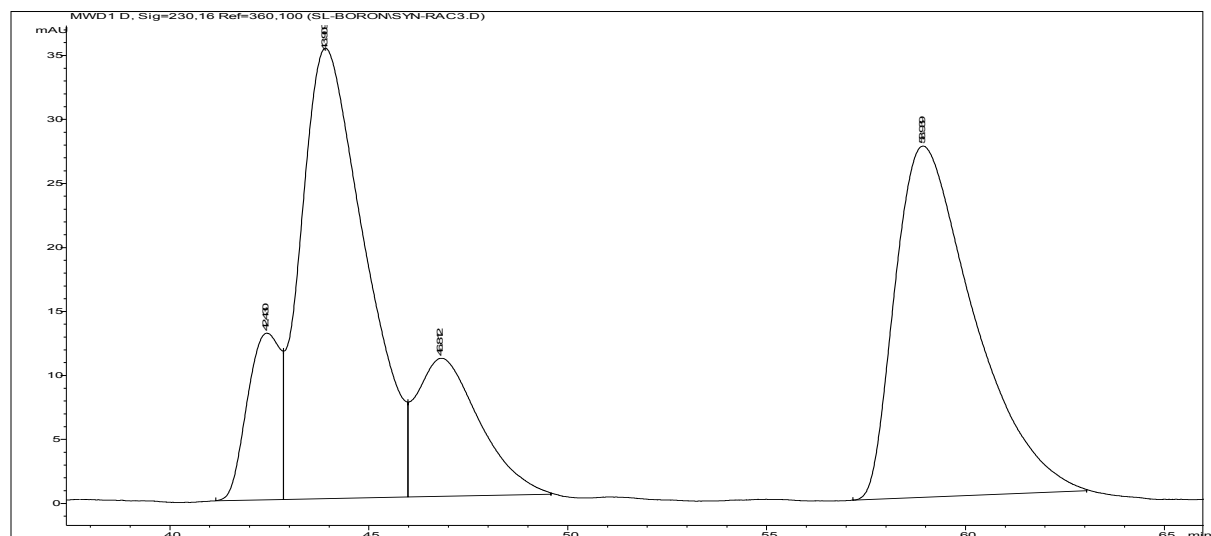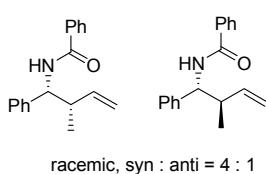

Signal 4: MWD1 D, Sig=230,16 Ref=360,100

| Peak #   | RetTime [min] | Type | Width [min] | Area [mAU*s] | Height [mAU] | Area %  |
|----------|---------------|------|-------------|--------------|--------------|---------|
| 1        | 42.430        | MF   | 1.0882      | 861.21063    | 13.18984     | 8.5737  |
| 2        | 43.909        | MF   | 1.8889      | 4014.67285   | 35.42271     | 39.9676 |
| 3        | 46.812        | FM   | 1.8248      | 1219.63477   | 11.13960     | 12.1419 |
| 4        | 58.939        | MM   | 2.3774      | 3949.30029   | 27.68599     | 39.3168 |
| Totals : |               |      |             | 1.00448e4    | 87.43814     |         |

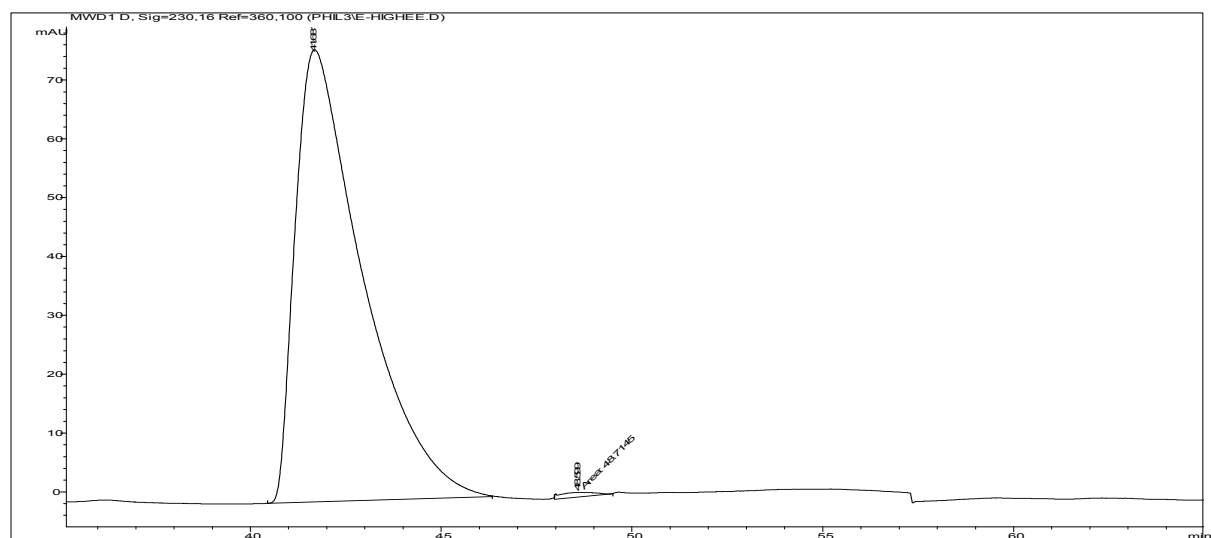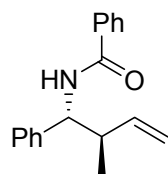

Signal 4: MWD1 D, Sig=230,16 Ref=360,100

| Peak #   | RetTime [min] | Type | Width [min] | Area [mAU*s] | Height [mAU] | Area %  |
|----------|---------------|------|-------------|--------------|--------------|---------|
| 1        | 41.681        | PB   | 1.6843      | 9424.14355   | 76.86837     | 99.4857 |
| 2        | 48.599        | MM   | 1.0670      | 48.71445     | 7.60893e-1   | 0.5143  |
| Totals : |               |      |             | 9472.85801   | 77.62926     |         |
